# Supplementary material for: Genomic Landscape of Susceptibility to Severe COVID-19 in the Slovenian Population
Source: Preprints.org preprint supplement (doi:10.20944/preprints202406.0327.v1), 2024-06-06
Supplement: Supplementary file 1 [file supplementary]

## Sheet: ACMG classified variants
Gene	Transcript	Variant	Protein change	ACMG Classification
ADAR	NM_001365045.1	c.604C>G	p.Pro202Ala	P
AIRE	NM_000383.4	c.769C>T	p.Arg257*	P
APOE	NM_001302688.2	c.466T>C	p.Cys156Arg	R
ATM	NM_000051.3	c.6095G>A	p.Arg2032Lys	LP
BRCA2	NM_000059.3	c.7806-2A>G		P
C2	NM_001282459.2.7	c.841_868delGTGGACAGGGTCAGGAATCAGGAGTCTG	p.Val281fs	P
C6	NM_000065.4	c.2381+2T>C		P
C7	NM_000587.4	c.1561C>A	p.Arg521Ser	P
C7	NM_000587.4	c.1924_1925delAG	p.His643fs	P
C8B	NM_000066.4	c.1282C>T	p.Arg428*	P
C9	NM_001737.5	c.162C>A	p.Cys54*	P
CFD	NM_001317335.2	c.286delG	p.Glu96fs	LP
CFI	NM_001318057.2	c.111dupA	p.Tyr38fs	LP
CFTR	NM_000492.4	c.1210-11T>G		P
CFTR	NM_000492.4	c.1727G>C	p.Gly576Ala	LP
CFTR	NM_000492.4	c.2002C>T	p.Arg668Cys	LP
CFTR	NM_000492.4	c.2991G>C	p.Leu997Phe	LP
CFTR	NM_000492.4	c.3154T>G	p.Phe1052Val	P
CFTR	NM_000492.4	c.3485G>T	p.Arg1162Leu	LP
CYBA	NM_000101.4	c.222delC	p.Ala75fs	LP
FANCC	NM_000136.3	c.487_490delGAGA	p.Glu163fs	LP
HAVCR2	NM_032782.5	c.291A>G	p.Ile97Met	LP
HPS4	NM_001349900.2	c.649C>T	p.Arg217*	P
IL36RN	NM_012275.3	c.338C>T	p.Ser113Leu	P
MASP2	NM_006610.4	c.359A>G	p.Asp120Gly	LP
MBL2	NM_000242.2	c.154C>T	p.Arg52Cys	R
MBL2	NM_000242.2	c.161G>A	p.Gly54Asp	R
MEFV	NM_000243.2	c.2084A>G	p.Lys695Arg	LP
MEFV	NM_000243.2	c.2230G>T	p.Ala744Ser	LP
PGM3	NM_001199917.2	c.463delA	p.Arg155fs	LP
POLR3A	NM_007055.4	c.1771-7C>G		P
PRF1	NM_001083116.3	c.272C>T	p.Ala91Val	R
RNASEL	NM_021133.4	c.1567-11_1574delCTTTTGTGCAGGACCTTGG	p.Asp523fs	LP
RNU4ATAC	NR_023343.1	n.40C>T		P
RNU4ATAC	NR_023343.1	n.8C>T		LP
TNFRSF13B	NM_012452.3	c.310T>C	p.Cys104Arg	P
ABO	NM_020469.3	c.677C>T	p.Pro226Leu	VUS
ACE2	NM_001371415.1	c.1902A>C	p.Glu634Asp	VUS
ADAR	NM_001365045.1	c.1853T>C	p.Phe618Ser	VUS
AGT	NM_000029.4	c.1174C>A	p.Leu392Met	VUS
AGTR1	NM_004835.4	c.243C>G	p.Asn81Lys	VUS
AK2	NM_001625.4	c.715A>G	p.Ile239Val	VUS
AK5	NM_174858.3	c.481A>G	p.Ile161Val	VUS
AK5	NM_174858.3	c.796G>A	p.Asp266Asn	VUS
AP3B1	NM_003664.4	c.2188C>T	p.Arg730Trp	VUS
AP3D1	NM_001261826.3	c.2580G>T	p.Lys860Asn	VUS
AP3D1	NM_001261826.3	c.2679+1G>C		VUS
ARHGEF1	NM_199002.2	c.2774G>A	p.Gly925Asp	VUS
ATP11A	NM_032189.3	c.2887C>T	p.Arg963Cys	VUS
ATP11A	NM_032189.3	c.3461C>A	p.Ala1154Asp	VUS
ATP11A	NM_032189.3	c.569A>C	p.Lys190Thr	VUS
BLK	NM_001715.3	c.1369C>G	p.Pro457Ala	VUS
BLM	NM_000057.4	c.2474C>T	p.Pro825Leu	VUS
BLM	NM_000057.4	c.727A>G	p.Ile243Val	VUS
BLNK	NM_013314.3	c.88G>C	p.Gly30Arg	VUS
BRCA2	NM_000059.3	c.6712G>A	p.Asp2238Asn	VUS
BRIP1	NM_032043.3	c.347C>G	p.Ser116Cys	VUS
C2	NM_001178063.2.7	c.72G>T	p.Lys24Asn	VUS
C2	NM_000063.6.2	c.829G>A	p.Ala277Thr	VUS
C3	NM_000064.4	c.1433G>T	p.Arg478Leu	VUS
C3	NM_000064.4	c.4484C>T	p.Pro1495Leu	VUS
C5	NM_001317163.2	c.3889A>G	p.Ile1297Val	VUS
C5	NM_001317163.2	c.65C>T	p.Ala22Val	VUS
C6	NM_000065.4	c.230G>A	p.Arg77Lys	VUS
C7	NM_000587.4	c.175G>A	p.Gly59Arg	VUS
C8A	NM_000562.3	c.193C>A	p.Gln65Lys	VUS
C8B	NM_001278544.1	c.8C>A	p.Thr3Asn	VUS
C8G	NM_000606.3	c.80G>A	p.Arg27His	VUS
CARD11	NM_001324281.2	c.1336G>C	p.Asp446His	VUS
CARD11	NM_001324281.2	c.1619G>A	p.Gly540Glu	VUS
CARD11	NM_001324281.2	c.3284C>T	p.Thr1095Met	VUS
CARD14	NM_001366385.1	c.2192C>T	p.Ala731Val	VUS
CARD9	NM_052813.5	c.550G>A	p.Asp184Asn	VUS
CASP3	NM_001354777.1	c.117G>T	p.Met39Ile	VUS
CCHCR1	NM_001105564.1.3	c.1663T>G	p.Tyr555Asp	VUS
CCHCR1	NM_001105564.1.3	c.2108A>C	p.Glu703Ala	VUS
CCHCR1	NM_001105564.1.3	c.2350C>T	p.Arg784Cys	VUS
CCR9	NM_031200.3	c.801G>C	p.Gln267His	VUS
CD3E	NM_000733.4	c.8C>T	p.Ser3Leu	VUS
CD70	NM_001330332.2	c.69G>T	p.Leu23Phe	VUS
CD79A	NM_001783.4	c.469G>A	p.Val157Met	VUS
CEBPE	NM_001805.3	c.55G>C	p.Glu19Gln	VUS
CFB	NM_001710.6	c.1202T>C	p.Val401Ala	VUS
CFB	NM_001710.6	c.964G>A	p.Val322Ile	VUS
CFHR2	NM_005666.4	c.430A>G	p.Ile144Val	VUS
CFI	NM_001318057.2	c.670G>A	p.Asp224Asn	VUS
CFP	NM_001145252.3	c.469C>T	p.Arg157Trp	VUS
CFTR	NM_000492.4	c.3485G>A	p.Arg1162Gln	VUS
CFTR	NM_000492.4	c.4357C>T	p.Arg1453Trp	VUS
CHD7	NM_017780.4	c.2887A>G	p.Lys963Glu	VUS
CIITA	NM_001286402.1	c.1151C>A	p.Ala384Asp	VUS
CIITA	NM_001286402.1	c.1687G>A	p.Ala563Thr	VUS
CIITA	NM_001286402.1	c.2822C>T	p.Thr941Met	VUS
CIITA	NM_001286402.1	c.629C>T	p.Pro210Leu	VUS
COPA	NM_001098398.2	c.307C>T	p.His103Tyr	VUS
CSF2RB	NM_000395.3	c.1777T>G	p.Tyr593Asp	VUS
CSF3R	NM_156039.3	c.355G>A	p.Ala119Thr	VUS
CXCR4	NM_001348056.2	c.719T>C	p.Ile240Thr	VUS
CXCR4	NM_001008540.2	c.7A>G	p.Ile3Val	VUS
CYBA	NM_000101.4	c.219G>T	p.Met73Ile	VUS
DAG1	NM_001165928.3	c.1445C>T	p.Thr482Ile	VUS
DNAJC21	NM_194283.4	c.662G>A	p.Arg221Gln	VUS
DNMT3B	NM_006892.4	c.371C>T	p.Thr124Ile	VUS
DNMT3B	NM_006892.4	c.67G>A	p.Val23Ile	VUS
DNMT3B	NM_006892.4	c.73G>A	p.Gly25Arg	VUS
DOCK2	NM_004946.3	c.2060G>A	p.Arg687Gln	VUS
DOCK2	NM_004946.3	c.2545A>G	p.Lys849Glu	VUS
DOCK2	NM_004946.3	c.5165G>A	p.Arg1722Gln	VUS
DOCK8	NM_203447.3	c.1090C>T	p.Pro364Ser	VUS
DOCK8	NM_203447.3	c.3067A>G	p.Ile1023Val	VUS
DOCK8	NM_203447.3	c.5301G>C	p.Lys1767Asn	VUS
DOCK8	NM_203447.3	c.5612A>G	p.Tyr1871Cys	VUS
EFNA4	NM_182689.2	c.133G>C	p.Val45Leu	VUS
EPG5	NM_020964.3	c.5057G>A	p.Arg1686His	VUS
EPG5	NM_020964.3	c.5909A>C	p.Lys1970Thr	VUS
ERBIN	NM_001253699.2	c.3104A>G	p.Asn1035Ser	VUS
ERCC6L2	NM_020207.5	c.2420C>T	p.Ser807Leu	VUS
ERCC6L2	NM_020207.5	c.2888G>A	p.Arg963Lys	VUS
ERCC6L2	NM_020207.5	c.452A>G	p.His151Arg	VUS
F12	NM_000505.3	c.1631C>T	p.Pro544Leu	VUS
FANCA	NM_000135.4	c.3032G>A	p.Arg1011His	VUS
FANCA	NM_000135.4	c.890G>T	p.Cys297Phe	VUS
FANCC	NM_000136.3	c.1282T>G	p.Phe428Val	VUS
FANCC	NM_000136.3	c.1283T>C	p.Phe428Ser	VUS
FANCC	NM_000136.3	c.536G>A	p.Arg179Gln	VUS
FANCC	NM_000136.3	c.554G>A	p.Arg185Gln	VUS
FANCD2	NM_033084.6	c.28T>C	p.Ser10Pro	VUS
FANCE	NM_021922.3	c.806A>G	p.Asp269Gly	VUS
FANCI	NM_001113378.1	c.2684C>T	p.Ser895Leu	VUS
FANCI	NM_001113378.1	c.2869T>C	p.Phe957Leu	VUS
FANCI	NM_001113378.1	c.824T>C	p.Ile275Thr	VUS
FANCL	NM_001114636.1	c.1111_1114dupATTA	p.Thr372fs	VUS
FANCM	NM_020937.4	c.2715A>T	p.Glu905Asp	VUS
FAT4	NM_001291303.1	c.3722A>G	p.Asn1241Ser	VUS
FAT4	NM_001291303.1	c.6674A>C	p.Tyr2225Ser	VUS
FAT4	NM_001291303.1	c.7103C>A	p.Ala2368Glu	VUS
FBRSL1	NM_001142641.2	c.427G>A	p.Gly143Arg	VUS
FCGR2A	NM_001136219.2	c.821T>C	p.Leu274Pro	VUS
FCN3	NM_003665.3	c.883C>T	p.Arg295Trp	VUS
FDX2	NM_001031734.4	c.119T>G	p.Val40Gly	VUS
FERMT3	NM_178443.2	c.557C>T	p.Ser186Leu	VUS
FPR1	NM_001193306.2	c.559C>T	p.Pro187Ser	VUS
FPR2	NM_001005738.2	c.748T>C	p.Phe250Leu	VUS
FPR2	NM_001005738.2	c.888C>G	p.Cys296Trp	VUS
FUT2	NM_000511.6	c.724A>G	p.Thr242Ala	VUS
G6PD	NM_000402.4	c.82+7G>C		VUS
HAVCR1	NM_001308156.2	c.59G>T	p.Gly20Val	VUS
HCN3	NM_020897.3	c.1258C>T	p.Arg420Trp	VUS
HCN3	NM_020897.3	c.2312C>T	p.Ser771Phe	VUS
HDAC6	NM_001321225.2	c.775C>T	p.Arg259Trp	VUS
HELLS	NM_001289067.1	c.2630A>T	p.Asp877Val	VUS
HLA-B	NM_005514.8	c.621C>A	p.Asp207Glu	VUS
HLA-DRB1	NM_002124.3	c.4G>C	p.Val2Leu	VUS
HMOX1	NM_002133.3	c.167A>T	p.His56Leu	VUS
HPS1	NM_001322480.1	c.379C>T	p.Arg127Trp	VUS
HPS4	NM_001349903.2	c.1717T>C	p.Cys573Arg	VUS
HPS6	NM_024747.6	c.254C>T	p.Pro85Leu	VUS
HTRA2	NM_013247.4	c.316T>G	p.Trp106Gly	VUS
IFNGR1	NM_000416.2	c.110T>C	p.Ile37Thr	VUS
IGLL1	NM_001369906.1	c.524C>T	p.Ala175Val	VUS
IKBKG	NM_001099856.5	c.53C>T	p.Pro18Leu	VUS
IL12RB2	NM_001374259.1	c.1493G>A	p.Arg498His	VUS
IL17RA	NM_014339.7	c.812G>A	p.Arg271His	VUS
IL17RC	NM_153461.4	c.313A>C	p.Lys105Gln	VUS
IL18BP	NM_005699.3	c.269G>C	p.Ser90Thr	VUS
IL21R	NM_181079.5	c.11G>A	p.Arg4His	VUS
IL23R	NM_144701.3	c.460A>G	p.Ile154Val	VUS
IL2RA	NM_000417.3	c.188T>C	p.Leu63Pro	VUS
IL2RA	NM_000417.3	c.76G>C	p.Asp26His	VUS
IL2RB	NM_000878.5	c.1130C>G	p.Ala377Gly	VUS
IL2RG	NM_000206.2	c.1042G>A	p.Ala348Thr	VUS
IL6ST	NM_002184.4	c.2403T>G	p.His801Gln	VUS
INO80	NM_017553.3	c.2015A>G	p.Gln672Arg	VUS
INO80	NM_017553.3	c.4590C>A	p.Asn1530Lys	VUS
IRF3	NM_001197122.2	c.910G>A	p.Gly304Arg	VUS
IRF7	NM_004031.4	c.680G>A	p.Gly227Glu	VUS
IRF7	NM_004031.4	c.893G>C	p.Ser298Thr	VUS
IRF8	NM_001363907.1	c.1134G>A	p.Gln378Gln	VUS
ITCH	NM_001257137.3	c.1726C>T	p.Arg576Cys	VUS
ITCH	NM_001257137.3	c.514A>G	p.Ser172Gly	VUS
ITCH	NM_001257137.3	c.517G>A	p.Ala173Thr	VUS
ITGAV	NM_002210.5	c.2654A>G	p.His885Arg	VUS
ITGB2	NM_000211.5	c.327A>G	p.Pro109Pro	VUS
ITPKC	NM_025194.3	c.1137_1142dupTCCCGA	p.Asp379_Pro380dup	VUS
JAK1	NM_001320923.1	c.2498A>T	p.Asn833Ile	VUS
JAK1	NM_001320923.1	c.280A>T	p.Thr94Ser	VUS
KANSL1	NM_001193466.2	c.3020G>A	p.Arg1007Gln	VUS
KDM6A	NM_001291415.1	c.108G>T	p.Glu36Asp	VUS
KMT2A	NM_001197104.2	c.1486A>T	p.Ile496Phe	VUS
KMT2A	NM_001197104.2	c.4357G>A	p.Glu1453Lys	VUS
KMT2A	NM_001197104.2	c.9172G>A	p.Gly3058Ser	VUS
KMT2D	NM_003482.3	c.5356C>T	p.Arg1786Cys	VUS
KMT2D	NM_003482.3	c.7558C>T	p.Arg2520Trp	VUS
LAT	NM_001014989.2	c.536C>T	p.Thr179Ile	VUS
LAT	NM_001014989.2	c.68G>T	p.Gly23Val	VUS
LIG1	NM_000234.3	c.1379T>G	p.Leu460Arg	VUS
LIG4	NM_001352604.1	c.596T>C	p.Ile199Thr	VUS
LPIN2	NM_014646.2	c.110A>G	p.Gln37Arg	VUS
LRBA	NM_006726.4	c.4124T>G	p.Ile1375Arg	VUS
LYST	NM_000081.4	c.28C>T	p.Arg10Cys	VUS
LYST	NM_000081.4	c.3111T>A	p.Asp1037Glu	VUS
LYST	NM_000081.4	c.9617A>G	p.Asp3206Gly	VUS
MCM4	NM_005914.4	c.2384G>A	p.Arg795His	VUS
MEFV	NM_000243.2	c.1105C>T	p.Pro369Ser	VUS
MEFV	NM_000243.2	c.1223G>A	p.Arg408Gln	VUS
MEFV	NM_000243.2	c.1664A>G	p.Gln555Arg	VUS
MPO	NM_000250.2	c.1939G>A	p.Val647Met	VUS
MTHFD1	NM_001364837.1	c.2794A>G	p.Ile932Val	VUS
MUC5B	NM_002458.3	c.11558C>A	p.Pro3853His	VUS
MUC5B	NM_002458.3	c.12104C>T	p.Thr4035Ile	VUS
MUC5B	NM_002458.3	c.12718C>T	p.Pro4240Ser	VUS
MUC5B	NM_002458.3	c.12793T>C	p.Ser4265Pro	VUS
MUC5B	NM_002458.3	c.12794C>G	p.Ser4265Cys	VUS
MUC5B	NM_002458.3	c.3352T>G	p.Ser1118Ala	VUS
MUC5B	NM_002458.3	c.7897T>C	p.Trp2633Arg	VUS
MUC5B	NM_002458.3	c.9005C>A	p.Thr3002Lys	VUS
MVK	NM_000431.4	c.-15G>A		VUS
MYO5B	NM_001080467.3	c.2449G>C	p.Val817Leu	VUS
MYO5B	NM_001080467.3	c.3638A>T	p.Lys1213Met	VUS
MYO5B	NM_001080467.3	c.4240G>A	p.Glu1414Lys	VUS
MYO5B	NM_001080467.3	c.4954T>A	p.Tyr1652Asn	VUS
MYO5B	NM_001080467.3	c.5269G>A	p.Ala1757Thr	VUS
NBAS	NM_015909.4	c.4351C>G	p.Gln1451Glu	VUS
NBAS	NM_015909.4	c.4357T>G	p.Cys1453Gly	VUS
NBAS	NM_015909.4	c.4724C>T	p.Ala1575Val	VUS
NCF1	NM_000265.6	c.292T>G	p.Cys98Gly	VUS
NCSTN	NM_015331.3	c.1166C>G	p.Ser389Cys	VUS
NFE2L2	NM_006164.5	c.750T>A	p.Phe250Leu	VUS
NHP2	NM_017838.3	c.328T>A	p.Ser110Thr	VUS
NLRC4	NM_001199138.2	c.2038C>G	p.Leu680Val	VUS
NLRC4	NM_001199138.2	c.772T>C	p.Cys258Arg	VUS
NLRP3	NM_001079821.2	c.1651T>G	p.Leu551Val	VUS
PALB2	NM_024675.4	c.2869A>C	p.Lys957Gln	VUS
PARN	NM_002582.4	c.1297C>G	p.Leu433Val	VUS
PARN	NM_002582.4	c.466G>T	p.Ala156Ser	VUS
PEPD	NM_000285.4	c.1094C>T	p.Pro365Leu	VUS
PGM3	NM_001199917.2	c.1411C>G	p.Leu471Val	VUS
PIK3CD	NM_005026.5	c.2722T>G	p.Phe908Val	VUS
PIK3CG	NM_001282426.2	c.1430G>A	p.Arg477His	VUS
PIK3CG	NM_001282426.2	c.976G>A	p.Val326Met	VUS
PLCG2	NM_002661.5	c.2224C>T	p.Arg742Cys	VUS
PLEKHA4	NM_020904.3	c.1340T>C	p.Val447Ala	VUS
PLEKHA4	NM_020904.3	c.503C>T	p.Pro168Leu	VUS
PNP	NM_000270.3	c.815A>G	p.Glu272Gly	VUS
PNPLA3	NM_025225.3	c.484G>A	p.Val162Met	VUS
POLA1	NM_001330360.2	c.2560A>G	p.Lys854Glu	VUS
POLD2	NM_006230.3	c.1405A>G	p.Thr469Ala	VUS
POLE	NM_006231.4	c.16G>A	p.Gly6Ser	VUS
POLE	NM_006231.4	c.5131C>A	p.Gln1711Lys	VUS
POLE	NM_006231.4	c.5467C>T	p.Arg1823Cys	VUS
POLR3A	NM_007055.4	c.2993G>A	p.Arg998His	VUS
PRKDC	NM_006904.7	c.6211C>T	p.Arg2071Trp	VUS
PSMB8	NM_148919.4	c.458A>G	p.Lys153Arg	VUS
PSMG2	NM_020232.5	c.34C>T	p.Leu12Phe	VUS
PSTPIP1	NM_001321137.1	c.712_713delAG	p.Gln239fs	VUS
PTEN	NM_001304717.5	c.271T>A	p.Ser91Thr	VUS
PTPRC	NM_002838.5	c.1458C>G	p.Ser486Arg	VUS
PTPRC	NM_002838.5	c.1855G>A	p.Val619Ile	VUS
RAC2	NM_002872.5	c.502G>A	p.Val168Met	VUS
RAG1	NM_000448.2	c.1A>G	p.Met1?	VUS
RAG1	NM_000448.2	c.388C>T	p.His130Tyr	VUS
RAG2	NM_000536.4	c.1479A>T	p.Arg493Ser	VUS
RAVER1	NM_133452.3	c.1856C>T	p.Pro619Leu	VUS
RBCK1	NM_031229.4	c.482C>T	p.Thr161Met	VUS
RBCK1	NM_031229.4	c.998C>T	p.Ser333Leu	VUS
RECQL4	NM_004260.3	c.1649C>T	p.Ala550Val	VUS
RECQL4	NM_004260.3	c.2261G>A	p.Arg754Gln	VUS
RECQL4	NM_004260.3	c.3552G>A	p.Trp1184*	VUS
RFWD3	NM_001370534.1	c.142G>C	p.Gly48Arg	VUS
RFWD3	NM_001370534.1	c.314G>T	p.Gly105Val	VUS
RFWD3	NM_001370534.1	c.584C>T	p.Thr195Ile	VUS
RFX5	NM_000449.3	c.106G>T	p.Gly36Cys	VUS
RFX5	NM_000449.3	c.920_922delAGA	p.Lys307del	VUS
RFXANK	NM_001370238.1	c.215C>T	p.Thr72Ile	VUS
RGMA	NM_001166283.1	c.191A>G	p.Glu64Gly	VUS
RGMA	NM_001166283.1	c.643G>A	p.Gly215Ser	VUS
RIPK1	NM_001354930.2	c.521A>C	p.Asn174Thr	VUS
RNASEL	NM_021133.4	c.1857A>T	p.Gln619His	VUS
RNF31	NM_017999.5	c.1936C>T	p.Arg646Trp	VUS
RORC	NM_005060.4	c.1477G>A	p.Val493Met	VUS
RTEL1	NM_001283009.2	c.3725G>A	p.Cys1242Tyr	VUS
SAMD9L	NM_001303496.3	c.715T>G	p.Phe239Val	VUS
SAMHD1	NM_015474.3	c.695C>T	p.Thr232Met	VUS
SEMA3E	NM_012431.3	c.1996C>G	p.Arg666Gly	VUS
SFTPD	NM_003019.5	c.400A>G	p.Lys134Glu	VUS
SH3KBP1	NM_001353891.2	c.311A>T	p.Gln104Leu	VUS
SH3KBP1	NM_001353895.1	c.397A>G	p.Lys133Glu	VUS
SKIV2L	NM_006929.5.4	c.1111C>T	p.Arg371Trp	VUS
SKIV2L	NM_006929.5.4	c.2442G>C	p.Trp814Cys	VUS
SLC22A31	NM_001366322.1	c.386T>C	p.Leu129Pro	VUS
SLC22A31	NM_001366322.1	c.580C>T	p.Arg194Trp	VUS
SLC35C1	NM_018389.5	c.217C>T	p.Pro73Ser	VUS
SLC37A4	NM_001164278.2	c.923T>C	p.Met308Thr	VUS
SLC39A7	NM_001077516.2.2	c.764G>A	p.Ser255Asn	VUS
SLC6A20	NM_020208.4	c.614G>C	p.Cys205Ser	VUS
SLX4	NM_032444.4	c.4333C>T	p.Arg1445Trp	VUS
SP110	NM_080424.2	c.305G>A	p.Ser102Asn	VUS
SRP54	NM_003136.4	c.938A>G	p.Asp313Gly	VUS
SRRM1	NM_001366595.1	c.1751G>A	p.Arg584His	VUS
SRRM1	NM_001366595.1	c.47G>A	p.Arg16Gln	VUS
STAT1	NM_007315.3	c.670A>T	p.Thr224Ser	VUS
STIM1	NM_001277961.1	c.2278G>A	p.Ala760Thr	VUS
STN1	NM_024928.5	c.932A>G	p.Asp311Gly	VUS
STXBP2	NM_001272034.2	c.1477G>A	p.Val493Ile	VUS
TAP1	NM_000593.5.6	c.1951T>G	p.Phe651Val	VUS
TAP1	NM_000593.5.6	c.1952T>G	p.Phe651Cys	VUS
TAP1	NM_000593.5.6	c.1953T>G	p.Phe651Leu	VUS
TAP2	NM_000544.3.6	c.1742A>G	p.Gln581Arg	VUS
TBK1	NM_013254.4	c.868G>C	p.Glu290Gln	VUS
TCF3	NM_003200.5	c.920A>G	p.His307Arg	VUS
TCF3	NM_003200.5	c.931G>C	p.Val311Leu	VUS
TERT	NM_198253.3	c.2776G>A	p.Gly926Ser	VUS
TGFBR1	NM_001306210.2	c.1445A>G	p.Asn482Ser	VUS
TGFBR1	NM_001306210.2	c.71C>T	p.Ala24Val	VUS
TGFBR2	NM_001024847.2	c.449A>G	p.Glu150Gly	VUS
THBS3	NM_007112.5	c.2062_2064delAAG	p.Lys688del	VUS
TLR3	NM_003265.2	c.1715A>G	p.Asn572Ser	VUS
TLR4	NM_138554.5	c.2299A>G	p.Ile767Val	VUS
TLR7	NM_016562.4	c.893A>G	p.His298Arg	VUS
TMC6	NM_001127198.2	c.1502C>T	p.Ser501Phe	VUS
TNF	NM_000594.4	c.146G>T	p.Cys49Phe	VUS
TNFRSF11A	NM_003839.4	c.1544C>A	p.Pro515His	VUS
TNFRSF11A	NM_003839.4	c.1618A>G	p.Met540Val	VUS
TNFRSF1A	NM_001065.4	c.362G>A	p.Arg121Gln	VUS
TNFRSF4	NM_003327.4	c.665_670dupGCCTGG	p.Gly222_Leu223dup	VUS
TPP2	NM_001367947.1	c.2813A>G	p.Asn938Ser	VUS
TTC37	NM_014639.3	c.166C>T	p.Pro56Ser	VUS
TTC37	NM_014639.3	c.748T>G	p.Ser250Ala	VUS
TYK2	NM_003331.5	c.1543G>A	p.Val515Met	VUS
TYK2	NM_003331.5	c.1621G>A	p.Gly541Arg	VUS
USB1	NM_024598.4	c.784A>G	p.Met262Val	VUS
USP18	NM_017414.4	c.239C>T	p.Thr80Ile	VUS
VDR	NM_001364085.1	c.910G>A	p.Gly304Arg	VUS
VPS13B	NM_017890.4	c.11609T>C	p.Met3870Thr	VUS
VPS13B	NM_017890.4	c.2356A>G	p.Ile786Val	VUS
VPS13B	NM_017890.4	c.2471C>T	p.Ser824Phe	VUS
VPS13B	NM_017890.4	c.337G>T	p.Ala113Ser	VUS
VPS13B	NM_017890.4	c.3962G>A	p.Arg1321His	VUS
VPS13B	NM_017890.4	c.451G>T	p.Val151Leu	VUS
VPS13B	NM_017890.4	c.8465A>G	p.Tyr2822Cys	VUS
VPS13B	NM_017890.4	c.8767G>A	p.Val2923Ile	VUS
VPS13B	NM_017890.4	c.9800T>A	p.Ile3267Lys	VUS
WDR1	NM_017491.5	c.217A>T	p.Ile73Phe	VUS
WRAP53	NM_001143990.1	c.761T>C	p.Ile254Thr	VUS
WRAP53	NM_001143990.1	c.976G>A	p.Gly326Ser	VUS

## Sheet: Allelic frequencies
CHROM_hg19	GENPOS_hg19	[GRCh38]X.CHROM	[GRCh38]X.POS	X.ID	variant	comment	X.REF	X.ALT	p_value_unadj	p_value_adj	X.QUAL	X.INFO.AF_COVID	X.INFO.AF_Control	X.INFO.AN_COVID	X.INFO.AN_Control	X.INFO.AC_COVID	X.INFO.AC_Control	X.INFO.AC_Hemi_COVID	X.INFO.AC_Hemi_Control	X.INFO.AC_Hom_COVID	X.INFO.AC_Hom_Control	X.INFO.AC_Het_COVID	X.INFO.AC_Het_Control	X.INFO.AN	X.INFO.AC_Het	X.INFO.AC_Het.1	X.INFO.AC_Hom	X.INFO.AF	X.INFO.AN.1	X.INFO.AN.2	X.INFO.AC_Het.2	X.INFO.AC_Het.3	X.INFO.AC_Hom.1	X.INFO.AF.1	X.INFO.AN.3
chr1	154574541	chr1	154602065	rs145588689	ADAR NM_001365045.1 c.604C>G p.Pro202Ala	P	G	C	0.211483	0.328921	95351.6	0.00833333	0.00191977	120	15106	1	29	0	0	0	0	1	29	15226	30	30	0	0.00197031	15226	15226	30	30	0	0.00197031	15226
chr21	45709656	chr21	44289773	rs121434254	AIRE NM_000383.4 c.769C>T p.Arg257*	P	C	T	0.0616478	0.152249	144696	0.0169492	0.00331565	118	15080	2	50	0	0	0	2	2	48	15198	50	50	2	0.0034215	15198	15198	50	50	2	0.0034215	15198
chr19	45411941	chr19	44908684	rs429358	APOE NM_001302688.2 c.466T>C p.Cys156Arg	R	T	C	0.163644	0.279511	5420000	0.0666667	0.105898	120	15090	8	1598	0	0	2	172	6	1426	15210	1432	1432	174	0.105588	15210	15210	1432	1432	174	0.105588	15210
chr11	108186638	chr11	108315911	rs139770721	ATM NM_000051.3 c.6095G>A p.Arg2032Lys	LP	G	A	0.0388201	0.120472	3723.05	0.00833333	0.000264971	120	15096	1	4	0	0	0	0	1	4	15216	5	5	0	0.000328601	15216	15216	5	5	0	0.000328601	15216
chr13	32936658	chr13	32362521	rs81002836	BRCA2 NM_000059.3 c.7806-2A>G	P	A	G	0.0914987	0.196394	9539.61	0.00833333	0.000735688	120	14952	1	11	0	0	0	0	1	11	15072	12	12	0	0.000796178	15072	15072	12	12	0	0.000796178	15072
chr6	31902065	chr6	31934288	rs9332736	C2 NM_001282459.2.7 c.841_868delGTGGACAGGGTCAGGAATCAGGAGTCTG p.Val281fs	P	ATGGTGGACAGGGTCAGGAATCAGGAGTC	A	1	1	930069	0.00847458	0.0113953	118	15094	1	172	0	0	0	4	1	168	15212	169	169	4	0.0113726	15212	15212	169	169	4	0.0113726	15212
chr5	41150035	chr5	41149933	rs76202909	C6 NM_000065.4 c.2381+2T>C	P	A	G	0.479598	0.590076	86295.1	0.00833333	0.00538349	120	15046	1	81	0	0	0	0	1	81	15166	82	82	0	0.00540683	15166	15166	82	82	0	0.00540683	15166
chr5	40959622	chr5	40959520	rs121964920	C7 NM_000587.4 c.1561C>A p.Arg521Ser	P	C	A	0.627689	0.730537	272481	0.00833333	0.00816625	120	15062	1	123	0	0	0	2	1	121	15182	122	122	2	0.00816757	15182	15182	122	122	2	0.00816757	15182
chr5	40972543	chr5	40972441		C7 NM_000587.4 c.1924_1925delAG p.His643fs	P	CAG	C	0.0464208	0.133784	10602.6	0.00833333	0.000331345	120	15090	1	5	0	0	0	0	1	5	15210	6	6	0	0.000394477	15210	15210	6	6	0	0.000394477	15210
chr1	57406638	chr1	56940965	rs41286844	C8B NM_000066.4 c.1282C>T p.Arg428*	P	G	A	0.579275	0.678776	306091	0.00833333	0.00715137	120	15102	1	108	0	0	0	4	1	104	15222	105	105	4	0.00716069	15222	15222	105	105	4	0.00716069	15222
chr5	39342214	chr5	39342112	rs34000044	C9 NM_001737.5 c.162C>A p.Cys54*	P	G	T	0.522026	0.630356	158692	0.00833333	0.0060911	120	15104	1	92	0	0	0	0	1	92	15224	93	93	0	0.00610878	15224	15224	93	93	0	0.00610878	15224
chr19	860911	chr19	860911		CFD NM_001317335.2 c.286delG p.Glu96fs	LP	CG	C	0.0761453	0.177231	35592.7	0.00833333	0.000596184	120	15096	1	9	0	0	0	0	1	9	15216	10	10	0	0.000657203	15216	15216	10	10	0	0.000657203	15216
chr4	110687926	chr4	109766770		CFI NM_001318057.2 c.111dupA p.Tyr38fs	LP	A	AT	0.133373	0.24623	20625.7	0.00833333	0.00113047	120	15038	1	17	0	0	0	0	1	17	15158	18	18	0	0.00118749	15158	15158	18	18	0	0.00118749	15158
chr7	117188684	chr7	117548630	rs73715573	CFTR NM_000492.4 c.1210-11T>G	P	T	G	1	1	70758.2	0.00892857	0.0107108	112	14378	1	154	0	0	0	0	1	154	14490	155	155	0	0.010697	14490	14490	155	155	0	0.010697	14490
chr7	117230454	chr7	117590400	rs1800098	CFTR NM_000492.4 c.1727G>C p.Gly576Ala	LP	G	C	0.369621	0.482262	52132.3	0.00833333	0.00378687	120	15052	1	57	0	0	0	0	1	57	15172	58	58	0	0.00382283	15172	15172	58	58	0	0.00382283	15172
chr7	117232223	chr7	117592169	rs1800100	CFTR NM_000492.4 c.2002C>T p.Arg668Cys	LP	C	T	0.502663	0.612982	150677	0.00833333	0.00576083	120	15102	1	87	0	0	0	0	1	87	15222	88	88	0	0.00578111	15222	15222	88	88	0	0.00578111	15222
chr7	117250575	chr7	117610521	rs1800111	CFTR NM_000492.4 c.2991G>C p.Leu997Phe	LP	G	C	0.261611	0.380274	54520.6	0.00877193	0.00260035	114	14998	1	39	0	0	0	0	1	39	15112	40	40	0	0.0026469	15112	15112	40	40	0	0.0026469	15112
chr7	117251649	chr7	117611595	rs150212784	CFTR NM_000492.4 c.3154T>G p.Phe1052Val	P	T	G	0.0980926	0.205477	46104.5	0.00833333	0.000797024	120	15056	1	12	0	0	0	0	1	12	15176	13	13	0	0.000856616	15176	15176	13	13	0	0.000856616	15176
chr7	117267592	chr7	117627538	rs1800120	CFTR NM_000492.4 c.3485G>T p.Arg1162Leu	LP	G	T	0.210758	0.328534	117334	0.0166667	0.00704982	120	14894	2	105	0	0	0	0	2	105	15014	107	107	0	0.00712668	15014	15014	107	107	0	0.00712668	15014
chr16	88713227	chr16	88646819		CYBA NM_000101.4 c.222delC p.Ala75fs	LP	CG	C	0.14218	0.25511	844.55	0.00833333	0	120	724	1	0	0	0	0	0	1	0	844	1	1	0	0.00118483	844	844	1	1	0	0.00118483	844
chr9	97933391	chr9	95171109		FANCC NM_000136.3 c.487_490delGAGA p.Glu163fs	LP	TTCTC	T	0.14218	0.25511	357.57	0.00833333	0	120	724	1	0	0	0	0	0	1	0	844	1	1	0	0.00118483	844	844	1	1	0	0.00118483	844
chr5	156533741	chr5	157106730	rs35960726	HAVCR2 NM_032782.5 c.291A>G p.Ile97Met	LP	T	C	0.171424	0.286678	617753	0.0333333	0.0178792	120	11354	4	203	0	0	0	2	4	201	11474	205	205	2	0.0180408	11474	11474	205	205	2	0.0180408	11474
chr22	26864537	chr22	26468571	rs119471023	HPS4 NM_001349900.2 c.649C>T p.Arg217*	P	G	A	0.1328	0.24623	39276.8	0.00833333	0.00112523	120	15108	1	17	0	0	0	0	1	17	15228	18	18	0	0.00118203	15228	15228	18	18	0	0.00118203	15228
chr2	113820124	chr2	113062547	rs144478519	IL36RN NM_012275.3 c.338C>T p.Ser113Leu	P	C	T	0.378573	0.487546	154432	0.00833333	0.00390625	120	15104	1	59	0	0	0	0	1	59	15224	60	60	0	0.00394115	15224	15224	60	60	0	0.00394115	15224
chr1	11106666	chr1	11046609	rs72550870	MASP2 NM_006610.4 c.359A>G p.Asp120Gly	LP	T	C	0.18867	0.308042	2.00E+06	0.075	0.0489534	120	15096	9	739	0	0	2	38	7	701	15216	708	708	40	0.0491588	15216	15216	708	708	40	0.0491588	15216
chr10	54531242	chr10	52771482	rs5030737	MBL2 NM_000242.2 c.154C>T p.Arg52Cys	R	G	A	0.131315	0.245858	2610000	0.108333	0.0724243	120	15064	13	1091	0	0	0	70	13	1021	15184	1034	1034	70	0.0727081	15184	15184	1034	1034	70	0.0727081	15184
chr10	54531235	chr10	52771475	rs1800450	MBL2 NM_000242.2 c.161G>A p.Gly54Asp	R	C	T	0.122619	0.23274	5060000	0.191667	0.142193	120	15050	23	2140	0	0	4	296	19	1844	15170	1863	1863	300	0.142584	15170	15170	1863	1863	300	0.142584	15170
chr16	3293403	chr16	3243403	rs104895094	MEFV NM_000243.2 c.2084A>G p.Lys695Arg	LP	T	C	0.256396	0.376666	1240000	0.0416667	0.0266084	120	15108	5	402	0	0	0	8	5	394	15228	399	399	8	0.0267271	15228	15228	399	399	8	0.0267271	15228
chr16	3293257	chr16	3243257	rs61732874	MEFV NM_000243.2 c.2230G>T p.Ala744Ser	LP	C	A	0.353396	0.467695	123479	0.00833333	0.00357521	120	15104	1	54	0	0	0	0	1	54	15224	55	55	0	0.00361272	15224	15224	55	55	0	0.00361272	15224
chr6	83898342	chr6	83188623		PGM3 NM_001199917.2 c.463delA p.Arg155fs	LP	CT	C	0.0413861	0.123978	9773.34	0.00833333	0.000265534	120	11298	1	3	0	0	0	0	1	3	11418	4	4	0	0.000350324	11418	11418	4	4	0	0.000350324	11418
chr10	79769440	chr10	78009682	rs201314157	POLR3A NM_007055.4 c.1771-7C>G	P	G	C	0.0234747	0.0899107	13908.6	0.00833333	0.000132485	120	15096	1	2	0	0	0	0	1	2	15216	3	3	0	0.000197161	15216	15216	3	3	0	0.000197161	15216
chr10	72360387	chr10	70600631	rs35947132	PRF1 NM_001083116.3 c.272C>T p.Ala91Val	R	G	A	0.928061	1	2760000	0.0583333	0.0564238	120	15100	7	852	0	0	0	36	7	816	15220	823	823	36	0.0564389	15220	15220	823	823	36	0.0564389	15220
chr1	182551385	chr1	182582250		RNASEL NM_021133.4 c.1567-11_1574delCTTTTGTGCAGGACCTTGG p.Asp523fs	LP	TCCAAGGTCCTGCACAAAAG	T	0.0614066	0.152249	14052.8	0.00833333	0.000463822	120	15092	1	7	0	0	0	0	1	7	15212	8	8	0	0.000525901	15212	15212	8	8	0	0.000525901	15212
chr2	122288495	chr2	121530919	rs139495292	RNU4ATAC NR_023343.1 n.40C>T	P	C	T	0.0819713	0.186782	2022.87	0.00833333	0.000540151	120	5554	1	3	0	0	0	0	1	3	5674	4	4	0	0.00070497	5674	5674	4	4	0	0.00070497	5674
chr2	122288463	chr2	121530887	rs370715569	RNU4ATAC NR_023343.1 n.8C>T	LP	C	T	0.180251	0.29926	3404.42	0.00833333	0.00148754	120	5378	1	8	0	0	0	0	1	8	5498	9	9	0	0.00163696	5498	5498	9	9	0	0.00163696	5498
chr17	16852187	chr17	16948873	rs34557412	TNFRSF13B NM_012452.3 c.310T>C p.Cys104Arg	P	A	G	0.299933	0.412182	98476.6	0.00833333	0.00291275	120	15106	1	44	0	0	0	0	1	44	15226	45	45	0	0.00295547	15226	15226	45	45	0	0.00295547	15226
chr15	89843596	chr15	89300365		FANCI NM_001113378.1 c.2869T>C p.Phe957Leu	2 HET VUS	T	C	0.000905075	0.047969	4806.58	0.0166667	0.000264795	120	15106	2	4	0	0	0	0	2	4	15226	6	6	0	0.000394063	15226	15226	6	6	0	0.000394063	15226
chr1	161487805	chr1	161518015		FCGR2A NM_001136219.2 c.821T>C p.Leu274Pro	3 HET (+ 10 HET bad quality) VUS	T	C	1.05264e-18	7.25269e-16	16681.3	0.204545	0.00929216	88	14636	18	136	0	0	0	0	18	136	14724	154	154	0	0.0104591	14724	14724	154	154	0	0.0104591	14724
chr1	161518286	chr1	161548496	rs200727785	FCGR3A NM_000569.7 c.559G>A p.Asp187Asn	(6 HET bad quality) Benign	C	T	4.69698e-06	0.00107874	27225.5	0.0888889	0.0100426	90	14538	8	146	0	0	0	0	8	146	14628	154	154	0	0.0105278	14628	14628	154	154	0	0.0105278	14628
chr6	31324184	chr6	31356407	rs1131112	HLA-B NM_005514.8 c.379G>A p.Val127Met	1 HET Benign	C	G	0.000463071	0.0319056	4820000	0.136364	0.394792	44	10408	6	4109	0	0	2	1466	4	2643	10452	2647	2647	1468	0.393705	10452	10452	2647	2647	1468	0.393705	10452
chrX	153277383	chrX	154011932		IRAK1 NM_001569.4 c.2081-15C>T	(1 HEMI) low impact	G	A	6.20399e-05	0.00712425	825.18	0.0166667	0	120	15052	2	0	0	0	2	0	0	0	15172	0	0	2	0.000131822	15172	15172	0	0	2	0.000131822	15172
chr11	118359353	chr11	118488638		KMT2A NM_001197104.2 c.4357G>A p.Glu1453Lys	(1 HET bad quality) VUS	G	A	0.000108932	0.00947754	78.16	0.0166667	0	120	11330	2	0	0	0	0	0	2	0	11450	2	2	0	0.000174672	11450	11450	2	2	0	0.000174672	11450
chr16	28996698	chr16	28985377		LAT NM_001014989.2 c.68G>T p.Gly23Val	2 HET VUS	G	T	0.000110044	0.00947754	1118.2	0.0166667	0	120	11272	2	0	0	0	0	0	2	0	11392	2	2	0	0.000175562	11392	11392	2	2	0	0.000175562	11392
chr11	1270876	chr11	1249646	rs373639590	MUC5B NM_002458.3 c.12766A>G p.Thr4256Ala	(2 HET bad quality) Benign	A	G	3.92109e-07	0.000135082	310.06	0.0267857	0	112	15054	3	0	0	0	0	0	3	0	15166	3	3	0	0.000197811	15166	15166	3	3	0	0.000197811	15166
chr11	1270894	chr11	1249664		MUC5B NM_002458.3 c.12784T>G p.Ser4262Ala	(2 HET bad quality) Benign	T	G	5.21734e-05	0.00712425	284.81	0.0181818	0	110	15050	2	0	0	0	0	0	2	0	15160	2	2	0	0.000131926	15160	15160	2	2	0	0.000131926	15160
chr11	1270903	chr11	1249673		MUC5B NM_002458.3 c.12793T>C p.Ser4265Pro	(2 HET bad quality) VUS	T	C	5.40825e-05	0.00712425	287.52	0.0178571	0	112	15050	2	0	0	0	0	0	2	0	15162	2	2	0	0.000131909	15162	15162	2	2	0	0.000131909	15162
chr1	9784337	chr1	9724279		PIK3CD NM_005026.5 c.2722T>G p.Phe908Val	(2 HET bad quality) VUS	T	G	0.000579022	0.0332455	270.98	0.0212766	0.000269687	94	14832	2	4	0	0	0	0	2	4	14926	6	6	0	0.000401983	14926	14926	6	6	0	0.000401983	14926
chr16	81953182	chr16	81919577	rs367677388	PLCG2 NM_002661.5 c.2148C>T p.Leu716Leu	1 HOM Benign	C	T	0.000367041	0.028099	2775.1	0.0166667	0.000132626	120	15080	2	2	0	0	2	0	0	2	15200	2	2	2	0.000263158	15200	15200	2	2	2	0.000263158	15200
chrX	12904520	chrX	12886401		TLR7 NM_016562.4 c.893A>G p.His298Arg	1 HEMI VUS	A	G	0.000514204	0.0322079	1881.12	0.0181818	0.000199309	110	15052	2	3	0	0	2	2	0	1	15162	1	1	4	0.000329772	15162	15162	1	1	4	0.000329772	15162
		chr6	32039081	rs6467			C	A	0.919387	1	2.80E+07	0.608333	0.603796	120	14856	73	8970	0	0	48	5386	25	3584	14976	3609	3609	5434	0.603833	14976	14976	3609	3609	5434	0.603833	14976
		chr3	10048054	rs62245508			A	G	0.733643	0.830017	15500000	0.45	0.465556	120	15068	54	7015	0	0	0	0	54	7015	15188	7069	7069	0	0.465433	15188	15188	7069	7069	0	0.465433	15188
chr1	1147176	chr1	1211796				A	ACCAGGC	0.00804397	0.0663129	827.55	0.00833333	0	120	14798	1	0	0	0	0	0	1	0	14918	1	1	0	6.70E-05	14918	14918	1	1	0	6.70E-05	14918
chr1	9784327	chr1	9724269				CCCTCAGCTGTTCCACATTGATTTTGGCCACTTTCTGGGGAATTTCAAGACCAAGTTTGGAATCAACCGCGAGCGTGTCCCATTCAT	C	1	1	31.55	0	0.00138122	120	724	0	1	0	0	0	0	0	1	844	1	1	0	0.00118483	844	844	1	1	0	0.00118483	844
chr1	9784337	chr1	9724279				T	*	1	1	270.98	0	6.74E-05	94	14832	0	1	0	0	0	0	0	1	14926	1	1	0	6.70E-05	14926	14926	1	1	0	6.70E-05	14926
chr1	24972500	chr1	24646009				G	A	0.0104767	0.0663129	674.61	0.00833333	0	120	11334	1	0	0	0	0	0	1	0	11454	1	1	0	8.73E-05	11454	11454	1	1	0	8.73E-05	11454
chr1	24989688	chr1	24663197	rs202171183			A	G	0.244303	0.36513	51311.1	0.00833333	0.00225098	120	10662	1	24	0	0	0	0	1	24	10782	25	25	0	0.00231868	10782	10782	25	25	0	0.00231868	10782
chr1	24993386	chr1	24666895	rs78787676			G	A	0.0613958	0.152249	16317.4	0.00833333	0.000442243	120	11306	1	5	0	0	0	0	1	5	11426	6	6	0	0.000525118	11426	11426	6	6	0	0.000525118	11426
chr1	27695744	chr1	27369253	rs202230664			G	A	0.0906697	0.196394	26782.3	0.00833333	0.00072867	120	15096	1	11	0	0	0	0	1	11	15216	12	12	0	0.000788644	15216	15216	12	12	0	0.000788644	15216
chr1	33476435	chr1	33010834				C	CTTTGGAGAAGGCTGCTAGGGTGCT	0.721458	0.821627	103448	0.0238095	0.0470999	42	4586	1	216	0	0	0	0	1	216	4628	217	217	0	0.0468885	4628	4628	217	217	0	0.0468885	4628
chr1	33476435	chr1	33010834				C	CTT	0.0955171	0.204383	103448	0.0238095	0.00218055	42	4586	1	10	0	0	0	0	1	10	4628	11	11	0	0.00237684	4628	4628	11	11	0	0.00237684	4628
chr1	33476435	chr1	33010834				C	CTTTGGAGAAGGCTGCTAGGG	0.413849	0.522238	103448	0	0.0403402	42	4586	0	185	0	0	0	0	0	185	4628	185	185	0	0.0399741	4628	4628	185	185	0	0.0399741	4628
chr1	33476435	chr1	33010834				C	A	1	1	103448	0	0.00654165	42	4586	0	30	0	0	0	0	0	30	4628	30	30	0	0.00648228	4628	4628	30	30	0	0.00648228	4628
chr1	33478787	chr1	33013186				T	C	0.0613517	0.152249	10900.7	0.00833333	0.000463392	120	15106	1	7	0	0	0	0	1	7	15226	8	8	0	0.000525417	15226	15226	8	8	0	0.000525417	15226
chr1	33487007	chr1	33021406	rs61750965			C	T	0.146438	0.260762	161047	0.0169492	0.00563362	118	15088	2	85	0	0	0	0	2	85	15206	87	87	0	0.00572143	15206	15206	87	87	0	0.00572143	15206
chr1	36940984	chr1	36475383	rs142999683			C	T	0.255132	0.37575	52056.2	0.00833333	0.00239489	120	15032	1	36	0	0	0	0	1	36	15152	37	37	0	0.00244192	15152	15152	37	37	0	0.00244192	15152
chr1	41482901	chr1	41017229	rs141445707			C	T	0.539087	0.644845	164656	0.00833333	0.00637959	120	11286	1	72	0	0	0	0	1	72	11406	73	73	0	0.00640014	11406	11406	73	73	0	0.00640014	11406
chr1	57340643	chr1	56874970	rs147022920			C	A	0.09129	0.196394	20483.8	0.00833333	0.00073392	120	14988	1	11	0	0	0	0	1	11	15108	12	12	0	0.000794281	15108	15108	12	12	0	0.000794281	15108
chr1	57406638	chr1	56940965	rs41286844			G	T	1	1	306091	0	6.62E-05	120	15102	0	1	0	0	0	0	0	1	15222	1	1	0	6.57E-05	15222	15222	1	1	0	6.57E-05	15222
chr1	57425257	chr1	56959584				G	T	0.0304831	0.10344	5022.38	0.00833333	0.000172861	120	11570	1	2	0	0	0	0	1	2	11690	3	3	0	0.00025663	11690	11690	3	3	0	0.00025663	11690
chr1	65307190	chr1	64841507	rs187043211			T	A	0.0104584	0.0663129	4510.11	0.00833333	0	120	11354	1	0	0	0	0	0	1	0	11474	1	1	0	8.72E-05	11474	11474	1	1	0	8.72E-05	11474
chr1	65307190	chr1	64841507	rs187043211			T	C	1	1	4510.11	0	8.81E-05	120	11354	0	1	0	0	0	0	0	1	11474	1	1	0	8.72E-05	11474	11474	1	1	0	8.72E-05	11474
chr1	65312368	chr1	64846685	rs149968614			C	T	0.0207724	0.0899107	4887.28	0.00833333	8.79E-05	120	11374	1	1	0	0	0	0	1	1	11494	2	2	0	0.000174004	11494	11494	2	2	0	0.000174004	11494
chr1	65321324	chr1	64855641	rs61735631			G	A	0.463829	0.575816	188985	0.00833333	0.00512006	120	11328	1	58	0	0	0	0	1	58	11448	59	59	0	0.00515374	11448	11448	59	59	0	0.00515374	11448
chr1	65344757	chr1	64879074				T	A	0.0104694	0.0663129	685.59	0.00833333	0	120	11342	1	0	0	0	0	0	1	0	11462	1	1	0	8.72E-05	11462	11462	1	1	0	8.72E-05	11462
chr1	67648611	chr1	67182928				A	G	0.0157071	0.0788654	2639.69	0.00833333	6.62E-05	120	15100	1	1	0	0	0	0	1	1	15220	2	2	0	0.000131406	15220	15220	2	2	0	0.000131406	15220
chr1	67672567	chr1	67206884	rs5774857			CT	C	1	1	25043.4	0.0408163	0.0402542	98	472	4	19	0	0	0	0	4	19	570	23	23	0	0.0403509	570	570	23	23	0	0.0403509	570
chr1	67672567	chr1	67206884	rs5774857			C	CTT	0.68442	0.787255	25043.4	0.0204082	0.0169492	98	472	2	8	0	0	0	0	2	8	570	10	10	0	0.0175439	570	570	10	10	0	0.0175439	570
chr1	67672567	chr1	67206884	rs5774857			C	CT	0.0564767	0.148911	25043.4	0.27551	0.377119	98	472	27	178	0	0	6	64	21	114	570	135	135	70	0.359649	570	570	135	135	70	0.359649	570
chr1	67838152	chr1	67372469	rs145064314			G	A	0.332598	0.44344	72846.6	0.00833333	0.00331126	120	15100	1	50	0	0	0	0	1	50	15220	51	51	0	0.00335085	15220	15220	51	51	0	0.00335085	15220
chr1	67861350	chr1	67395667	rs144657291			T	A	0.166538	0.281681	100396	0.00833333	0.00145676	120	15102	1	22	0	0	0	0	1	22	15222	23	23	0	0.00151097	15222	15222	23	23	0	0.00151097	15222
chr1	67861434	chr1	67395751				C	T	0.192552	0.312161	95641.4	0.00833333	0.00172163	120	15102	1	26	0	0	0	2	1	24	15222	25	25	2	0.00177375	15222	15222	25	25	2	0.00177375	15222
chr1	77763309	chr1	77297624	rs202109440			A	G	0.0104803	0.0663129	2382.89	0.00833333	0	120	11330	1	0	0	0	0	0	1	0	11450	1	1	0	8.73E-05	11450	11450	1	1	0	8.73E-05	11450
chr1	77806158	chr1	77340473				G	A	0.0104694	0.0663129	349.59	0.00833333	0	120	11342	1	0	0	0	0	0	1	0	11462	1	1	0	8.72E-05	11462	11462	1	1	0	8.72E-05	11462
chr1	151315590	chr1	151343114				CTCT	C	0.046385	0.133784	11697.5	0.00833333	0.000331082	120	15102	1	5	0	0	0	0	1	5	15222	6	6	0	0.000394166	15222	15222	6	6	0	0.000394166	15222
chr1	151317198	chr1	151344722				A	C	0.168025	0.282364	9281.05	0.1	0.0180723	10	5810	1	105	0	0	0	0	1	105	5820	106	106	0	0.0182131	5820	5820	106	106	0	0.0182131	5820
chr1	151317198	chr1	151344722				A	ACC	1	1	9281.05	0	0.000172117	10	5810	0	1	0	0	0	0	0	1	5820	1	1	0	0.000171821	5820	5820	1	1	0	0.000171821	5820
chr1	151317198	chr1	151344722				A	ACCCCC	1	1	9281.05	0	0.000172117	10	5810	0	1	0	0	0	0	0	1	5820	1	1	0	0.000171821	5820	5820	1	1	0	0.000171821	5820
chr1	151318691	chr1	151346215				C	A	0.00788229	0.0663129	647.59	0.00833333	0	120	15104	1	0	0	0	0	0	1	0	15224	1	1	0	6.57E-05	15224	15224	1	1	0	6.57E-05	15224
chr1	151780028	chr1	151807552	rs138308209			C	T	0.0412156	0.123978	7939.47	0.00833333	0.00026441	120	11346	1	3	0	0	0	0	1	3	11466	4	4	0	0.000348857	11466	11466	4	4	0	0.000348857	11466
chr1	154408560	chr1	154436084	rs148682883			C	T	0.25432	0.37575	85290.2	0.00833333	0.002386	120	15088	1	36	0	0	0	0	1	36	15208	37	37	0	0.00243293	15208	15208	37	37	0	0.00243293	15208
chr1	154570412	chr1	154597936				A	G	0.0234839	0.0899107	7743.8	0.00833333	0.000132538	120	15090	1	2	0	0	0	0	1	2	15210	3	3	0	0.000197239	15210	15210	3	3	0	0.000197239	15210
chr1	155039225	chr1	155066749	rs142249822			G	C	0.371158	0.482262	109743	0.00833333	0.00379055	120	11344	1	43	0	0	0	0	1	43	11464	44	44	0	0.0038381	11464	11464	44	44	0	0.0038381	11464
chr1	155039270	chr1	155066794	rs148289726			C	T	0.377506	0.487082	123365	0.00833333	0.00387529	120	11354	1	44	0	0	0	0	1	44	11474	45	45	0	0.00392191	11474	11474	45	45	0	0.00392191	11474
chr1	155168209	chr1	155198418				CCTT	C	0.0512797	0.143362	22421.1	0.00833333	0.000352734	120	11340	1	4	0	0	0	0	1	4	11460	5	5	0	0.0004363	11460	11460	5	5	0	0.0004363	11460
chr1	155255536	chr1	155285745				C	T	0.0588236	0.152249	9512.32	0.00847458	0.000430219	118	11622	1	5	0	0	0	0	1	5	11740	6	6	0	0.000511073	11740	11740	6	6	0	0.000511073	11740
chr1	155257596	chr1	155287805	rs139768739			G	A	0.0906159	0.196394	17888	0.00833333	0.000707089	120	11314	1	8	0	0	0	0	1	8	11434	9	9	0	0.000787126	11434	11434	9	9	0	0.000787126	11434
chr1	155258241	chr1	155288450				C	T	0.0104913	0.0663129	507.59	0.00833333	0	120	11318	1	0	0	0	0	0	1	0	11438	1	1	0	8.74E-05	11438	11438	1	1	0	8.74E-05	11438
chr1	160305034	chr1	160335244	rs200420166			G	A	0.0208663	0.0899107	1209.9	0.00833333	8.83E-05	120	11322	1	1	0	0	0	0	1	1	11442	2	2	0	0.000174795	11442	11442	2	2	0	0.000174795	11442
chr1	160323014	chr1	160353224	rs199830369			C	G	0.015703	0.0788654	1378.68	0.00833333	6.62E-05	120	15104	1	1	0	0	0	0	1	1	15224	2	2	0	0.000131372	15224	15224	2	2	0	0.000131372	15224
chr1	182550408	chr1	182581273				T	A	0.0464388	0.133784	7326.64	0.00833333	0.000331477	120	15084	1	5	0	0	0	0	1	5	15204	6	6	0	0.000394633	15204	15204	6	6	0	0.000394633	15204
chr1	182555149	chr1	182586014	rs74315364			C	A	0.0858112	0.191961	157006	0.0166667	0.00397088	120	15110	2	60	0	0	0	0	2	60	15230	62	62	0	0.00407091	15230	15230	62	62	0	0.00407091	15230
chr1	182555640	chr1	182586505	rs115634589			A	G	0.0026604	0.0663129	31567.8	0.0166667	0.000529661	120	15104	2	8	0	0	0	0	2	8	15224	10	10	0	0.000656858	15224	15224	10	10	0	0.000656858	15224
chr1	196920158	chr1	196951028				A	G	0.0312059	0.10344	8079.47	0.00833333	0.000198913	120	15082	1	3	0	0	0	0	1	3	15202	4	4	0	0.000263123	15202	15202	4	4	0	0.000263123	15202
chr1	196977644	chr1	197008514	rs141321678			T	G	0.170058	0.285085	19181.3	0.00833333	0.00149072	120	14758	1	22	0	0	0	0	1	22	14878	23	23	0	0.00154591	14878	14878	23	23	0	0.00154591	14878
chr1	198687230	chr1	198718101	rs200407298			C	G	0.0761357	0.177231	13206.6	0.00833333	0.000596105	120	15098	1	9	0	0	0	0	1	9	15218	10	10	0	0.000657117	15218	15218	10	10	0	0.000657117	15218
chr1	198698291	chr1	198729162				G	A	0.0233515	0.0899107	4675.16	0.00847458	0.000134012	118	14924	1	2	0	0	0	0	1	2	15042	3	3	0	0.000199442	15042	15042	3	3	0	0.000199442	15042
chr1	207641950	chr1	207468605	rs75282758			C	T	0.353656	0.467695	119334	0.00833333	0.00357853	120	15090	1	54	0	0	0	0	1	54	15210	55	55	0	0.00361604	15210	15210	55	55	0	0.00361604	15210
chr1	230840034	chr1	230704288	rs1805090			G	T	0.186059	0.304654	50825	0.00833333	0.00165475	120	15108	1	25	0	0	0	0	1	25	15228	26	26	0	0.00170738	15228	15228	26	26	0	0.00170738	15228
chr1	234744601	chr1	234608855				C	T	0.293681	0.407956	39422.1	0.00833333	0.00281818	120	11000	1	31	0	0	0	0	1	31	11120	32	32	0	0.0028777	11120	11120	32	32	0	0.0028777	11120
chr1	235880022	chr1	235716722				T	C	0.0313773	0.10344	5144.04	0.00833333	0.000200027	120	14998	1	3	0	0	0	0	1	3	15118	4	4	0	0.000264585	15118	15118	4	4	0	0.000264585	15118
chr1	235922765	chr1	235759465	rs148371004			C	T	0.283099	0.397832	92990.2	0.00833333	0.00271451	120	15104	1	41	0	0	0	2	1	39	15224	40	40	2	0.0027588	15224	15224	40	40	2	0.0027588	15224
chr1	235938329	chr1	235775029	rs115330112			A	C	0.297696	0.411048	176179	0.0166667	0.00902575	120	15068	2	136	0	0	0	4	2	132	15188	134	134	4	0.00908612	15188	15188	134	134	4	0.00908612	15188
chr1	235969325	chr1	235806025				A	T	0.00788747	0.0663129	586.59	0.00833333	0	120	15094	1	0	0	0	0	0	1	0	15214	1	1	0	6.57E-05	15214	15214	1	1	0	6.57E-05	15214
chr1	235972432	chr1	235809132	rs77091385			C	G	0.115651	0.22383	200962	0.0166667	0.00476948	120	15096	2	72	0	0	0	0	2	72	15216	74	74	0	0.0048633	15216	15216	74	74	0	0.0048633	15216
chr1	235993690	chr1	235830390				G	A	0.0252354	0.0950119	2636.72	0.00833333	0.000142592	120	14026	1	2	0	0	0	0	1	2	14146	3	3	0	0.000212074	14146	14146	3	3	0	0.000212074	14146
chr1	247588396	chr1	247425094	.			T	G			2619.66	.	0.0027633	0	12666	0	35	0	0	0	0	0	35	12666	35	35	0	0.0027633	12666	12666	35	35	0	0.0027633
chr10	6067865	chr10	6025902				A	G	0.316748	0.426249	88844.5	0.00833333	0.00311547	120	15086	1	47	0	0	0	0	1	47	15206	48	48	0	0.00315665	15206	15206	48	48	0	0.00315665	15206
chr10	6067977	chr10	6026014	rs55868253			C	G	0.0621136	0.152844	10413.3	0.00833333	0.000469358	120	14914	1	7	0	0	0	0	1	7	15034	8	8	0	0.000532127	15034	15034	8	8	0	0.000532127	15034
chr10	6067977	chr10	6026014	rs55868253			C	T	1	1	10413.3	0	6.71E-05	120	14914	0	1	0	0	0	0	0	1	15034	1	1	0	6.65E-05	15034	15034	1	1	0	6.65E-05	15034
chr10	14941269	chr10	14899270				T	C	0.119373	0.227833	20385.7	0.00833333	0.000947867	120	8440	1	8	0	0	0	0	1	8	8560	9	9	0	0.0010514	8560	8560	9	9	0	0.0010514	8560
chr10	72358722	chr10	70598966	rs28933375			T	C	0.572369	0.672973	296876	0.00833333	0.00701615	120	15108	1	106	0	0	0	0	1	106	15228	107	107	0	0.00702653	15228	15228	107	107	0	0.00702653	15228
chr10	79741937	chr10	77982179	rs143422889			C	T	0.26619	0.382439	81472.3	0.00833333	0.00251989	120	15080	1	38	0	0	0	0	1	38	15200	39	39	0	0.00256579	15200	15200	39	39	0	0.00256579	15200
chr10	79745739	chr10	77985981	rs139665002			C	T	0.230044	0.348998	60138.3	0.00833333	0.00211864	120	15104	1	32	0	0	0	0	1	32	15224	33	33	0	0.00216763	15224	15224	33	33	0	0.00216763	15224
chr10	79769440	chr10	78009682	rs201314157			G	T	1	1	13908.6	0	0.000132485	120	15096	0	2	0	0	0	0	0	2	15216	2	2	0	0.000131441	15216	15216	2	2	0	0.000131441	15216
chr10	81701739	chr10	79941983	rs80268129			C	T	0.0688234	0.16649	10200.3	0.00833333	0.000530152	120	15090	1	8	0	0	0	0	1	8	15210	9	9	0	0.000591716	15210	15210	9	9	0	0.000591716	15210
chr10	81702177	chr10	79942421				T	C	0.0311735	0.10344	4557.1	0.00833333	0.000198702	120	15098	1	3	0	0	0	0	1	3	15218	4	4	0	0.000262847	15218	15218	4	4	0	0.000262847	15218
chr10	89623978	chr10	87864221				T	A	0.025603	0.0958722	2007.57	0.00833333	0.000108767	120	9194	1	1	0	0	0	0	1	1	9314	2	2	0	0.000214731	9314	9314	2	2	0	0.000214731	9314
chr10	90771767	chr10	89012010	rs56006128			G	A	0.5224	0.630356	165240	0.00833333	0.00609756	120	15088	1	92	0	0	0	0	1	92	15208	93	93	0	0.0061152	15208	15208	93	93	0	0.0061152	15208
chr10	96361354	chr10	94601597	rs150576597			A	T	0.0311369	0.10344	1142.53	0.00833333	0.000176647	120	11322	1	2	0	0	0	0	1	2	11442	3	3	0	0.000262192	11442	11442	3	3	0	0.000262192	11442
chr10	98006765	chr10	96247009	rs143109144			C	G	0.594034	0.694888	93620.9	0.00833333	0.0074478	120	15038	1	112	0	0	0	2	1	110	15158	111	111	2	0.00745481	15158	15158	111	111	2	0.00745481	15158
chr10	100193725	chr10	98433968	rs374761960			G	A	0.00788955	0.0663129	609.59	0.00833333	0	120	15090	1	0	0	0	0	0	1	0	15210	1	1	0	6.57E-05	15210	15210	1	1	0	6.57E-05	15210
chr10	103825485	chr10	102065728				C	T	0.0984141	0.205477	69929.4	0.00833333	0.000799787	120	15004	1	12	0	0	0	0	1	12	15124	13	13	0	0.000859561	15124	15124	13	13	0	0.000859561	15124
chr10	104160186	chr10	102400429	rs200227171			G	A	0.336726	0.447884	97867.8	0.00833333	0.00334566	120	11358	1	38	0	0	0	0	1	38	11478	39	39	0	0.0033978	11478	11478	39	39	0	0.0033978	11478
chr10	105648847	chr10	103889089				T	C	0.0104603	0.0663129	328.59	0.00833333	0	120	11352	1	0	0	0	0	0	1	0	11472	1	1	0	8.72E-05	11472	11472	1	1	0	8.72E-05	11472
chr11	320723	chr11	320723	rs199582787			C	T	1	1	90404.3	0.00862069	0.0155122	116	14956	1	232	0	0	0	0	1	232	15072	233	233	0	0.0154591	15072	15072	233	233	0	0.0154591	15072
chr11	613589	chr11	613589	rs192177735			C	G	0.0745461	0.176503	39860.3	0.0121951	0.000879329	82	14784	1	13	0	0	0	0	1	13	14866	14	14	0	0.000941746	14866	14866	14	14	0	0.000941746	14866
chr11	614212	chr11	614212	rs140823442			C	T	0.0988502	0.205764	37744.3	0.00833333	0.000803536	120	14934	1	12	0	0	0	0	1	12	15054	13	13	0	0.000863558	15054	15054	13	13	0	0.000863558	15054
chr11	1252648	chr11	1231418	rs138440673			G	A	0.729033	0.826157	599629	0.00833333	0.0185234	120	15062	1	279	0	0	0	6	1	273	15182	274	274	6	0.0184429	15182	15182	274	274	6	0.0184429	15182
chr11	1253691	chr11	1232461	rs56411917			C	T	0.297007	0.41092	315663	0.0166667	0.0090102	120	15094	2	136	0	0	0	4	2	132	15214	134	134	4	0.00907059	15214	15214	134	134	4	0.00907059	15214
chr11	1258377	chr11	1237147	rs199977970			G	A	0.0267207	0.0995165	68714.2	0.0166667	0.00200776	120	14942	2	30	0	0	0	0	2	30	15062	32	32	0	0.00212455	15062	15062	32	32	0	0.00212455	15062
chr11	1264322	chr11	1243092	rs201094696			T	G	0.0291934	0.10344	4319.18	0.0169492	0.00214909	118	14890	2	32	0	0	0	0	2	32	15008	34	34	0	0.00226546	15008	15008	34	34	0	0.00226546	15008
chr11	1264327	chr11	1243097				C	A	0.0206287	0.0899107	2952.46	0.0166667	0.00173287	120	15004	2	26	0	0	0	0	2	26	15124	28	28	0	0.00185136	15124	15124	28	28	0	0.00185136	15124
chr11	1264336	chr11	1243106	rs200842561			T	C	0.699095	0.800127	83476.3	0.0178571	0.0158805	112	14924	2	237	0	0	0	4	2	233	15036	235	235	4	0.0158952	15036	15036	235	235	4	0.0158952	15036
chr11	1264368	chr11	1243138	rs200562837			A	T	0.29351	0.407956	7489.12	0.00862069	0.00293568	116	14988	1	44	0	0	0	0	1	44	15104	45	45	0	0.00297934	15104	15104	45	45	0	0.00297934	15104
chr11	1264393	chr11	1243163				A	G	0.0540829	0.144993	9195.46	0.0169492	0.00306953	118	14986	2	46	0	0	0	0	2	46	15104	48	48	0	0.00317797	15104	15104	48	48	0	0.00317797	15104
chr11	1264632	chr11	1243402				CACAGTGACTCCCTCCTCTGCCCTAGGGACCACCCACACACCCCCAGTGCCGAA	C	1	1	75911.8	0	0.00539784	116	15006	0	81	0	0	0	0	0	81	15122	81	81	0	0.00535643	15122	15122	81	81	0	0.00535643	15122
chr11	1264637	chr11	1243407				TGACTCCCTCCTCTGCCCTAGGGACCACCCACACACCCCCAGTGC	T	0.415356	0.523182	41848.8	0.00862069	0.00456744	116	14888	1	68	0	0	0	0	1	68	15004	69	69	0	0.00459877	15004	15004	69	69	0	0.00459877	15004
chr11	1264637	chr11	1243407				TGACTCCCTCCTCTGCCCTAGGGACCACCCACACACCCCCAGTGC	*	1	1	41848.8	0	0.00100752	116	14888	0	15	0	0	0	0	0	15	15004	15	15	0	0.000999733	15004	15004	15	15	0	0.000999733	15004
chr11	1264685	chr11	1243455	rs201191795			A	C	0.494588	0.605278	51261	0.00961538	0.00649351	104	14168	1	92	0	0	0	0	1	92	14272	93	93	0	0.00651626	14272	14272	93	93	0	0.00651626	14272
chr11	1264685	chr11	1243455	rs201191795			A	*	1	1	51261	0	0.000988142	104	14168	0	14	0	0	0	0	0	14	14272	14	14	0	0.000980942	14272	14272	14	14	0	0.000980942	14272
chr11	1264704	chr11	1243474	rs199522197			C	G	1	1	215096	0.00877193	0.0113968	114	14390	1	164	0	0	0	12	1	152	14504	153	153	12	0.0113762	14504	14504	153	153	12	0.0113762	14504
chr11	1264795	chr11	1243565	rs200138247			G	C	0.36063	0.475094	162129	0.00833333	0.00366862	120	14992	1	55	0	0	0	0	1	55	15112	56	56	0	0.00370566	15112	15112	56	56	0	0.00370566	15112
chr11	1264954	chr11	1243724				ACCACAG	A	0.686701	0.788431	1375.76	0.0166667	0.0140056	120	714	2	10	0	0	0	0	2	10	834	12	12	0	0.0143885	834	834	12	12	0	0.0143885	834
chr11	1264954	chr11	1243724	.			ACCACAG	A			251037	.	0.017737	0	14264	0	253	0	0	0	0	0	253	14264	253	253	0	0.017737	14264	14264	253	253	0	0.017737
chr11	1264954	chr11	1243724	.			A	G			251037	.	7.01E-05	0	14264	0	1	0	0	0	0	0	1	14264	1	1	0	7.01E-05	14264	14264	1	1	0	7.01E-05
chr11	1264985	chr11	1243755	rs201272043			G	A	1	1	687811	0.0166667	0.0212681	120	14952	2	318	0	0	0	0	2	318	15072	320	320	0	0.0212314	15072	15072	320	320	0	0.0212314	15072
chr11	1265026	chr11	1243796	rs200568241			A	G	0.29589	0.410198	168661	0.00833333	0.00286438	120	15012	1	43	0	0	0	0	1	43	15132	44	44	0	0.00290775	15132	15132	44	44	0	0.00290775	15132
chr11	1265045	chr11	1243815				T	C	0.201959	0.319705	18713.2	0.0166667	0.00684748	120	14896	2	102	0	0	0	0	2	102	15016	104	104	0	0.00692595	15016	15016	104	104	0	0.00692595	15016
chr11	1265102	chr11	1243872	rs369774087			C	T	0.105693	0.214184	45512	0.00833333	0.000867476	120	14986	1	13	0	0	0	0	1	13	15106	14	14	0	0.000926784	15106	15106	14	14	0	0.000926784	15106
chr11	1265144	chr11	1243914	rs200113620			G	A	0.487055	0.598183	18159.5	0.00862069	0.005694	116	14928	1	85	0	0	0	0	1	85	15044	86	86	0	0.00571656	15044	15044	86	86	0	0.00571656	15044
chr11	1265695	chr11	1244465				GCCACCACACCCACAGCTACCAGCTTTACAGCCATCCCCTCCTCCTCCCTGGGCACCACCTGGACCCGCCTATCACAGA	*	0.283506	0.397832	2432.93	0	0.0182194	120	14984	0	273	0	0	0	0	0	273	15104	273	273	0	0.0180747	15104	15104	273	273	0	0.0180747	15104
chr11	1265695	chr11	1244465				GCCACCACACCCACAGCTACCAGCTTTACAGCCATCCCCTCCTCCTCCCTGGGCACCACCTGGACCCGCCTATCACAGA	G	1	1	2432.93	0	0.00106781	120	14984	0	16	0	0	0	0	0	16	15104	16	16	0	0.00105932	15104	15104	16	16	0	0.00105932	15104
chr11	1265712	chr11	1244482				TACCAGCTTTACAGCCATCCCCTCCTCCTCCCTGGGCACCACCTGGACCCGCCTATCACAGACC	T	1	1	78104.9	0.00877193	0.0159011	114	14716	1	234	0	0	0	0	1	234	14830	235	235	0	0.0158463	14830	14830	235	235	0	0.0158463	14830
chr11	1265712	chr11	1244482				TACCAGCTTTACAGCCATCCCCTCCTCCTCCCTGGGCACCACCTGGACCCGCCTATCACAGACC	*	1	1	78104.9	0	0.000543626	114	14716	0	8	0	0	0	0	0	8	14830	8	8	0	0.000539447	14830	14830	8	8	0	0.000539447	14830
chr11	1265858	chr11	1244628	rs202161651			C	T	0.139438	0.254078	373077	0.0166667	0.00536708	120	15092	2	81	0	0	0	0	2	81	15212	83	83	0	0.00545622	15212	15212	83	83	0	0.00545622	15212
chr11	1265993	chr11	1244763				G	T	0.442296	0.55307	28397.3	0.00833333	0.00480705	120	14978	1	72	0	0	0	0	1	72	15098	73	73	0	0.00483508	15098	15098	73	73	0	0.00483508	15098
chr11	1266007	chr11	1244777				T	C	0.468632	0.57969	24412.6	0.00833333	0.00520972	120	14972	1	78	0	0	0	0	1	78	15092	79	79	0	0.00523456	15092	15092	79	79	0	0.00523456	15092
chr11	1266085	chr11	1244855				C	G	0.186153	0.304654	61439.1	0.0169492	0.00659297	118	15016	2	99	0	0	0	0	2	99	15134	101	101	0	0.00667371	15134	15134	101	101	0	0.00667371	15134
chr11	1266089	chr11	1244859				C	G	0.508416	0.618903	33558.7	0.00862069	0.0060602	116	15016	1	91	0	0	0	0	1	91	15132	92	92	0	0.00607983	15132	15132	92	92	0	0.00607983	15132
chr11	1266182	chr11	1244952				C	T	0.130185	0.244942	49298.9	0.0254237	0.0104848	118	14974	3	157	0	0	0	0	3	157	15092	160	160	0	0.0106016	15092	15092	160	160	0	0.0106016	15092
chr11	1266892	chr11	1245662	rs199686584			C	G	0.772717	0.872791	586388	0.0166667	0.0260104	120	14994	2	390	0	0	0	2	2	388	15114	390	390	2	0.0259362	15114	15114	390	390	2	0.0259362	15114
chr11	1266892	chr11	1245662	rs199686584			C	T	0.557722	0.660259	586388	0.00833333	0.00673603	120	14994	1	101	0	0	0	0	1	101	15114	102	102	0	0.00674871	15114	15114	102	102	0	0.00674871	15114
chr11	1267093	chr11	1245863	rs199961794			G	A	0.728208	0.826157	437633	0.00847458	0.0185678	118	15026	1	279	0	0	0	0	1	279	15144	280	280	0	0.0184892	15144	15144	280	280	0	0.0184892	15144
chr11	1267115	chr11	1245885	rs200554635			C	A	0.332741	0.44344	277967	0.00833333	0.00331301	120	15092	1	50	0	0	0	0	1	50	15212	51	51	0	0.00335262	15212	15212	51	51	0	0.00335262	15212
chr11	1267115	chr11	1245885	rs200554635			C	T	1	1	277967	0	6.63E-05	120	15092	0	1	0	0	0	0	0	1	15212	1	1	0	6.57E-05	15212	15212	1	1	0	6.57E-05	15212
chr11	1267493	chr11	1246263	rs201554359			C	A	0.0234778	0.0899107	1697.8	0.00833333	0.000132503	120	15094	1	2	0	0	0	0	1	2	15214	3	3	0	0.000197187	15214	15214	3	3	0	0.000197187	15214
chr11	1267649	chr11	1246419				C	T	0.139761	0.254078	84324.5	0.00833333	0.00119253	120	15094	1	18	0	0	0	0	1	18	15214	19	19	0	0.00124885	15214	15214	19	19	0	0.00124885	15214
chr11	1267931	chr11	1246701	rs200413751			T	C	0.0436309	0.130137	4672.29	0.00892857	0.000333111	112	15010	1	5	0	0	0	0	1	5	15122	6	6	0	0.000396773	15122	15122	6	6	0	0.000396773	15122
chr11	1268297	chr11	1247067	rs202040871			C	T	0.13316	0.24623	88172.9	0.00833333	0.00112852	120	15064	1	17	0	0	0	0	1	17	15184	18	18	0	0.00118546	15184	15184	18	18	0	0.00118546	15184
chr11	1268450	chr11	1247220	.			TGCCGAACACCAC	*			75.9	.	0.00608988	0	14286	0	87	0	0	0	0	0	87	14286	87	87	0	0.00608988	14286	14286	87	87	0	0.00608988
chr11	1268456	chr11	1247226	rs200158850			A	C	1	1	184033	0	0.00606224	112	14846	0	90	0	0	0	0	0	90	14958	90	90	0	0.00601685	14958	14958	90	90	0	0.00601685	14958
chr11	1268456	chr11	1247226	rs200158850			A	AC	1	1	184033	0	0.00316584	112	14846	0	47	0	0	0	0	0	47	14958	47	47	0	0.00314213	14958	14958	47	47	0	0.00314213	14958
chr11	1268462	chr11	1247232	rs201116040			C	T	0.633836	0.735207	427780	0	0.0102892	114	14870	0	153	0	0	0	0	0	153	14984	153	153	0	0.0102109	14984	14984	153	153	0	0.0102109	14984
chr11	1268992	chr11	1247762	rs376672533			C	G	0.0379239	0.120472	9996.24	0.00862069	0.00026763	116	14946	1	4	0	0	0	0	1	4	15062	5	5	0	0.000331961	15062	15062	5	5	0	0.000331961	15062
chr11	1268992	chr11	1247762	rs376672533			C	T	1	1	9996.24	0	0.000133815	116	14946	0	2	0	0	0	0	0	2	15062	2	2	0	0.000132784	15062	15062	2	2	0	0.000132784	15062
chr11	1269442	chr11	1248212	rs199966165			G	A	0.638986	0.739936	156050	0	0.0106354	118	14668	0	156	0	0	0	16	0	140	14786	140	140	16	0.0105505	14786	14786	140	140	16	0.0105505	14786
chr11	1269458	chr11	1248228	rs201113104			G	T	0.631155	0.733332	231536	0	0.00943909	118	14726	0	139	0	0	0	16	0	123	14844	123	123	16	0.00936405	14844	14844	123	123	16	0.00936405	14844
chr11	1269461	chr11	1248231				GCACAGCCACCACACC	G	1	1	141243	0	0.00782086	120	14960	0	117	0	0	0	6	0	111	15080	111	111	6	0.00775862	15080	15080	111	111	6	0.00775862	15080
chr11	1269557	chr11	1248327	rs201948297			C	T	0.0834782	0.187876	24694.9	0.00833333	0.000662778	120	15088	1	10	0	0	0	0	1	10	15208	11	11	0	0.000723304	15208	15208	11	11	0	0.000723304	15208
chr11	1269601	chr11	1248371	rs190819085			G	T	0.20231	0.319705	119994	0.00877193	0.00192206	114	15088	1	29	0	0	0	0	1	29	15202	30	30	0	0.00197342	15202	15202	30	30	0	0.00197342	15202
chr11	1269662	chr11	1248432				C	T	0.193649	0.313202	6994.45	0.00862069	0.0017945	116	15046	1	27	0	0	0	0	1	27	15162	28	28	0	0.00184672	15162	15162	28	28	0	0.00184672	15162
chr11	1269668	chr11	1248438	rs184186640			C	A	0.466356	0.577913	495261	0.00833333	0.00517447	120	15074	1	78	0	0	0	8	1	70	15194	71	71	8	0.00519942	15194	15194	71	71	8	0.00519942	15194
chr11	1269722	chr11	1248492				C	T	0.380582	0.489218	16921.7	0.00862069	0.00406992	116	14988	1	61	0	0	0	0	1	61	15104	62	62	0	0.00410487	15104	15104	62	62	0	0.00410487	15104
chr11	1270171	chr11	1248941	rs200763458			C	A	0.60742	0.708143	17447.2	0.00862069	0.0079918	116	14640	1	117	0	0	0	0	1	117	14756	118	118	0	0.00799675	14756	14756	118	118	0	0.00799675	14756
chr11	1270214	chr11	1248984	rs202246021			C	T	0.285867	0.398971	34742.1	0.00833333	0.00274615	120	14930	1	41	0	0	0	0	1	41	15050	42	42	0	0.0027907	15050	15050	42	42	0	0.0027907	15050
chr11	1270475	chr11	1249245	rs371973587			C	T	0.133538	0.24623	64935.3	0.00833333	0.00113197	120	15018	1	17	0	0	0	0	1	17	15138	18	18	0	0.00118906	15138	15138	18	18	0	0.00118906	15138
chr11	1270663	chr11	1249433	rs3021164			G	C	0.022455	0.0899107	35116.8	0.0338983	0.00887216	118	14878	4	132	0	0	0	4	4	128	14996	132	132	4	0.00906909	14996	14996	132	132	4	0.00906909	14996
chr11	1270663	chr11	1249433	rs3021164			G	T	1	1	35116.8	0	0.000470493	118	14878	0	7	0	0	0	0	0	7	14996	7	7	0	0.000466791	14996	14996	7	7	0	0.000466791	14996
chr11	1270828	chr11	1249598	rs200770447			C	T	0.0762227	0.177231	35948.6	0.00833333	0.000596817	120	15080	1	9	0	0	0	0	1	9	15200	10	10	0	0.000657895	15200	15200	10	10	0	0.000657895	15200
chr11	1270904	chr11	1249674				C	G	0.0157256	0.0788654	2658.71	0.00833333	6.63E-05	120	15082	1	1	0	0	0	0	1	1	15202	2	2	0	0.000131562	15202	15202	2	2	0	0.000131562	15202
chr11	1271329	chr11	1250099	.			CCCACGGCCACCCCGTCCTCCACCCCAGGGACCACCTGGATCCTCACAGAGCTGACCACAACAGCCACTACGACTGCGTCCACTGGAT	*			852.94	.	0.000771713	0	14254	0	11	0	0	0	0	0	11	14254	11	11	0	0.000771713	14254	14254	11	11	0	0.000771713
chr11	1271329	chr11	1250099	.			CCCACGGCCACCCCGTCCTCCACCCCAGGGACCACCTGGATCCTCACAGAGCTGACCACAACAGCCACTACGACTGCGTCCACTGGAT	C			852.94	.	7.02E-05	0	14254	0	1	0	0	0	0	0	1	14254	1	1	0	7.02E-05	14254	14254	1	1	0	7.02E-05
chr11	1271363	chr11	1250133	rs199894226			C	T	0.248347	0.36957	218017	0.00833333	0.00231942	120	15090	1	35	0	0	0	2	1	33	15210	34	34	2	0.00236686	15210	15210	34	34	2	0.00236686	15210
chr11	1271363	chr11	1250133	rs199894226			C	*	1	1	218017	0	6.63E-05	120	15090	0	1	0	0	0	0	0	1	15210	1	1	0	6.57E-05	15210	15210	1	1	0	6.57E-05	15210
chr11	1271528	chr11	1250298				A	G	0.0370185	0.118631	655.94	0.00877193	0.000265675	114	15056	1	4	0	0	0	0	1	4	15170	5	5	0	0.000329598	15170	15170	5	5	0	0.000329598	15170
chr11	1271546	chr11	1250316				CA	C	0.056625	0.148911	105.69	0.0169492	0.00143678	118	696	2	1	0	0	0	0	2	1	814	3	3	0	0.0036855	814	814	3	3	0	0.0036855	814
chr11	1271546	chr11	1250316	.			C	T			8445.82	.	6.97E-05	0	14346	0	1	0	0	0	0	0	1	14346	1	1	0	6.97E-05	14346	14346	1	1	0	6.97E-05
chr11	1271546	chr11	1250316	.			CA	C			8445.82	.	0.00083647	0	14346	0	12	0	0	0	0	0	12	14346	12	12	0	0.00083647	14346	14346	12	12	0	0.00083647
chr11	1271549	chr11	1250319				A	AAAG	0.00446571	0.0663129	4080.33	0.0169492	0.000734312	118	14980	2	11	0	0	0	0	2	11	15098	13	13	0	0.000861041	15098	15098	13	13	0	0.000861041	15098
chr11	1271551	chr11	1250321				G	GC	0.00445194	0.0663129	4604.41	0.0169492	0.000733138	118	15004	2	11	0	0	0	0	2	11	15122	13	13	0	0.000859675	15122	15122	13	13	0	0.000859675	15122
chr11	1271555	chr11	1250325				G	C	0.00432585	0.0663129	3007.36	0.0172414	0.000734803	116	14970	2	11	0	0	0	0	2	11	15086	13	13	0	0.000861726	15086	15086	13	13	0	0.000861726	15086
chr11	1272696	chr11	1251466	rs182667095			T	TTCCACGGCCACCGCCTCCTCCACCCCAGGGACCACCTGGATCCTCACAGAGTCGAGCACTACAGCCACCGTGACGGTGCCCACCAGC	0.24299	0.363957	3410000	0.0166667	0.00778547	120	15028	2	117	0	0	0	2	2	115	15148	117	117	2	0.00785582	15148	15148	117	117	2	0.00785582	15148
chr11	1272696	chr11	1251466	rs182667095			T	TTCCACGGCCACTGCCTCCTCCACCCCAGGGACCACCTGGATCCTCACAGAGTCGAGCACTACAGCCACCGTGACGGTGCCCACCAGC	0.72648	0.825981	3410000	0.00833333	0.0174341	120	15028	1	262	0	0	0	6	1	256	15148	257	257	6	0.017362	15148	15148	257	257	6	0.017362	15148
chr11	1272696	chr11	1251466	rs182667095			T	A	0.0389917	0.120472	3410000	0.00833333	0.00026617	120	15028	1	4	0	0	0	0	1	4	15148	5	5	0	0.000330077	15148	15148	5	5	0	0.000330077	15148
chr11	1272696	chr11	1251466	rs182667095			T	C	1	1	3410000	0	0.00026617	120	15028	0	4	0	0	0	0	0	4	15148	4	4	0	0.000264061	15148	15148	4	4	0	0.000264061	15148
chr11	1272793	chr11	1251563	rs56159668			C	T	0.25713	0.376942	638630	0.0169492	0.00824468	118	15040	2	124	0	0	2	2	0	122	15158	122	122	4	0.00831244	15158	15158	122	122	4	0.00831244	15158
chr11	1272797	chr11	1251567	rs56368888			G	T	0.509885	0.619596	272091	0.00847458	0.00598245	118	15044	1	90	0	0	0	2	1	88	15162	89	89	2	0.00600185	15162	15162	89	89	2	0.00600185	15162
chr11	4107874	chr11	4086644				G	A	0.109435	0.217292	22141.2	0.00833333	0.000900152	120	14442	1	13	0	0	0	0	1	13	14562	14	14	0	0.000961406	14562	14562	14	14	0	0.000961406	14562
chr11	4108060	chr11	4086830				G	A	1	1	251888	0.00833333	0.0100387	120	11356	1	114	0	0	0	4	1	110	11476	111	111	4	0.0100209	11476	11476	111	111	4	0.0100209	11476
chr11	4112930	chr11	4091700	rs201466902			G	A	0.111949	0.218351	33452.9	0.00833333	0.000926661	120	15108	1	14	0	0	0	0	1	14	15228	15	15	0	0.000985028	15228	15228	15	15	0	0.000985028	15228
chr11	36594855	chr11	36573305	rs200575481			A	G	0.0106832	0.0663129	19692.8	0.0166667	0.00119253	120	15094	2	18	0	0	0	0	2	18	15214	20	20	0	0.00131458	15214	15214	20	20	0	0.00131458	15214
chr11	36595242	chr11	36573692				C	T	0.0234564	0.0899107	4113.78	0.00833333	0.00013238	120	15108	1	2	0	0	0	0	1	2	15228	3	3	0	0.000197006	15228	15228	3	3	0	0.000197006	15228
chr11	36614240	chr11	36592690				T	A	0.0834044	0.187876	19082.6	0.00833333	0.000662164	120	15102	1	10	0	0	0	0	1	10	15222	11	11	0	0.000722638	15222	15222	11	11	0	0.000722638	15222
chr11	45827569	chr11	45806018				C	T	0.0156989	0.0788654	1515.71	0.00833333	6.62E-05	120	15108	1	1	0	0	0	0	1	1	15228	2	2	0	0.000131337	15228	15228	2	2	0	0.000131337	15228
chr11	45832845	chr11	45811294	rs145613857			C	T	0.495734	0.605604	205137	0.00833333	0.00564559	120	15056	1	85	0	0	0	0	1	85	15176	86	86	0	0.00566684	15176	15176	86	86	0	0.00566684	15176
chr11	63978789	chr11	64211317				C	T	0.00788229	0.0663129	496.59	0.00833333	0	120	15104	1	0	0	0	0	0	1	0	15224	1	1	0	6.57E-05	15224	15224	1	1	0	6.57E-05	15224
chr11	65487516	chr11	65720045	rs61736590			C	A	0.197753	0.317476	327270	0.0166667	0.00675139	120	15108	2	102	0	0	0	2	2	100	15228	102	102	2	0.00682952	15228	15228	102	102	2	0.00682952	15228
chr11	67759196	chr11	67991725	rs2375178			A	C	0.0524283	0.144993	9594.04	0.0294118	0.0081123	102	14176	3	115	0	0	0	0	3	115	14278	118	118	0	0.00826446	14278	14278	118	118	0	0.00826446	14278
chr11	71712280	chr11	72001234	rs367559597			G	C	0.154847	0.271356	22806.5	0.00833333	0.00132042	120	11360	1	15	0	0	0	0	1	15	11480	16	16	0	0.00139373	11480	11480	16	16	0	0.00139373	11480
chr11	108117787	chr11	108247060	rs28904919			C	T	0.119175	0.227833	17059.8	0.00833333	0.000994827	120	15078	1	15	0	0	0	0	1	15	15198	16	16	0	0.00105277	15198	15198	16	16	0	0.00105277	15198
chr11	108155132	chr11	108284405	rs149711770			G	A	0.0464149	0.133784	8283.93	0.00833333	0.000331301	120	15092	1	5	0	0	0	0	1	5	15212	6	6	0	0.000394425	15212	15212	6	6	0	0.000394425	15212
chr11	108160516	chr11	108289789	rs34640941			A	G	0.0762033	0.177231	15552.5	0.00833333	0.000596659	120	15084	1	9	0	0	0	0	1	9	15204	10	10	0	0.000657722	15204	15204	10	10	0	0.000657722	15204
chr11	108186610	chr11	108315883	rs11212587			G	A	0.284794	0.398828	90585.5	0.00847458	0.00278146	118	15100	1	42	0	0	0	0	1	42	15218	43	43	0	0.0028256	15218	15218	43	43	0	0.0028256	15218
chr11	108196837	chr11	108326110	rs1800061			G	C	0.046379	0.133784	27063.5	0.00833333	0.000331038	120	15104	1	5	0	0	0	0	1	5	15224	6	6	0	0.000394115	15224	15224	6	6	0	0.000394115	15224
chr11	108196837	chr11	108326110	rs1800061			G	A	1	1	27063.5	0	0.000264831	120	15104	0	4	0	0	0	0	0	4	15224	4	4	0	0.000262743	15224	15224	4	4	0	0.000262743	15224
chr11	118175675	chr11	118304960				C	T	0.112102	0.218351	19427.2	0.00833333	0.000928013	120	15086	1	14	0	0	0	0	1	14	15206	15	15	0	0.000986453	15206	15206	15	15	0	0.000986453	15206
chr11	118307413	chr11	118436698				CGCG	C	1	1	33713.8	0.00847458	0.00966184	118	10764	1	104	0	0	0	0	1	104	10882	105	105	0	0.00964896	10882	10882	105	105	0	0.00964896	10882
chr11	118343360	chr11	118472645				A	T	0.051201	0.143362	10924.5	0.00833333	0.000352175	120	11358	1	4	0	0	0	0	1	4	11478	5	5	0	0.000435616	11478	11478	5	5	0	0.000435616	11478
chr11	118375779	chr11	118505064				G	A	0.0310403	0.10344	4071.31	0.00833333	0.000176087	120	11358	1	2	0	0	0	0	1	2	11478	3	3	0	0.00026137	11478	11478	3	3	0	0.00026137	11478
chr11	118896738	chr11	119026028				A	G	0.016329	0.0803622	2621.39	0.00833333	6.89E-05	120	14518	1	1	0	0	0	0	1	1	14638	2	2	0	0.000136631	14638	14638	2	2	0	0.000136631	14638
chr11	118922814	chr11	119052102	rs118151170			T	C	0.369007	0.482262	342151	0.0166667	0.0106477	120	11364	2	121	0	0	0	2	2	119	11484	121	121	2	0.0107106	11484	11484	121	121	2	0.0107106	11484
chr11	126162590	chr11	126292695	rs8177400			G	A	0.0570349	0.149418	189292	0.0166667	0.003113	120	15098	2	47	0	0	0	0	2	47	15218	49	49	0	0.00321987	15218	15218	49	49	0	0.00321987	15218
chr12	6442643	chr12	6333477	rs4149584			C	T	1	1	798979	0.0166667	0.017077	120	15108	2	258	0	0	0	8	2	250	15228	252	252	8	0.0170738	15228	15228	252	252	8	0.0170738	15228
chr12	7173893	chr12	7066589	rs117907409			G	A	0.547943	0.653171	216162	0.00833333	0.00655456	120	15104	1	99	0	0	0	0	1	99	15224	100	100	0	0.00656858	15224	15224	100	100	0	0.00656858	15224
chr12	7242740	chr12	7090144	rs139531404			C	G	0.479052	0.590076	169316	0.00833333	0.00536714	120	12856	1	69	0	0	0	0	1	69	12976	70	70	0	0.00539457	12976	12976	70	70	0	0.00539457	12976
chr12	48240232	chr12	47846449				C	T	0.00788229	0.0663129	634.59	0.00833333	0	120	15104	1	0	0	0	0	0	1	0	15224	1	1	0	6.57E-05	15224	15224	1	1	0	6.57E-05	15224
chr12	49433995	chr12	49040212				G	A	0.00788747	0.0663129	5695.86	0.00833333	0	120	15094	1	0	0	0	0	0	1	0	15214	1	1	0	6.57E-05	15214	15214	1	1	0	6.57E-05	15214
chr12	49437529	chr12	49043746				G	A	0.00788955	0.0663129	125.59	0.00833333	0	120	15090	1	0	0	0	0	0	1	0	15210	1	1	0	6.57E-05	15210	15210	1	1	0	6.57E-05	15210
chr12	64875677	chr12	64481897				G	C	0.00791348	0.0663129	343.59	0.00833333	0	120	15044	1	0	0	0	0	0	1	0	15164	1	1	0	6.59E-05	15164	15164	1	1	0	6.59E-05	15164
chr12	110011678	chr12	109573873				G	A	0.0410111	0.123978	2417.45	0.00833333	0.000234247	120	8538	1	2	0	0	0	0	1	2	8658	3	3	0	0.0003465	8658	8658	3	3	0	0.0003465	8658
chr12	113386742	chr12	112948937	rs201999183			G	T	0.0611456	0.152249	8848.67	0.00833333	0.000440373	120	11354	1	5	0	0	0	0	1	5	11474	6	6	0	0.000522921	11474	11474	6	6	0	0.000522921	11474
chr12	113416525	chr12	112978720	rs373240531			G	A	0.217811	0.336484	56368	0.00833333	0.00198702	120	15098	1	30	0	0	0	0	1	30	15218	31	31	0	0.00203706	15218	15218	31	31	0	0.00203706	15218
chr12	113440906	chr12	113003101	rs150642424			G	A	0.00794331	0.0663129	22497.7	0.0166667	0.00100563	120	14916	2	15	0	0	0	0	2	15	15036	17	17	0	0.00113062	15036	15036	17	17	0	0.00113062	15036
chr12	133067447	chr12	132490861				G	GAAGGATATGGCCCTGAAGCCACATGAGCGGAAGGAGAA	1	1	1586.15	0	0.00276243	120	724	0	2	0	0	0	0	0	2	844	2	2	0	0.00236967	844	844	2	2	0	0.00236967	844
chr12	133067447	chr12	132490861				G	GAAGGATATGGCCCTGAAGCCACATGAGCGGAAGGAGAAGTGGGAGCGTCGTCTCATCAAGAAGCCCCGGGAGTCGGAAACCTGCCCCCCTGCGGAGCCCA	1	1	1586.15	0	0.00414365	120	724	0	3	0	0	0	0	0	3	844	3	3	0	0.0035545	844	844	3	3	0	0.0035545	844
chr12	133084736	chr12	132508150	rs55934523			C	G			41328.4	.	0.0252008	0	9960	0	251	0	0	0	0	0	251	9960	251	251	0	0.0252008	9960	9960	251	251	0	0.0252008
chr12	133084874	chr12	132508288				G	A	0.0905703	0.196394	64752.1	0.00833333	0.000706714	120	11320	1	8	0	0	0	0	1	8	11440	9	9	0	0.000786713	11440	11440	9	9	0	0.000786713	11440
chr12	133150700	chr12	132574114	rs182041558			C	T	0.0115585	0.0698578	589.43	0.00833333	0	120	10262	1	0	0	0	0	0	1	0	10382	1	1	0	9.63E-05	10382	10382	1	1	0	9.63E-05	10382
chr12	133158014	chr12	132581428				G	GC	1	1	358579	0.00833333	0.00952549	120	11338	1	108	0	0	0	2	1	106	11458	107	107	2	0.009513	11458	11458	107	107	2	0.009513	11458
chr12	133160024	chr12	132583438				C	T	0.308517	0.420095	70555.9	0.00847458	0.0030416	118	10192	1	31	0	0	0	0	1	31	10310	32	32	0	0.00310378	10310	10310	32	32	0	0.00310378	10310
chr12	133160230	chr12	132583644				CT	C	0.140811	0.254643	655.61	0.00847458	0	118	720	1	0	0	0	0	0	1	0	838	1	1	0	0.00119332	838	838	1	1	0	0.00119332	838
chr12	133160230	chr12	132583644	.			CT	C			7131.94	.	0.000376979	0	7958	0	3	0	0	0	0	0	3	7958	3	3	0	0.000376979	7958	7958	3	3	0	0.000376979
chr12	133215796	chr12	132639210				G	A	0.0104548	0.0663129	420.59	0.00833333	0	120	11358	1	0	0	0	0	0	1	0	11478	1	1	0	8.71E-05	11478	11478	1	1	0	8.71E-05	11478
chr12	133218805	chr12	132642219				G	T	0.010484	0.0663129	457.59	0.00833333	0	120	11326	1	0	0	0	0	0	1	0	11446	1	1	0	8.74E-05	11446	11446	1	1	0	8.74E-05	11446
chr12	133226035	chr12	132649449	rs200398117			C	T	0.0182191	0.0882064	43460.1	0.0166667	0.00158507	120	11356	2	18	0	0	0	0	2	18	11476	20	20	0	0.00174277	11476	11476	20	20	0	0.00174277	11476
chr12	133263886	chr12	132687300	rs202220778			C	T	0.0105671	0.0663129	240765	0.00833333	0	120	11236	1	0	0	0	0	0	1	0	11356	1	1	0	8.81E-05	11356	11356	1	1	0	8.81E-05	11356
chr12	133263886	chr12	132687300	rs202220778			C	G	0.646781	0.747705	240765	0	0.011303	120	11236	0	127	0	0	0	4	0	123	11356	123	123	4	0.0111835	11356	11356	123	123	4	0.0111835	11356
chr13	32915204	chr13	32341067				G	A	0.105033	0.213474	23584.1	0.00833333	0.000861726	120	15086	1	13	0	0	0	0	1	13	15206	14	14	0	0.000920689	15206	15206	14	14	0	0.000920689	15206
chr13	103301441	chr13	102649091				A	G	0.00789578	0.0663129	364.59	0.00833333	0	120	15078	1	0	0	0	0	0	1	0	15198	1	1	0	6.58E-05	15198	15198	1	1	0	6.58E-05	15198
chr13	103320158	chr13	102667808	rs75588137			T	C	0.14218	0.25511	362.59	0.00833333	0	120	724	1	0	0	0	0	0	1	0	844	1	1	0	0.00118483	844	844	1	1	0	0.00118483	844
chr13	108863057	chr13	108210709	rs199854013			A	G	0.112005	0.218351	33823.7	0.00833333	0.000927152	120	15100	1	14	0	0	0	0	1	14	15220	15	15	0	0.000985545	15220	15220	15	15	0	0.000985545	15220
chr13	113470524	chr13	112816210				A	C	0.0104621	0.0663129	291.59	0.00833333	0	120	11350	1	0	0	0	0	0	1	0	11470	1	1	0	8.72E-05	11470	11470	1	1	0	8.72E-05	11470
chr13	113516758	chr13	112862444	rs141611036			G	A	0.155567	0.271356	133909	0.0166667	0.00573394	120	11336	2	65	0	0	0	4	2	61	11456	63	63	4	0.00584846	11456	11456	63	63	4	0.00584846	11456
chr13	113516785	chr13	112862471				C	T	0.0208084	0.0899107	3430.81	0.00833333	8.81E-05	120	11354	1	1	0	0	0	0	1	1	11474	2	2	0	0.000174307	11474	11474	2	2	0	0.000174307	11474
chr13	113530221	chr13	112875907	rs199958128			G	A	0.300911	0.412182	47640.3	0.00833333	0.00290646	120	11354	1	33	0	0	0	0	1	33	11474	34	34	0	0.00296322	11474	11474	34	34	0	0.00296322	11474
chr13	113536263	chr13	112881949				C	A	0.0108814	0.06694	66.61	0.00833333	0	120	10908	1	0	0	0	0	0	1	0	11028	1	1	0	9.07E-05	11028	11028	1	1	0	9.07E-05	11028
chr14	20944705	chr14	20476546				A	G	0.0821405	0.186782	14467.6	0.00847458	0.000662691	118	15090	1	10	0	0	0	0	1	10	15208	11	11	0	0.000723304	15208	15208	11	11	0	0.000723304	15208
chr14	23588246	chr14	23119037	rs200738630			C	G	0.0614853	0.152249	19335.8	0.00833333	0.000464437	120	15072	1	7	0	0	0	0	1	7	15192	8	8	0	0.000526593	15192	15192	8	8	0	0.000526593	15192
chr14	24617542	chr14	24148333	rs45466595			G	A	0.574352	0.674154	254615	0.00833333	0.00704225	120	11360	1	80	0	0	0	0	1	80	11480	81	81	0	0.00705575	11480	11480	81	81	0	0.00705575	11480
chr14	24621007	chr14	24151798	rs201014170			C	T	0.198639	0.317476	52817.9	0.00833333	0.00176523	120	11330	1	20	0	0	0	0	1	20	11450	21	21	0	0.00183406	11450	11450	21	21	0	0.00183406	11450
chr14	24709052	chr14	24239846	rs369249473			G	A	0.015703	0.0788654	2767.67	0.00833333	6.62E-05	120	15104	1	1	0	0	0	0	1	1	15224	2	2	0	0.000131372	15224	15224	2	2	0	0.000131372	15224
chr14	24711477	chr14	24242271	rs367835995			T	C	0.159964	0.276228	42440.3	0.00833333	0.0013911	120	15096	1	21	0	0	0	0	1	21	15216	22	22	0	0.00144585	15216	15216	22	22	0	0.00144585	15216
chr14	35484001	chr14	35014795				A	G	0.0104749	0.0663129	446.59	0.00833333	0	120	11336	1	0	0	0	0	0	1	0	11456	1	1	0	8.73E-05	11456	11456	1	1	0	8.73E-05	11456
chr14	45605405	chr14	45136202	rs142007602			G	C	0.353321	0.467695	123244	0.00833333	0.00357427	120	15108	1	54	0	0	0	2	1	52	15228	53	53	2	0.00361177	15228	15228	53	53	2	0.00361177	15228
chr14	45644672	chr14	45175469				A	T	0.114365	0.221964	17857.5	0.00833333	0.000947996	120	14768	1	14	0	0	0	0	1	14	14888	15	15	0	0.00100752	14888	14888	15	15	0	0.00100752	14888
chr14	64926552	chr14	64459834				A	G	0.0110926	0.0676356	4379.9	0.00833333	0	120	10698	1	0	0	0	0	0	1	0	10818	1	1	0	9.24E-05	10818	10818	1	1	0	9.24E-05	10818
chr14	64926552	chr14	64459834				ATAAG	A	1	1	4379.9	0	9.35E-05	120	10698	0	1	0	0	0	0	0	1	10818	1	1	0	9.24E-05	10818	10818	1	1	0	9.24E-05	10818
chr15	29561606	chr15	29269402	rs145058546			T	C	0.090313	0.196394	51587	0.00833333	0.000704598	120	11354	1	8	0	0	0	0	1	8	11474	9	9	0	0.000784382	11474	11474	9	9	0	0.000784382	11474
chr15	41272502	chr15	40980304	rs369975587			G	T	0.0101363	0.0663129	459.87	0.00862069	0	116	11328	1	0	0	0	0	0	1	0	11444	1	1	0	8.74E-05	11444	11444	1	1	0	8.74E-05	11444
chr15	41308365	chr15	41016167	rs34178030			A	C	0.687731	0.788431	415382	0.0166667	0.0141044	120	11344	2	160	0	0	0	10	2	150	11464	152	152	10	0.0141312	11464	11464	152	152	10	0.0141312	11464
chr15	41348875	chr15	41056677				T	C	0.0104712	0.0663129	729.59	0.00833333	0	120	11340	1	0	0	0	0	0	1	0	11460	1	1	0	8.73E-05	11460	11460	1	1	0	8.73E-05	11460
chr15	51032011	chr15	50739814	rs61752332			G	A	0.410005	0.518336	84186.4	0.00833333	0.00432251	120	11336	1	49	0	0	0	2	1	47	11456	48	48	2	0.00436452	11456	11456	48	48	2	0.00436452	11456
chr15	51032012	chr15	50739815	rs61752331			C	A	0.410005	0.518336	84186.3	0.00833333	0.00432251	120	11336	1	49	0	0	0	2	1	47	11456	48	48	2	0.00436452	11456	11456	48	48	2	0.00436452	11456
chr15	77321867	chr15	77029526				CAG	C	0.0157132	0.0788654	6174.7	0.00833333	6.63E-05	120	15094	1	1	0	0	0	0	1	1	15214	2	2	0	0.000131458	15214	15214	2	2	0	0.000131458	15214
chr15	89811698	chr15	89268467	rs142906652			T	C	0.0549959	0.146302	94588.8	0.0166667	0.00304716	120	15096	2	46	0	0	0	0	2	46	15216	48	48	0	0.00315457	15216	15216	48	48	0	0.00315457	15216
chr15	89825056	chr15	89281825	rs144908351			A	G	0.555279	0.658668	126866	0.00833333	0.00669051	120	15096	1	101	0	0	0	2	1	99	15216	100	100	2	0.00670347	15216	15216	100	100	2	0.00670347	15216
chr15	89843078	chr15	89299847				C	T	0.0234747	0.0899107	3134.37	0.00833333	0.000132485	120	15096	1	2	0	0	0	0	1	2	15216	3	3	0	0.000197161	15216	15216	3	3	0	0.000197161	15216
chr15	91292689	chr15	90749459	rs140382474			A	T	0.0834044	0.187876	13283.4	0.00833333	0.000662164	120	15102	1	10	0	0	0	0	1	10	15222	11	11	0	0.000722638	15222	15222	11	11	0	0.000722638	15222
chr15	91293225	chr15	90749995	rs201722470			A	G	0.0234778	0.0899107	8523.92	0.00833333	0.000132503	120	15094	1	2	0	0	0	0	1	2	15214	3	3	0	0.000197187	15214	15214	3	3	0	0.000197187	15214
chr15	91293225	chr15	90749995	rs201722470			AT	A	1	1	8523.92	0	6.63E-05	120	15094	0	1	0	0	0	0	0	1	15214	1	1	0	6.57E-05	15214	15214	1	1	0	6.57E-05	15214
chr15	91312735	chr15	90769505				C	T	0.104954	0.213474	23442.7	0.00833333	0.000861041	120	15098	1	13	0	0	0	0	1	13	15218	14	14	0	0.000919963	15218	15218	14	14	0	0.000919963	15218
chr15	93595249	chr15	93052019				C	T	0.00788436	0.0663129	356.59	0.00833333	0	120	15100	1	0	0	0	0	0	1	0	15220	1	1	0	6.57E-05	15220	15220	1	1	0	6.57E-05	15220
chr15	93595701	chr15	93052471				T	C	0.00798616	0.0663129	503.59	0.00833333	0	120	14906	1	0	0	0	0	0	1	0	15026	1	1	0	6.66E-05	15026	15026	1	1	0	6.66E-05	15026
chr16	1493697	chr16	1443696				C	T	0.033119	0.107131	4307.28	0.00833333	0.000188147	120	10630	1	2	0	0	0	0	1	2	10750	3	3	0	0.00027907	10750	10750	3	3	0	0.00027907	10750
chr16	3294535	chr16	3244535				T	C	0.0687796	0.16649	19517.2	0.00833333	0.000529801	120	15100	1	8	0	0	0	2	1	6	15220	7	7	2	0.000591327	15220	15220	7	7	2	0.000591327	15220
chr16	3299468	chr16	3249468	rs11466024			C	T	0.711098	0.81117	463863	0.0166667	0.0155588	120	15104	2	235	0	0	0	2	2	233	15224	235	235	2	0.0155675	15224	15224	235	235	2	0.0155675	15224
chr16	3299586	chr16	3249586	rs11466023			G	A	1	1	575356	0.00833333	0.0145637	120	15106	1	220	0	0	0	2	1	218	15226	219	219	2	0.0145146	15226	15226	219	219	2	0.0145146	15226
chr16	3639306	chr16	3589305				G	A	0.0315298	0.103448	4905.98	0.00833333	0.000201018	120	14924	1	3	0	0	0	0	1	3	15044	4	4	0	0.000265887	15044	15044	4	4	0	0.000265887	15044
chr16	3641280	chr16	3591279	rs140600202			C	T	0.300362	0.412182	100452	0.00833333	0.00291777	120	15080	1	44	0	0	0	0	1	44	15200	45	45	0	0.00296053	15200	15200	45	45	0	0.00296053	15200
chr16	3656645	chr16	3606644	rs147826749			A	G	0.22394	0.342425	84607	0.00833333	0.00205271	120	15102	1	31	0	0	0	0	1	31	15222	32	32	0	0.00210222	15222	15222	32	32	0	0.00210222	15222
chr16	3658881	chr16	3608880	rs144832924			G	A	0.161167	0.27761	148407	0.0166667	0.00589326	120	15102	2	89	0	0	0	0	2	89	15222	91	91	0	0.00597819	15222	15222	91	91	0	0.00597819	15222
chr16	10996039	chr16	10902182	rs368326813			C	T	0.316507	0.426249	72160.8	0.00833333	0.00311258	120	15100	1	47	0	0	0	2	1	45	15220	46	46	2	0.00315375	15220	15220	46	46	2	0.00315375	15220
chr16	11000497	chr16	10906640				C	A	0.0234625	0.0899107	8977.38	0.00833333	0.000132415	120	15104	1	2	0	0	0	0	1	2	15224	3	3	0	0.000197057	15224	15224	3	3	0	0.000197057	15224
chr16	11001033	chr16	10907176	rs199476070			G	A	0.00788126	0.0663129	369.59	0.00833333	0	120	15106	1	0	0	0	0	0	1	0	15226	1	1	0	6.57E-05	15226	15226	1	1	0	6.57E-05	15226
chr16	11004047	chr16	10910190				C	T	0.0234625	0.0899107	7098.37	0.00833333	0.000132415	120	15104	1	2	0	0	0	0	1	2	15224	3	3	0	0.000197057	15224	15224	3	3	0	0.000197057	15224
chr16	14649532	chr16	14555675	rs201782700			G	C	0.156002	0.271428	41060.1	0.00833333	0.0013312	120	11268	1	15	0	0	0	0	1	15	11388	16	16	0	0.00140499	11388	11388	16	16	0	0.00140499	11388
chr16	14704589	chr16	14610732	rs200103366			C	A	0.247413	0.368977	83027.4	0.00833333	0.00229035	120	11352	1	26	0	0	0	0	1	26	11472	27	27	0	0.00235356	11472	11472	27	27	0	0.00235356	11472
chr16	23631307	chr16	23619986	rs369444			G	C	0.20109	0.319242	24216.9	0.0916667	0.0606061	120	726	11	44	0	0	2	4	9	40	846	49	49	6	0.0650118	846	846	49	49	6	0.0650118	846
chr16	23634417	chr16	23623096				T	G	0.0311533	0.10344	2754.02	0.00833333	0.00019857	120	15108	1	3	0	0	0	0	1	3	15228	4	4	0	0.000262674	15228	15228	4	4	0	0.000262674	15228
chr16	23635348	chr16	23624027	rs45478192			A	C	0.217761	0.336484	54354.1	0.00833333	0.00198649	120	15102	1	30	0	0	0	0	1	30	15222	31	31	0	0.00203653	15222	15222	31	31	0	0.00203653	15222
chr16	23652466	chr16	23641145	rs377085677			G	A	0.112186	0.218351	31922.2	0.00833333	0.000928751	120	15074	1	14	0	0	0	0	1	14	15194	15	15	0	0.000987232	15194	15194	15	15	0	0.000987232	15194
chr16	27414502	chr16	27403181	rs117535117			G	A	0.18964	0.308727	229619	0.0166667	0.00656325	120	15084	2	99	0	0	0	0	2	99	15204	101	101	0	0.00664299	15204	15204	101	101	0	0.00664299	15204
chr16	27445755	chr16	27434434	rs137946070			C	T	0.555422	0.658668	129104	0.00833333	0.00669317	120	15090	1	101	0	0	0	0	1	101	15210	102	102	0	0.00670611	15210	15210	102	102	0	0.00670611	15210
chr16	27457366	chr16	27446045	rs52822694			G	A	1	1	341169	0.00833333	0.00848131	120	15092	1	128	0	0	0	0	1	128	15212	129	129	0	0.00848015	15212	15212	129	129	0	0.00848015	15212
chr16	28944271	chr16	28932950	rs146795664			T	G	0.0906469	0.196394	16775	0.00833333	0.000728477	120	15100	1	11	0	0	0	0	1	11	15220	12	12	0	0.000788436	15220	15220	12	12	0	0.000788436	15220
chr16	28998149	chr16	28986828	rs373418202			C	T	0.099934	0.20677	16721.2	0.00833333	0.000793511	120	11342	1	9	0	0	0	0	1	9	11462	10	10	0	0.000872448	11462	11462	10	10	0	0.000872448	11462
chr16	50741791	chr16	50707880	rs61755182			C	T	0.271693	0.386986	56987.6	0.00833333	0.00258278	120	15100	1	39	0	0	0	0	1	39	15220	40	40	0	0.00262812	15220	15220	40	40	0	0.00262812	15220
chr16	58054135	chr16	58020231	rs143382202			A	G	0.0538779	0.144993	8891.1	0.00833333	0.000397088	120	15110	1	6	0	0	0	0	1	6	15230	7	7	0	0.000459619	15230	15230	7	7	0	0.000459619	15230
chr16	67688103	chr16	67654200	rs189587636			G	A	0.231915	0.349702	23374.3	0.00833333	0.00211977	120	11322	1	24	0	0	0	0	1	24	11442	25	25	0	0.00218493	11442	11442	25	25	0	0.00218493	11442
chr16	74685955	chr16	74652057				G	A	0.109203	0.217292	23987.7	0.00833333	0.000880282	120	11360	1	10	0	0	0	0	1	10	11480	11	11	0	0.000958188	11480	11480	11	11	0	0.000958188	11480
chr16	74695034	chr16	74661136				C	A	0.0208156	0.0899107	6265.41	0.00833333	8.81E-05	120	11350	1	1	0	0	0	0	1	1	11470	2	2	0	0.000174368	11470	11470	2	2	0	0.000174368	11470
chr16	74695206	chr16	74661308				C	G	0.0310456	0.10344	7620.33	0.00833333	0.000176118	120	11356	1	2	0	0	0	0	1	2	11476	3	3	0	0.000261415	11476	11476	3	3	0	0.000261415	11476
chr16	81953258	chr16	81919653				C	T	0.00791452	0.0663129	657.59	0.00833333	0	120	15042	1	0	0	0	0	0	1	0	15162	1	1	0	6.60E-05	15162	15162	1	1	0	6.60E-05	15162
chr16	85953830	chr16	85920224	rs377181003			G	A	0.195353	0.315219	15450.1	0.00892857	0.00187455	112	13870	1	26	0	0	0	0	1	26	13982	27	27	0	0.00193105	13982	13982	27	27	0	0.00193105	13982
chr16	88713227	chr16	88646819	rs13306293			C	T			23520.5	.	0.000208565	0	14384	0	3	0	0	0	0	0	3	14384	3	3	0	0.000208565	14384	14384	3	3	0	0.000208565
chr16	88713227	chr16	88646819	rs13306293			CG	C			23520.5	.	6.95E-05	0	14384	0	1	0	0	0	0	0	1	14384	1	1	0	6.95E-05	14384	14384	1	1	0	6.95E-05
chr16	88713231	chr16	88646823				C	A	0.0157174	0.0788654	7790.71	0.00833333	6.63E-05	120	15090	1	1	0	0	0	0	1	1	15210	2	2	0	0.000131492	15210	15210	2	2	0	0.000131492	15210
chr16	89264923	chr16	89198515				G	A	0.0104822	0.0663129	711.59	0.00833333	0	120	11328	1	0	0	0	0	0	1	0	11448	1	1	0	8.74E-05	11448	11448	1	1	0	8.74E-05	11448
chr16	89265443	chr16	89199035				A	G	0.0104621	0.0663129	651.59	0.00833333	0	120	11350	1	0	0	0	0	0	1	0	11470	1	1	0	8.72E-05	11470	11470	1	1	0	8.72E-05	11470
chr16	89265821	chr16	89199413	rs184407156			G	A	0.0564459	0.148911	73607.9	0.0166667	0.00302297	120	8270	2	25	0	0	0	0	2	25	8390	27	27	0	0.00321812	8390	8390	27	27	0	0.00321812	8390
chr16	89818580	chr16	89752172	rs200022826			C	T	0.00788229	0.0663129	403.59	0.00833333	0	120	15104	1	0	0	0	0	0	1	0	15224	1	1	0	6.57E-05	15224	15224	1	1	0	6.57E-05	15224
chr16	89838086	chr16	89771678	rs1131660			C	A	0.220633	0.340081	619332	0.0416667	0.0242448	120	15096	5	366	0	0	0	10	5	356	15216	361	361	10	0.0243822	15216	15216	361	361	10	0.0243822	15216
chr16	89842176	chr16	89775768	rs139235751			C	G	1	1	293041	0.00833333	0.00962943	120	15058	1	145	0	0	0	0	1	145	15178	146	146	0	0.00961919	15178	15178	146	146	0	0.00961919	15178
chr16	89865577	chr16	89799169				C	A	0.0234594	0.0899107	7973.57	0.00833333	0.000132398	120	15106	1	2	0	0	0	0	1	2	15226	3	3	0	0.000197031	15226	15226	3	3	0	0.000197031	15226
chr16	89869889	chr16	89803481	rs55684453;rs71391245			T	TGA	0.683524	0.787255	9770.93	0.0166667	0.0138122	120	724	2	10	0	0	0	2	2	8	844	10	10	2	0.014218	844	844	10	10	2	0.014218	844
chr17	7604806	chr17	7701488				T	C	0.00788022	0.0663129	435.59	0.00833333	0	120	15108	1	0	0	0	0	0	1	0	15228	1	1	0	6.57E-05	15228	15228	1	1	0	6.57E-05	15228
chr17	7605682	chr17	7702364				G	A	0.00788333	0.0663129	1085.59	0.00833333	0	120	15102	1	0	0	0	0	0	1	0	15222	1	1	0	6.57E-05	15222	15222	1	1	0	6.57E-05	15222
chr17	16843666	chr17	16940352	rs104894649			C	T	0.0309665	0.10344	123327	0.0166667	0.00218543	120	15100	2	33	0	0	0	0	2	33	15220	35	35	0	0.00229961	15220	15220	35	35	0	0.00229961	15220
chr17	26087763	chr17	27760737	rs148088114			C	T	0.00167992	0.0663129	14069	0.0166667	0.000398142	120	15070	2	6	0	0	0	0	2	6	15190	8	8	0	0.000526662	15190	15190	8	8	0	0.000526662	15190
chr17	32579788	chr17	34252769	rs1024611			A	G	0.998314	1	121814	0.266667	0.266575	120	724	32	193	0	0	6	48	26	145	844	171	171	54	0.266588	844	844	171	171	54	0.266588	844
chr17	43559825	chr17	45482459	rs201283261			A	C	0.250338	0.37173	40791.2	0.00862069	0.00242326	116	14856	1	36	0	0	0	0	1	36	14972	37	37	0	0.00247128	14972	14972	37	37	0	0.00247128	14972
chr17	44109483	chr17	46032117	rs148203818			C	T	0.0907153	0.196394	37146.4	0.00833333	0.000729056	120	15088	1	11	0	0	0	0	1	11	15208	12	12	0	0.000789058	15208	15208	12	12	0	0.000789058	15208
chr17	56349062	chr17	58271701	rs182814920			C	T	0.186125	0.304654	50592.1	0.00833333	0.00165541	120	15102	1	25	0	0	0	0	1	25	15222	26	26	0	0.00170805	15222	15222	26	26	0	0.00170805	15222
chr17	56349107	chr17	58271746				C	T	0.00788229	0.0663129	7929.39	0.00833333	0	120	15104	1	0	0	0	0	0	1	0	15224	1	1	0	6.57E-05	15224	15224	1	1	0	6.57E-05	15224
chr17	56787304	chr17	58709943	rs147241704			G	A	0.22394	0.342425	47107.5	0.00833333	0.00205271	120	15102	1	31	0	0	0	0	1	31	15222	32	32	0	0.00210222	15222	15222	32	32	0	0.00210222	15222
chr17	59924572	chr17	61847211	rs4988345			G	A	0.0905877	0.196394	79164.1	0.0172414	0.00424798	116	15066	2	64	0	0	0	0	2	64	15182	66	66	0	0.00434725	15182	15182	66	66	0	0.00434725	15182
chr17	59934451	chr17	61857090				G	C	0.0157235	0.0788654	4964.82	0.00833333	6.63E-05	120	15084	1	1	0	0	0	0	1	1	15204	2	2	0	0.000131544	15204	15204	2	2	0	0.000131544	15204
chr17	73825036	chr17	75828955	rs138760432			C	G	0.0312019	0.10344	10940.8	0.00833333	0.000198886	120	15084	1	3	0	0	0	0	1	3	15204	4	4	0	0.000263089	15204	15204	4	4	0	0.000263089	15204
chr17	73827335	chr17	75831254	rs144968313			T	G	0.0311492	0.10344	14734.5	0.00833333	0.000198544	120	15110	1	3	0	0	0	0	1	3	15230	4	4	0	0.00026264	15230	15230	4	4	0	0.00026264	15230
chr17	76117127	chr17	78121046				G	A	0.0312262	0.10344	14543.1	0.00833333	0.000199045	120	15072	1	3	0	0	0	0	1	3	15192	4	4	0	0.000263296	15192	15192	4	4	0	0.000263296	15192
chr17	78176192	chr17	80202393	rs147578051			C	T	0.0978713	0.205477	21092.8	0.00833333	0.000795123	120	15092	1	12	0	0	0	0	1	12	15212	13	13	0	0.000854588	15212	15212	13	13	0	0.000854588	15212
chr18	2920361	chr18	2920363	rs201160155			C	A	0.146466	0.260762	49932.9	0.00833333	0.00125794	120	15104	1	19	0	0	0	0	1	19	15224	20	20	0	0.00131372	15224	15224	20	20	0	0.00131372	15224
chr18	2925284	chr18	2925286	rs150806357			G	A	0.416934	0.523256	148416	0.00833333	0.00443709	120	15100	1	67	0	0	0	0	1	67	15220	68	68	0	0.00446781	15220	15220	68	68	0	0.00446781	15220
chr18	2926779	chr18	2926781	rs150022314			A	G	0.457123	0.569544	116419	0.00833333	0.00503178	120	15104	1	76	0	0	0	0	1	76	15224	77	77	0	0.0050578	15224	15224	77	77	0	0.0050578	15224
chr18	2929103	chr18	2929105	rs104895500			G	A	0.540873	0.64586	122810	0.00833333	0.00642554	120	15096	1	97	0	0	0	2	1	95	15216	96	96	2	0.00644059	15216	15216	96	96	2	0.00644059	15216
chr18	2960729	chr18	2960731				T	C	0.0231197	0.0899107	1329.84	0.00847458	0.000132661	118	15076	1	2	0	0	0	0	1	2	15194	3	3	0	0.000197446	15194	15194	3	3	0	0.000197446	15194
chr18	12703140	chr18	12703141	rs138672454			C	T	0.189986	0.308727	45546.6	0.00833333	0.00167549	120	11340	1	19	0	0	0	0	1	19	11460	20	20	0	0.0017452	11460	11460	20	20	0	0.0017452	11460
chr18	43458374	chr18	45878409				T	G	0.109384	0.217292	18808.4	0.00833333	0.000881834	120	11340	1	10	0	0	0	0	1	10	11460	11	11	0	0.00095986	11460	11460	11	11	0	0.00095986	11460
chr18	43467768	chr18	45887803	rs375463159			C	T	0.0904188	0.196394	22814.1	0.00833333	0.000705467	120	11340	1	8	0	0	0	0	1	8	11460	9	9	0	0.00078534	11460	11460	9	9	0	0.00078534	11460
chr18	43535154	chr18	45955188	rs201067154			C	T	0.127851	0.241341	23281.5	0.00833333	0.00105727	120	11350	1	12	0	0	0	0	1	12	11470	13	13	0	0.00113339	11470	11470	13	13	0	0.00113339	11470
chr18	47363125	chr18	49836755	rs200931302			C	T	0.0539471	0.144993	8425.93	0.00833333	0.000397614	120	15090	1	6	0	0	0	0	1	6	15210	7	7	0	0.000460224	15210	15210	7	7	0	0.000460224	15210
chr18	47364071	chr18	49837701	rs201466306			A	T	0.146412	0.260762	55438.5	0.00833333	0.00125745	120	15110	1	19	0	0	0	0	1	19	15230	20	20	0	0.0013132	15230	15230	20	20	0	0.0013132	15230
chr18	47376012	chr18	49849642	rs76213287			C	T	0.0388051	0.120472	5004.59	0.00833333	0.000264866	120	15102	1	4	0	0	0	0	1	4	15222	5	5	0	0.000328472	15222	15222	5	5	0	0.000328472	15222
chr18	47390716	chr18	49864346	rs201651982			T	A	0.0983273	0.205477	19429.4	0.00833333	0.000799041	120	15018	1	12	0	0	0	0	1	12	15138	13	13	0	0.000858766	15138	15138	13	13	0	0.000858766	15138
chr18	47431164	chr18	49904794				C	G	0.0234656	0.0899107	4376.79	0.00833333	0.000132433	120	15102	1	2	0	0	0	0	1	2	15222	3	3	0	0.000197083	15222	15222	3	3	0	0.000197083	15222
chr18	57106979	chr18	59439747	rs140813794			C	T	0.0613831	0.152249	20823.7	0.00833333	0.000463638	120	15098	1	7	0	0	0	0	1	7	15218	8	8	0	0.000525693	15218	15218	8	8	0	0.000525693	15218
chr18	60036694	chr18	62369461				C	A	0.00841397	0.0663129	3396.75	0.00833333	0	120	14142	1	0	0	0	0	0	1	0	14262	1	1	0	7.01E-05	14262	14262	1	1	0	7.01E-05	14262
chr18	60052034	chr18	62384801	rs117028614			A	G	0.229991	0.348998	95552	0.00833333	0.00211808	120	15108	1	32	0	0	0	0	1	32	15228	33	33	0	0.00216706	15228	15228	33	33	0	0.00216706	15228
chr19	860766	chr19	860766	rs35186399			G	A	0.0679435	0.16649	99310.2	0.0166667	0.00345194	120	15064	2	52	0	0	0	2	2	50	15184	52	52	2	0.00355638	15184	15184	52	52	2	0.00355638	15184
chr19	1612307	chr19	1612308	rs200433738			C	T	0.0104566	0.0663129	678.59	0.00833333	0	120	11356	1	0	0	0	0	0	1	0	11476	1	1	0	8.71E-05	11476	11476	1	1	0	8.71E-05	11476
chr19	1621861	chr19	1621862	rs370910718			C	G	0.0513148	0.143362	10664.9	0.00833333	0.000352983	120	11332	1	4	0	0	0	0	1	4	11452	5	5	0	0.000436605	11452	11452	5	5	0	0.000436605	11452
chr19	1621872	chr19	1621873	rs370625466			T	C	0.0513939	0.143362	11226	0.00833333	0.000353544	120	11314	1	4	0	0	0	0	1	4	11434	5	5	0	0.000437292	11434	11434	5	5	0	0.000437292	11434
chr19	1622111	chr19	1622112				G	A	0.0787726	0.181519	16030.5	0.00862069	0.000621891	116	11256	1	7	0	0	0	0	1	7	11372	8	8	0	0.000703482	11372	11372	8	8	0	0.000703482	11372
chr19	2113334	chr19	2113335				C	G	0.00597713	0.0663129	169.71	0.0217391	0	46	7650	1	0	0	0	0	0	1	0	7696	1	1	0	0.000129938	7696	7696	1	1	0	0.000129938	7696
chr19	2114145	chr19	2114146	rs375962470			C	A	0.0208084	0.0899107	2013.27	0.00833333	8.81E-05	120	11354	1	1	0	0	0	0	1	1	11474	2	2	0	0.000174307	11474	11474	2	2	0	0.000174307	11474
chr19	4816688	chr19	4816676	rs143679494			C	T	0.562361	0.664608	351663	0.00833333	0.0068239	120	15094	1	103	0	0	0	2	1	101	15214	102	102	2	0.00683581	15214	15214	102	102	2	0.00683581	15214
chr19	6590945	chr19	6590934				C	A	0.0611767	0.152249	11729.7	0.00833333	0.000440606	120	11348	1	5	0	0	0	0	1	5	11468	6	6	0	0.000523195	11468	11468	6	6	0	0.000523195	11468
chr19	6679480	chr19	6679469	rs368362113			G	A	0.0388101	0.120472	11845.6	0.00833333	0.000264901	120	15100	1	4	0	0	0	0	1	4	15220	5	5	0	0.000328515	15220	15220	5	5	0	0.000328515	15220
chr19	6707913	chr19	6707902	rs144432231			T	A	0.0311735	0.10344	14607.6	0.00833333	0.000198702	120	15098	1	3	0	0	0	0	1	3	15218	4	4	0	0.000262847	15218	15218	4	4	0	0.000262847	15218
chr19	6711044	chr19	6711033				C	A	0.0979572	0.205477	17001.9	0.00833333	0.000795862	120	15078	1	12	0	0	0	0	1	12	15198	13	13	0	0.000855376	15198	15198	13	13	0	0.000855376	15198
chr19	7711222	chr19	7646336				G	A	0.0749107	0.176759	37615.7	0.00847458	0.000596026	118	15100	1	9	0	0	0	0	1	9	15218	10	10	0	0.000657117	15218	15218	10	10	0	0.000657117	15218
chr19	10426563	chr19	10315887				A	C	0.00782269	0.0663129	49.16	0.0416667	0	24	3044	1	0	0	0	0	0	1	0	3068	1	1	0	0.000325945	3068	3068	1	1	0	0.000325945	3068
chr19	10429038	chr19	10318362				G	A	0.137366	0.251716	23878.7	0.00833333	0.00114882	120	11316	1	13	0	0	0	0	1	13	11436	14	14	0	0.0012242	11436	11436	14	14	0	0.0012242	11436
chr19	10444074	chr19	10333398	rs34642407			G	A	0.409512	0.518336	173025	0.00833333	0.00431566	120	11354	1	49	0	0	0	0	1	49	11474	50	50	0	0.00435768	11474	11474	50	50	0	0.00435768	11474
chr19	10472988	chr19	10362312				C	T	0.0311492	0.10344	8751.03	0.00833333	0.000198544	120	15110	1	3	0	0	0	0	1	3	15230	4	4	0	0.00026264	15230	15230	4	4	0	0.00026264	15230
chr19	10473066	chr19	10362390				C	T	0.0156989	0.0788654	2369.71	0.00833333	6.62E-05	120	15108	1	1	0	0	0	0	1	1	15228	2	2	0	0.000131337	15228	15228	2	2	0	0.000131337	15228
chr19	11685989	chr19	11575174	rs147025508			G	A	0.206447	0.32372	270775	0.0166667	0.0069518	120	15104	2	105	0	0	0	0	2	105	15224	107	107	0	0.00702838	15224	15224	107	107	0	0.00702838	15224
chr19	17881605	chr19	17770796	rs148568413			A	G	0.0104234	0.0663129	13525.6	0.0166667	0.00114517	120	11352	2	13	0	0	0	0	2	13	11472	15	15	0	0.00130753	11472	11472	15	15	0	0.00130753	11472
chr19	17895630	chr19	17784821	rs138123386			C	T	0.136919	0.251566	64069.8	0.00833333	0.00114477	120	11356	1	13	0	0	0	0	1	13	11476	14	14	0	0.00121994	11476	11476	14	14	0	0.00121994	11476
chr19	19307799	chr19	19196990				C	T	0.0687533	0.16649	13508.2	0.00833333	0.000529591	120	15106	1	8	0	0	0	0	1	8	15226	9	9	0	0.000591094	15226	15226	9	9	0	0.000591094	15226
chr19	33882259	chr19	33391353	rs200183031			G	A	0.283068	0.397832	191490	0.00833333	0.00271415	120	15106	1	41	0	0	0	2	1	39	15226	40	40	2	0.00275844	15226	15226	40	40	2	0.00275844	15226
chr19	41224173	chr19	40718268				G	GCGATCC	0.0763973	0.177231	24538.2	0.00833333	0.000598245	120	15044	1	9	0	0	0	0	1	9	15164	10	10	0	0.000659457	15164	15164	10	10	0	0.000659457	15164
chr19	42383694	chr19	41879624				G	A	0.00788644	0.0663129	445.59	0.00833333	0	120	15096	1	0	0	0	0	0	1	0	15216	1	1	0	6.57E-05	15216	15216	1	1	0	6.57E-05	15216
chr19	42410623	chr19	41906471	rs45580632			C	G	0.231951	0.349702	64740.6	0.00833333	0.00212014	120	11320	1	24	0	0	0	0	1	24	11440	25	25	0	0.00218531	11440	11440	25	25	0	0.00218531	11440
chr19	42410928	chr19	41906776				G	A	0.02083	0.0899107	562.81	0.00833333	8.82E-05	120	11342	1	1	0	0	0	0	1	1	11462	2	2	0	0.00017449	11462	11462	2	2	0	0.00017449	11462
chr19	48639335	chr19	48136078				A	C	0.0157132	0.0788654	3758.72	0.00833333	6.63E-05	120	15094	1	1	0	0	0	0	1	1	15214	2	2	0	0.000131458	15214	15214	2	2	0	0.000131458	15214
chr19	48653093	chr19	48149836	rs55686525			G	A	0.0615089	0.152249	11945.5	0.00833333	0.000464622	120	15066	1	7	0	0	0	0	1	7	15186	8	8	0	0.000526801	15186	15186	8	8	0	0.000526801	15186
chr19	48660361	chr19	48157104	rs139413667			G	A	0.0744921	0.176503	91175.3	0.0166667	0.00364673	120	15082	2	55	0	0	0	0	2	55	15202	57	57	0	0.00374951	15202	15202	57	57	0	0.00374951	15202
chr19	49206625	chr19	48703368	rs1800022			C	T	0.0402119	0.123138	352602	0.025	0.00615731	120	15104	3	93	0	0	0	0	3	93	15224	96	96	0	0.00630583	15224	15224	96	96	0	0.00630583	15224
chr19	49206937	chr19	48703680				A	G	0.00788126	0.0663129	645.59	0.00833333	0	120	15106	1	0	0	0	0	0	1	0	15226	1	1	0	6.57E-05	15226	15226	1	1	0	6.57E-05	15226
chr19	49355570	chr19	48852313				A	G	0.0205382	0.0899107	1797.88	0.00847458	8.84E-05	118	11314	1	1	0	0	0	0	1	1	11432	2	2	0	0.000174948	11432	11432	2	2	0	0.000174948	11432
chr19	49362772	chr19	48859515	rs35473731			T	C	0.267211	0.382762	86615	0.00847458	0.00255687	118	11342	1	29	0	0	0	0	1	29	11460	30	30	0	0.0026178	11460	11460	30	30	0	0.0026178	11460
chr19	49362915	chr19	48859658				G	A	0.0806782	0.184768	22583.6	0.00833333	0.000616414	120	11356	1	7	0	0	0	0	1	7	11476	8	8	0	0.000697107	11476	11476	8	8	0	0.000697107	11476
chr19	50165277	chr19	49662020	rs368333462			C	T	0.109203	0.217292	36235.9	0.00833333	0.000880282	120	11360	1	10	0	0	0	0	1	10	11480	11	11	0	0.000958188	11480	11480	11	11	0	0.000958188	11480
chr19	52249689	chr19	51746436	rs139760904			G	A	0.0978345	0.205477	29423.6	0.00833333	0.000794807	120	15098	1	12	0	0	0	0	1	12	15218	13	13	0	0.000854252	15218	15218	13	13	0	0.000854252	15218
chr19	52272321	chr19	51769068	rs144927349			G	A	0.311262	0.422998	146962	0.00833333	0.00304878	120	15088	1	46	0	0	0	0	1	46	15208	47	47	0	0.00309048	15208	15208	47	47	0	0.00309048	15208
chr19	52272659	chr19	51769406	rs199504632			T	C	0.00788747	0.0663129	270.59	0.00833333	0	120	15094	1	0	0	0	0	0	1	0	15214	1	1	0	6.57E-05	15214	15214	1	1	0	6.57E-05	15214
chr19	52272799	chr19	51769546	rs200897681			C	G	0.0539194	0.144993	10685.2	0.00833333	0.000397404	120	15098	1	6	0	0	0	0	1	6	15218	7	7	0	0.000459982	15218	15218	7	7	0	0.000459982	15218
chr2	9661450	chr2	9521321	rs201461814			A	G	0.0326865	0.106231	106359	0.025	0.0056546	120	15032	3	85	0	0	0	2	3	83	15152	86	86	2	0.00580781	15152	15152	86	86	2	0.00580781	15152
chr2	15448413	chr2	15308289				G	A	0.327277	0.437852	99010.4	0.00833333	0.00324503	120	15100	1	49	0	0	0	0	1	49	15220	50	50	0	0.00328515	15220	15220	50	50	0	0.00328515	15220
chr2	15448413	chr2	15308289				G	C	1	1	99010.4	0	6.62E-05	120	15100	0	1	0	0	0	0	0	1	15220	1	1	0	6.57E-05	15220	15220	1	1	0	6.57E-05	15220
chr2	15468426	chr2	15328302	rs148644578			C	T	0.227591	0.346926	38637.2	0.00847458	0.00212823	118	15036	1	32	0	0	0	0	1	32	15154	33	33	0	0.00217764	15154	15154	33	33	0	0.00217764	15154
chr2	15468427	chr2	15328303				A	C	0.0236164	0.0899107	13628.8	0.00833333	0.000133298	120	15004	1	2	0	0	0	0	1	2	15124	3	3	0	0.00019836	15124	15124	3	3	0	0.00019836	15124
chr2	15468433	chr2	15328309				G	C	0.0235207	0.0899107	15150.5	0.00833333	0.000132749	120	15066	1	2	0	0	0	0	1	2	15186	3	3	0	0.00019755	15186	15186	3	3	0	0.00019755	15186
chr2	15701421	chr2	15561297	rs202150793			G	T	1	1	222200	0.00833333	0.00931718	120	15026	1	140	0	0	0	0	1	140	15146	141	141	0	0.00930939	15146	15146	141	141	0	0.00930939	15146
chr2	32474895	chr2	32249826				G	C	0.20673	0.32372	23864.6	0.00833333	0.00185022	120	11350	1	21	0	0	0	0	1	21	11470	22	22	0	0.00191805	11470	11470	22	22	0	0.00191805	11470
chr2	32476161	chr2	32251092				A	G	0.031051	0.10344	4947.35	0.00833333	0.000176149	120	11354	1	2	0	0	0	0	1	2	11474	3	3	0	0.000261461	11474	11474	3	3	0	0.000261461	11474
chr2	47273468	chr2	47046329	rs139010200			A	G	0.371671	0.482262	103612	0.00833333	0.00379724	120	11324	1	43	0	0	0	0	1	43	11444	44	44	0	0.00384481	11444	11444	44	44	0	0.00384481	11444
chr2	47277182	chr2	47050043	rs149602485			T	C	0.371158	0.482262	102735	0.00833333	0.00379055	120	11344	1	43	0	0	0	0	1	43	11464	44	44	0	0.0038381	11464	11464	44	44	0	0.0038381	11464
chr2	58386928	chr2	58159793				G	GTAAT	0.515703	0.624463	210457	0.00833333	0.00598166	120	15046	1	90	0	0	0	0	1	90	15166	91	91	0	0.00600026	15166	15166	91	91	0	0.00600026	15166
chr2	61148891	chr2	60921756	rs142878172			C	A	1	1	188694	0.00833333	0.0112721	120	11178	1	126	0	0	0	0	1	126	11298	127	127	0	0.0112409	11298	11298	127	127	0	0.0112409	11298
chr2	74752619	chr2	74525492				C	G	0.0104676	0.0663129	880.59	0.00833333	0	120	11344	1	0	0	0	0	0	1	0	11464	1	1	0	8.72E-05	11464	11464	1	1	0	8.72E-05	11464
chr2	74757449	chr2	74530322				T	G	0.0237926	0.0900721	244.04	0.0131579	0.000238322	76	12588	1	3	0	0	0	0	1	3	12664	4	4	0	0.000315856	12664	12664	4	4	0	0.000315856	12664
chr2	109345582	chr2	108729126	rs201485597			T	A	0.318131	0.427275	70039.8	0.00833333	0.00313208	120	15006	1	47	0	0	0	0	1	47	15126	48	48	0	0.00317334	15126	15126	48	48	0	0.00317334	15126
chr2	109384746	chr2	108768290	rs138022657			A	G	0.458266	0.569938	250708	0.00833333	0.00504916	120	15052	1	76	0	0	0	0	1	76	15172	77	77	0	0.00507514	15172	15172	77	77	0	0.00507514	15172
chr2	109388151	chr2	108771695	rs183569993			T	G	0.533318	0.639054	129827	0.00847458	0.00639659	118	15008	1	96	0	0	0	0	1	96	15126	97	97	0	0.0064128	15126	15126	97	97	0	0.0064128	15126
chr2	122288463	chr2	121530887	rs370715569			CT	C	1	1	3404.42	0	0.000185943	120	5378	0	1	0	0	0	0	0	1	5498	1	1	0	0.000181884	5498	5498	1	1	0	0.000181884	5498
chr2	136872992	chr2	136115422	rs371317659			A	G	0.111977	0.218351	37514.7	0.00833333	0.000926907	120	15104	1	14	0	0	0	0	1	14	15224	15	15	0	0.000985286	15224	15224	15	15	0	0.000985286	15224
chr2	136873503	chr2	136115933				T	C	0.00789578	0.0663129	305.59	0.00833333	0	120	15078	1	0	0	0	0	0	1	0	15198	1	1	0	6.58E-05	15198	15198	1	1	0	6.58E-05	15198
chr2	163124024	chr2	162267514	rs144455277			G	C	0.26604	0.382439	72565.4	0.00833333	0.00251822	120	15090	1	38	0	0	0	2	1	36	15210	37	37	2	0.0025641	15210	15210	37	37	2	0.0025641	15210
chr2	163124596	chr2	162268086	rs35732034			C	T	1	1	230720	0.00833333	0.00964114	120	14936	1	144	0	0	0	2	1	142	15056	143	143	2	0.00963071	15056	15056	143	143	2	0.00963071	15056
chr2	163134090	chr2	162277580	rs35744605			C	A	1	1	269620	0.00833333	0.00936628	120	15054	1	141	0	0	0	2	1	139	15174	140	140	2	0.00935811	15174	15174	140	140	2	0.00935811	15174
chr2	178096581	chr2	177231853				A	T	0.0157194	0.0788654	1975.7	0.00833333	6.63E-05	120	15088	1	1	0	0	0	0	1	1	15208	2	2	0	0.00013151	15208	15208	2	2	0	0.00013151	15208
chr2	187534489	chr2	186669762				A	G	0.0208192	0.0899107	3059.78	0.00833333	8.81E-05	120	11348	1	1	0	0	0	0	1	1	11468	2	2	0	0.000174398	11468	11468	2	2	0	0.000174398	11468
chr2	191862697	chr2	190997971				T	A	0.0078854	0.0663129	2369.75	0.00833333	0	120	15098	1	0	0	0	0	0	1	0	15218	1	1	0	6.57E-05	15218	15218	1	1	0	6.57E-05	15218
chr2	202122877	chr2	201258154				GGTTCTCCTCCTTTTATCTTTTGTGTTTTTTTTCAAGCCCTGCTGAATTTGCTAGTCAACTCAACAGGAAGTGAGGCCATGGAGGGAGGCAGAAGAGCCAGGGTGGTTATTGA	G	0.264273	0.382439	360.4	0.00847458	0.00140449	118	712	1	1	0	0	0	0	1	1	830	2	2	0	0.00240964	830	830	2	2	0	0.00240964	830
chr2	224642495	chr2	223777778	rs78536455			G	A	0.0837126	0.187876	101707	0.0166667	0.00388418	120	11328	2	44	0	0	0	2	2	42	11448	44	44	2	0.00401817	11448	11448	44	44	2	0.00401817	11448
chr2	231079676	chr2	230214961				C	T	0.112088	0.218351	21380.9	0.00833333	0.00092789	120	15088	1	14	0	0	0	0	1	14	15208	15	15	0	0.000986323	15208	15208	15	15	0	0.000986323	15208
chr20	400012	chr20	419368				C	T	0.0612183	0.152249	4314.68	0.00833333	0.000440917	120	11340	1	5	0	0	0	0	1	5	11460	6	6	0	0.00052356	11460	11460	6	6	0	0.00052356	11460
chr20	402851	chr20	422207	rs143194967			C	T	0.181199	0.300111	62547.7	0.00833333	0.00158534	120	11354	1	18	0	0	0	0	1	18	11474	19	19	0	0.00165592	11474	11474	19	19	0	0.00165592	11474
chr20	6064805	chr20	6084158	rs2232078			C	T	0.167209	0.281681	209450	0.0166667	0.00603688	120	15074	2	91	0	0	0	4	2	87	15194	89	89	4	0.00612084	15194	15194	89	89	4	0.00612084	15194
chr20	23028640	chr20	23048003	rs1800579			G	A	0.416726	0.523256	249896	0.00833333	0.00443415	120	15110	1	67	0	0	0	0	1	67	15230	68	68	0	0.00446487	15230	15230	68	68	0	0.00446487	15230
chr20	25422396	chr20	25441760				TA	T	0.303749	0.415244	8137.98	0.00833333	0.0029374	120	10894	1	32	0	0	0	0	1	32	11014	33	33	0	0.00299619	11014	11014	33	33	0	0.00299619	11014
chr20	25422396	chr20	25441760				T	TA	1	1	8137.98	0	0.00156049	120	10894	0	17	0	0	0	0	0	17	11014	17	17	0	0.00154349	11014	11014	17	17	0	0.00154349	11014
chr20	31368196	chr20	32780390	rs367766007			G	A	0.015703	0.0788654	4776.68	0.00833333	6.62E-05	120	15104	1	1	0	0	0	0	1	1	15224	2	2	0	0.000131372	15224	15224	2	2	0	0.000131372	15224
chr20	31368202	chr20	32780396	rs151128145			G	A	0.153221	0.269641	79969.1	0.00833333	0.00132433	120	15102	1	20	0	0	0	0	1	20	15222	21	21	0	0.00137958	15222	15222	21	21	0	0.00137958	15222
chr20	31374372	chr20	32786566				C	T	0.0157071	0.0788654	1178.68	0.00833333	6.62E-05	120	15100	1	1	0	0	0	0	1	1	15220	2	2	0	0.000131406	15220	15220	2	2	0	0.000131406	15220
chr20	32341032	chr20	33753226	rs372492319			C	T	0.0711499	0.170216	13852.7	0.00833333	0.000529848	120	11324	1	6	0	0	0	0	1	6	11444	7	7	0	0.000611674	11444	11444	7	7	0	0.000611674	11444
chr20	32341041	chr20	33753235	rs45577437			C	T	0.163197	0.279511	255886	0.0166667	0.00591664	120	11324	2	67	0	0	0	0	2	67	11444	69	69	0	0.00602936	11444	11444	69	69	0	0.00602936	11444
chr20	32345071	chr20	33757265	rs149362037			G	T	0.109347	0.217292	26168.2	0.00833333	0.000881523	120	11344	1	10	0	0	0	0	1	10	11464	11	11	0	0.000959525	11464	11464	11	11	0	0.000959525	11464
chr20	33004906	chr20	34417100	rs140460146			CT	C	0.277668	0.39309	298.56	0.00877193	0.00154799	114	646	1	1	0	0	0	0	1	1	760	2	2	0	0.00263158	760	760	2	2	0	0.00263158	760
chr20	33004906	chr20	34417100	rs140460146			C	CT	0.15	0.265681	298.56	0.00877193	0	114	646	1	0	0	0	0	0	1	0	760	1	1	0	0.00131579	760	760	1	1	0	0.00131579	760
chr20	33004961	chr20	34417155				A	G	0.00937298	0.0663129	111.64	0.00862069	0	116	12260	1	0	0	0	0	0	1	0	12376	1	1	0	8.08E-05	12376	12376	1	1	0	8.08E-05	12376
chr20	33004964	chr20	34417158				G	A	0.018307	0.0882064	87.95	0.00892857	8.29E-05	112	12068	1	1	0	0	0	0	1	1	12180	2	2	0	0.000164204	12180	12180	2	2	0	0.000164204	12180
chr20	33065610	chr20	34477805				C	T	0.0539263	0.144993	9938.89	0.00833333	0.000397456	120	15096	1	6	0	0	0	0	1	6	15216	7	7	0	0.000460042	15216	15216	7	7	0	0.000460042	15216
chr20	35555586	chr20	36927183				G	A	0.0236195	0.0899107	3531.6	0.00833333	0.000133316	120	15002	1	2	0	0	0	0	1	2	15122	3	3	0	0.000198386	15122	15122	3	3	0	0.000198386	15122
chr20	62326906	chr20	63695553				G	A	0.0104566	0.0663129	725.59	0.00833333	0	120	11356	1	0	0	0	0	0	1	0	11476	1	1	0	8.71E-05	11476	11476	1	1	0	8.71E-05	11476
chr21	42879910	chr21	41507983	rs200291871			C	G	0.212517	0.329784	190543	0.0166667	0.00706522	120	11040	2	78	0	0	0	0	2	78	11160	80	80	0	0.00716846	11160	11160	80	80	0	0.00716846	11160
chr21	46320279	chr21	44900364	rs137959302			G	A	0.299933	0.412182	115925	0.00833333	0.00291275	120	15106	1	44	0	0	0	2	1	42	15226	43	43	2	0.00295547	15226	15226	43	43	2	0.00295547	15226
chr21	46326831	chr21	44906916	rs199932521			T	C	0.046379	0.133784	7085.61	0.00833333	0.000331038	120	15104	1	5	0	0	0	0	1	5	15224	6	6	0	0.000394115	15224	15224	6	6	0	0.000394115	15224
chr22	17577965	chr22	17097075	rs143008696			C	T	0.118998	0.227833	30631.2	0.00833333	0.000993246	120	15102	1	15	0	0	0	0	1	15	15222	16	16	0	0.00105111	15222	15222	16	16	0	0.00105111	15222
chr22	17584433	chr22	17103543				G	A	0.0311492	0.10344	8491.01	0.00833333	0.000198544	120	15110	1	3	0	0	0	0	1	3	15230	4	4	0	0.00026264	15230	15230	4	4	0	0.00026264	15230
chr22	17586757	chr22	17105867	rs140221307			T	C	0.186125	0.304654	65393.1	0.00833333	0.00165541	120	15102	1	25	0	0	0	0	1	25	15222	26	26	0	0.00170805	15222	15222	26	26	0	0.00170805	15222
chr22	18643020	chr22	18160253	rs200425361			C	T	0.0709696	0.170216	16994.8	0.00833333	0.000528448	120	11354	1	6	0	0	0	0	1	6	11474	7	7	0	0.000610075	11474	11474	7	7	0	0.000610075	11474
chr22	18653662	chr22	18170895				G	A	0.108387	0.217292	4845.11	0.00961538	0.00101551	104	10832	1	11	0	0	0	0	1	11	10936	12	12	0	0.00109729	10936	10936	12	12	0	0.00109729	10936
chr22	18655932	chr22	18173165	rs200388263			G	A	0.0313266	0.10344	4571.36	0.00833333	0.000177746	120	11252	1	2	0	0	0	0	1	2	11372	3	3	0	0.000263806	11372	11372	3	3	0	0.000263806	11372
chr22	23915574	chr22	23573387	rs1064419			G	A	0.567785	0.668725	90430.6	0.00847458	0.00704506	118	15046	1	106	0	0	0	0	1	106	15164	107	107	0	0.00705619	15164	15164	107	107	0	0.00705619	15164
chr22	23917217	chr22	23575030				AC	A	0.208415	0.32562	81664.6	0.00847458	0.00192028	118	15102	1	29	0	0	0	0	1	29	15220	30	30	0	0.00197109	15220	15220	30	30	0	0.00197109	15220
chr22	26849367	chr22	26453401	rs202120615			A	G	0.0235947	0.0899107	7509.65	0.00833333	0.000133174	120	15018	1	2	0	0	0	0	1	2	15138	3	3	0	0.000198177	15138	15138	3	3	0	0.000198177	15138
chr22	26860200	chr22	26464234	rs147435410			G	A	0.3054	0.416674	155323	0.00833333	0.00297816	120	15110	1	45	0	0	0	0	1	45	15230	46	46	0	0.00302035	15230	15230	46	46	0	0.00302035	15230
chr22	26861473	chr22	26465507	rs34962745			T	A	1	1	282753	0.00833333	0.010327	120	15106	1	156	0	0	0	2	1	154	15226	155	155	2	0.0103113	15226	15226	155	155	2	0.0103113	15226
chr22	35782700	chr22	35386707				A	T	0.00788022	0.0663129	585.59	0.00833333	0	120	15108	1	0	0	0	0	0	1	0	15228	1	1	0	6.57E-05	15228	15228	1	1	0	6.57E-05	15228
chr22	36661945	chr22	36265899	rs151114491			G	A	0.0978958	0.205477	22277.9	0.00833333	0.000795334	120	15088	1	12	0	0	0	0	1	12	15208	13	13	0	0.000854813	15208	15208	13	13	0	0.000854813	15208
chr22	37333627	chr22	36937585				T	G	0.00257666	0.0663129	516.16	0.0208333	0.000672405	96	14872	2	10	0	0	0	0	2	10	14968	12	12	0	0.00080171	14968	14968	12	12	0	0.00080171	14968
chr22	37524662	chr22	37128622	rs149497090			G	C	0.278404	0.39309	75670.1	0.00833333	0.00264178	120	11356	1	30	0	0	0	0	1	30	11476	31	31	0	0.00270129	11476	11476	31	31	0	0.00270129	11476
chr22	37524843	chr22	37128803	rs143857582			C	T	0.198452	0.317476	47085.8	0.00833333	0.00176336	120	11342	1	20	0	0	0	0	1	20	11462	21	21	0	0.00183214	11462	11462	21	21	0	0.00183214	11462
chr22	37622790	chr22	37226750				C	T	0.0234564	0.0899107	3256.78	0.00833333	0.00013238	120	15108	1	2	0	0	0	0	1	2	15228	3	3	0	0.000197006	15228	15228	3	3	0	0.000197006	15228
chr22	42322716	chr22	41926712	rs77874543			G	C	0.524927	0.631195	3730000	0.0666667	0.0827084	120	14134	8	1169	0	0	0	80	8	1089	14254	1097	1097	80	0.0825733	14254	14254	1097	1097	80	0.0825733	14254
chr22	44324767	chr22	43928887	rs141106484			G	A	0.357717	0.472159	312284	0.0166667	0.0104029	120	15092	2	157	0	0	0	2	2	155	15212	157	157	2	0.0104523	15212	15212	157	157	2	0.0104523	15212
chr3	9959312	chr3	9917628				A	C	0.0512185	0.143362	12249.9	0.00833333	0.000352299	120	11354	1	4	0	0	0	0	1	4	11474	5	5	0	0.000435768	11474	11474	5	5	0	0.000435768	11474
chr3	10070369	chr3	10028685	rs150075366			T	C	0.26601	0.382439	78721.8	0.00833333	0.00251789	120	15092	1	38	0	0	0	0	1	38	15212	39	39	0	0.00256377	15212	15212	39	39	0	0.00256377	15212
chr3	25639964	chr3	25598473	rs62638670			G	A	0.140305	0.254396	102013	0.0185185	0.00596853	108	11058	2	66	0	0	0	0	2	66	11166	68	68	0	0.00608992	11166	11166	68	68	0	0.00608992	11166
chr3	30691871	chr3	30650379	rs79375991			G	GA			9669.27	.	0.00211864	0	12272	0	26	0	0	0	0	0	26	12272	26	26	0	0.00211864	12272	12272	26	26	0	0.00211864
chr3	30691871	chr3	30650379	rs79375991			GA	G			9669.27	.	0.0128748	0	12272	0	158	0	0	0	0	0	158	12272	158	158	0	0.0128748	12272	12272	158	158	0	0.0128748
chr3	30691872	chr3	30650380				A	G	0.0358967	0.115574	4336.12	0.00847458	0.00023339	118	12854	1	3	0	0	0	0	1	3	12972	4	4	0	0.000308356	12972	12972	4	4	0	0.000308356	12972
chr3	30691872	chr3	30650380				A	*	0.40811	0.518336	4336.12	0	0.0123697	118	12854	0	159	0	0	0	0	0	159	12972	159	159	0	0.0122572	12972	12972	159	159	0	0.0122572	12972
chr3	30713794	chr3	30672302	rs35719192			G	A	0.0493845	0.141186	100944	0.0166667	0.00286094	120	15030	2	43	0	0	0	0	2	43	15150	45	45	0	0.0029703	15150	15150	45	45	0	0.0029703	15150
chr3	45814076	chr3	45772584				C	G	0.0078854	0.0663129	540.59	0.00833333	0	120	15098	1	0	0	0	0	0	1	0	15218	1	1	0	6.57E-05	15218	15218	1	1	0	6.57E-05	15218
chr3	45942554	chr3	45901062	rs45530037			A	G	0.255226	0.37575	68053.6	0.00833333	0.0023776	120	11356	1	27	0	0	0	0	1	27	11476	28	28	0	0.00243987	11476	11476	28	28	0	0.00243987	11476
chr3	45943081	chr3	45901589				G	C	0.0103039	0.0663129	740.81	0.00847458	0	118	11334	1	0	0	0	0	0	1	0	11452	1	1	0	8.73E-05	11452	11452	1	1	0	8.73E-05	11452
chr3	46411935	chr3	46370444	rs1799987			A	G	0.564547	0.66605	176290	0.408333	0.436464	120	724	49	316	0	0	16	148	33	168	844	201	201	164	0.432464	844	844	201	201	164	0.432464	844
chr3	46414696	chr3	46373205	rs1800560			T	A	0.0388503	0.120472	11519.7	0.00833333	0.000265182	120	15084	1	4	0	0	0	0	1	4	15204	5	5	0	0.000328861	15204	15204	5	5	0	0.000328861	15204
chr3	48510754	chr3	48469355				A	G	0.0613435	0.152249	19314.1	0.00833333	0.000441852	120	11316	1	5	0	0	0	0	1	5	11436	6	6	0	0.000524659	11436	11436	6	6	0	0.000524659	11436
chr3	49569389	chr3	49531956				C	T	0.00787919	0.0663129	540.59	0.00833333	0	120	15110	1	0	0	0	0	0	1	0	15230	1	1	0	6.57E-05	15230	15230	1	1	0	6.57E-05	15230
chr3	146251312	chr3	146533525	rs372003252			C	T	0.0104694	0.0663129	531.59	0.00833333	0	120	11342	1	0	0	0	0	0	1	0	11462	1	1	0	8.72E-05	11462	11462	1	1	0	8.72E-05	11462
chr3	148458960	chr3	148741173				C	G	0.0154463	0.0788654	1148.69	0.00847458	6.62E-05	118	15102	1	1	0	0	0	0	1	1	15220	2	2	0	0.000131406	15220	15220	2	2	0	0.000131406	15220
chr3	196214299	chr3	196487428	rs112513009			C	T	0.0463611	0.133784	10873.2	0.00833333	0.000330907	120	15110	1	5	0	0	0	0	1	5	15230	6	6	0	0.000393959	15230	15230	6	6	0	0.000393959	15230
chr4	10079377	chr4	10077753	rs34193855			C	T	0.0015917	0.0663129	302825	0.0416667	0.00671972	120	11310	5	76	0	0	0	0	5	76	11430	81	81	0	0.00708661	11430	11430	81	81	0	0.00708661	11430
chr4	10105532	chr4	10103908				T	A	0.0301356	0.10344	5247.45	0.00862069	0.000176741	116	11316	1	2	0	0	0	0	1	2	11432	3	3	0	0.000262421	11432	11432	3	3	0	0.000262421	11432
chr4	74607285	chr4	73741568	rs188378669			G	T	0.54918	0.653515	168044	0.00833333	0.0065772	120	15052	1	99	0	0	0	0	1	99	15172	100	100	0	0.00659109	15172	15172	100	100	0	0.00659109	15172
chr4	110681781	chr4	109760625	rs190001845			C	T	0.0312141	0.10344	4340.47	0.00833333	0.000198965	120	15078	1	3	0	0	0	0	1	3	15198	4	4	0	0.000263193	15198	15198	4	4	0	0.000263193	15198
chr4	126241288	chr4	125320133	rs200169047			A	G	0.0104584	0.0663129	75.59	0.00833333	0	120	11354	1	0	0	0	0	0	1	0	11474	1	1	0	8.72E-05	11474	11474	1	1	0	8.72E-05	11474
chr4	126336650	chr4	125415495	rs373678302			G	A	0.0104657	0.0663129	954.59	0.00833333	0	120	11346	1	0	0	0	0	0	1	0	11466	1	1	0	8.72E-05	11466	11466	1	1	0	8.72E-05	11466
chr4	126336792	chr4	125415637	rs188934368			A	C	0.00784942	0.0663129	33610	0.0166667	0.000968992	120	11352	2	11	0	0	0	0	2	11	11472	13	13	0	0.00113319	11472	11472	13	13	0	0.00113319	11472
chr4	126355484	chr4	125434329	rs116568645			C	A	0.0998842	0.20677	21211.2	0.00833333	0.000793091	120	11348	1	9	0	0	0	0	1	9	11468	10	10	0	0.000871992	11468	11468	10	10	0	0.000871992	11468
chr4	126371616	chr4	125450461	rs200702071			G	A	0.0807189	0.184768	19205.2	0.00833333	0.00061674	120	11350	1	7	0	0	0	0	1	7	11470	8	8	0	0.000697472	11470	11470	8	8	0	0.000697472	11470
chr4	126372555	chr4	125451400	rs147872710			A	G	0.286055	0.398971	74879.5	0.00833333	0.0027308	120	11352	1	31	0	0	0	0	1	31	11472	32	32	0	0.0027894	11472	11472	32	32	0	0.0027894	11472
chr4	126389831	chr4	125468676	rs138019311			C	T	0.511859	0.620899	198270	0.00833333	0.00590204	120	11352	1	67	0	0	0	0	1	67	11472	68	68	0	0.00592748	11472	11472	68	68	0	0.00592748	11472
chr4	151770608	chr4	150849456				A	C	0.52375	0.630881	265781	0.00862069	0.0221239	116	11300	1	250	0	0	0	0	1	250	11416	251	251	0	0.0219867	11416	11416	251	251	0	0.0219867	11416
chr4	185556509	chr4	184635355				C	A	0.0688673	0.16649	7758.33	0.00833333	0.000530504	120	15080	1	8	0	0	0	0	1	8	15200	9	9	0	0.000592105	15200	15200	9	9	0	0.000592105	15200
chr4	187004555	chr4	186083401				A	G	0.00788747	0.0663129	361.69	0.00833333	0	120	15094	1	0	0	0	0	0	1	0	15214	1	1	0	6.57E-05	15214	15214	1	1	0	6.57E-05	15214
chr5	1264586	chr5	1264471				C	T	0.0616511	0.152249	18328.1	0.00833333	0.000465735	120	15030	1	7	0	0	0	0	1	7	15150	8	8	0	0.000528053	15150	15150	8	8	0	0.000528053	15150
chr5	34937654	chr5	34937549	rs140595082			G	A	0.00369171	0.0663129	67367.2	0.025	0.00237927	120	11348	3	27	0	0	0	0	3	27	11468	30	30	0	0.00261597	11468	11468	30	30	0	0.00261597	11468
chr5	39342214	chr5	39342112	rs34000044			G	A	1	1	158692	0	6.62E-05	120	15104	0	1	0	0	0	0	0	1	15224	1	1	0	6.57E-05	15224	15224	1	1	0	6.57E-05	15224
chr5	40931237	chr5	40931135	rs78327832			C	T	0.266431	0.382439	65901.2	0.00833333	0.00252257	120	15064	1	38	0	0	0	0	1	38	15184	39	39	0	0.00256849	15184	15184	39	39	0	0.00256849	15184
chr5	40934463	chr5	40934361	rs369091418			G	A	0.0234931	0.0899107	10834.1	0.00833333	0.000132591	120	15084	1	2	0	0	0	0	1	2	15204	3	3	0	0.000197316	15204	15204	3	3	0	0.000197316	15204
chr5	40950020	chr5	40949918	rs368388575			G	A	0.0466011	0.133784	5038.17	0.00833333	0.000332668	120	15030	1	5	0	0	0	0	1	5	15150	6	6	0	0.00039604	15150	15150	6	6	0	0.00039604	15150
chr5	41201730	chr5	41201628				C	T	0.00789266	0.0663129	474.59	0.00833333	0	120	15084	1	0	0	0	0	0	1	0	15204	1	1	0	6.58E-05	15204	15204	1	1	0	6.58E-05	15204
chr5	55237264	chr5	55941436				A	C	0.0411873	0.123978	8754.6	0.00833333	0.000264224	120	11354	1	3	0	0	0	0	1	3	11474	4	4	0	0.000348614	11474	11474	4	4	0	0.000348614	11474
chr5	65350250	chr5	66054422	rs137933401			A	G	0.198265	0.317476	38846.1	0.00833333	0.00176149	120	11354	1	20	0	0	0	0	1	20	11474	21	21	0	0.00183022	11474	11474	21	21	0	0.00183022	11474
chr5	77409637	chr5	78113813	rs141102178			G	A	0.17546	0.29201	160284	0.0166667	0.00623177	120	15084	2	94	0	0	0	2	2	92	15204	94	94	2	0.00631413	15204	15204	94	94	2	0.00631413	15204
chr5	94872524	chr5	95536820				A	C	0.053961	0.144993	6185.93	0.00833333	0.00039772	120	15086	1	6	0	0	0	0	1	6	15206	7	7	0	0.000460345	15206	15206	7	7	0	0.000460345	15206
chr5	94878956	chr5	95543252				G	A	0.0157071	0.0788654	3024.68	0.00833333	6.62E-05	120	15100	1	1	0	0	0	0	1	1	15220	2	2	0	0.000131406	15220	15220	2	2	0	0.000131406	15220
chr5	156479492	chr5	157052481	rs200904360			A	G	0.44965	0.561247	347372	0.00833333	0.00491715	120	14846	1	73	0	0	0	0	1	73	14966	74	74	0	0.00494454	14966	14966	74	74	0	0.00494454	14966
chr5	156482532	chr5	157055521				C	A	0.102228	0.210884	17468.5	0.00862069	0.000866205	116	15008	1	13	0	0	0	0	1	13	15124	14	14	0	0.000925681	15124	15124	14	14	0	0.000925681	15124
chr5	156485931	chr5	157058920	rs62621083			C	T	0.702068	0.802197	6390.86	0.0166667	0.0149457	120	736	2	11	0	0	0	0	2	11	856	13	13	0	0.0151869	856	856	13	13	0	0.0151869	856
chr5	169144416	chr5	169717412				G	A	0.0104712	0.0663129	252.59	0.00833333	0	120	11340	1	0	0	0	0	0	1	0	11460	1	1	0	8.73E-05	11460	11460	1	1	0	8.73E-05	11460
chr5	169188620	chr5	169761616				A	G	0.164299	0.279511	18704.8	0.00833333	0.00141418	120	11314	1	16	0	0	0	0	1	16	11434	17	17	0	0.00148679	11434	11434	17	17	0	0.00148679	11434
chr5	169506149	chr5	170079145	rs199698060			G	A	0.155498	0.271356	20795.1	0.00833333	0.00132649	120	11308	1	15	0	0	0	0	1	15	11428	16	16	0	0.00140007	11428	11428	16	16	0	0.00140007	11428
chr5	176829600	chr5	177402599				G	A	0.0234625	0.0899107	6418.8	0.00833333	0.000132415	120	15104	1	2	0	0	0	0	1	2	15224	3	3	0	0.000197057	15224	15224	3	3	0	0.000197057	15224
chr5	176836045	chr5	177409044				A	C	0.19914	0.317476	8927.53	0.00833333	0.00178998	120	15084	1	27	0	0	0	0	1	27	15204	28	28	0	0.00184162	15204	15204	28	28	0	0.00184162	15204
chr5	177577897	chr5	178150896				A	T	0.015705	0.0788654	3286.78	0.00833333	6.62E-05	120	15102	1	1	0	0	0	0	1	1	15222	2	2	0	0.000131389	15222	15222	2	2	0	0.000131389	15222
chr6	3083380	chr6	3083146				A	C	0.0612183	0.152249	10897.4	0.00833333	0.000440917	120	11340	1	5	0	0	0	0	1	5	11460	6	6	0	0.00052356	11460	11460	6	6	0	0.00052356	11460
chr6	31110881	chr6	31143104	rs150016491			G	A	0.00776725	0.0663129	282.61	0.00847458	0	118	15074	1	0	0	0	0	0	1	0	15192	1	1	0	6.58E-05	15192	15192	1	1	0	6.58E-05	15192
chr6	31112523	chr6	31144746				T	G	0.0157112	0.0788654	1215.7	0.00833333	6.62E-05	120	15096	1	1	0	0	0	0	1	1	15216	2	2	0	0.000131441	15216	15216	2	2	0	0.000131441	15216
chr6	31113503	chr6	31145726				A	C	0.0234717	0.0899107	3638.8	0.00833333	0.000132468	120	15098	1	2	0	0	0	0	1	2	15218	3	3	0	0.000197135	15218	15218	3	3	0	0.000197135	15218
chr6	31322910	chr6	31355133	rs74189305			G	A			1664.05	.	0.000241352	0	12430	0	3	0	0	0	0	0	3	12430	3	3	0	0.000241352	12430	12430	3	3	0	0.000241352
chr6	31322910	chr6	31355133	rs74189305			G	GCAGCGACCA			1664.05	.	0.000241352	0	12430	0	3	0	0	0	0	0	3	12430	3	3	0	0.000241352	12430	12430	3	3	0	0.000241352
chr6	31322925	chr6	31355148	rs41548516			C	A	1	1	1174.82	0	0.000224753	76	13348	0	3	0	0	0	0	0	3	13424	3	3	0	0.00022348	13424	13424	3	3	0	0.00022348	13424
chr6	31322928	chr6	31355151				A	G	1	1	1319.24	0	0.00038046	70	13142	0	5	0	0	0	0	0	5	13212	5	5	0	0.000378444	13212	13212	5	5	0	0.000378444	13212
chr6	31322936	chr6	31355159				AACT	A	1	1	1185.09	0	0.00023116	56	12978	0	3	0	0	0	0	0	3	13034	3	3	0	0.000230167	13034	13034	3	3	0	0.000230167	13034
chr6	31322936	chr6	31355159				AACTGCT	A	1	1	1185.09	0	0.000154107	56	12978	0	2	0	0	0	0	0	2	13034	2	2	0	0.000153445	13034	13034	2	2	0	0.000153445	13034
chr6	31323094	chr6	31355317	rs2308500			C	T	0.0220949	0.0899107	265.35	0.00909091	0.000135906	110	14716	1	2	0	0	0	0	1	2	14826	3	3	0	0.000202347	14826	14826	3	3	0	0.000202347	14826
chr6	31323108	chr6	31355331	rs41560417			A	C	0.0220212	0.0899107	275.23	0.00909091	0.000135446	110	14766	1	2	0	0	0	0	1	2	14876	3	3	0	0.000201667	14876	14876	3	3	0	0.000201667	14876
chr6	31323109	chr6	31355332	rs41555419			G	A	0.0223768	0.0899107	275.17	0.00892857	0.000135208	112	14792	1	2	0	0	0	0	1	2	14904	3	3	0	0.000201288	14904	14904	3	3	0	0.000201288	14904
chr6	31323117	chr6	31355340	rs1611623			G	T	0.0223887	0.0899107	278.19	0.00892857	0.000135281	112	14784	1	2	0	0	0	0	1	2	14896	3	3	0	0.000201396	14896	14896	3	3	0	0.000201396	14896
chr6	31323160	chr6	31355383	rs41542113			C	G	0.0151126	0.0788654	53.46	0.00877193	6.70E-05	114	14916	1	1	0	0	0	0	1	1	15030	2	2	0	0.000133067	15030	15030	2	2	0	0.000133067	15030
chr6	31323366	chr6	31355589	rs199875334			G	T	1	1	968.56	0	0.00213736	86	14036	0	30	0	0	0	0	0	30	14122	30	30	0	0.00212434	14122	14122	30	30	0	0.00212434	14122
chr6	31323368	chr6	31355591				G	T	1	1	981.34	0	0.00207084	84	14004	0	29	0	0	0	0	0	29	14088	29	29	0	0.00205849	14088	14088	29	29	0	0.00205849	14088
chr6	31324184	chr6	31356407	rs1131112			C	T	1	1	4820000	0	0.000864719	44	10408	0	9	0	0	0	0	0	9	10452	9	9	0	0.000861079	10452	10452	9	9	0	0.000861079	10452
chr6	31324195	chr6	31356418	rs151341218			T	C	0.109907	0.217603	1040000	0	0.0683702	38	10136	0	693	0	0	0	188	0	505	10174	505	505	188	0.0681148	10174	10174	505	505	188	0.0681148	10174
chr6	31324195	chr6	31356418	rs151341218			T	G	1	1	1040000	0	0.00315706	38	10136	0	32	0	0	0	0	0	32	10174	32	32	0	0.00314527	10174	10174	32	32	0	0.00314527	10174
chr6	31324195	chr6	31356418	rs151341218			T	A	0.402927	0.51366	1040000	0	0.0376875	38	10136	0	382	0	0	0	16	0	366	10174	366	366	16	0.0375467	10174	10174	366	366	16	0.0375467	10174
chr6	31324467	chr6	31356690	rs41559314			G	T	0.237555	0.357371	11710.3	0.0135135	0.00359389	74	13356	1	48	0	0	0	4	1	44	13430	45	45	4	0.00364855	13430	13430	45	45	4	0.00364855	13430
chr6	31324467	chr6	31356690	rs41559314			G	A	1	1	11710.3	0	0.000224618	74	13356	0	3	0	0	0	0	0	3	13430	3	3	0	0.00022338	13430	13430	3	3	0	0.00022338	13430
chr6	31543664	chr6	31575887				G	T	0.0235669	0.0899107	9918.03	0.00833333	0.000133014	120	15036	1	2	0	0	0	0	1	2	15156	3	3	0	0.000197941	15156	15156	3	3	0	0.000197941	15156
chr6	31868915	chr6	31901138				G	T	0.0234656	0.0899107	8184.4	0.00833333	0.000132433	120	15102	1	2	0	0	0	0	1	2	15222	3	3	0	0.000197083	15222	15222	3	3	0	0.000197083	15222
chr6	31895723	chr6	31927946				C	A	0.03879	0.120472	7630.21	0.00833333	0.00026476	120	15108	1	4	0	0	0	0	1	4	15228	5	5	0	0.000328343	15228	15228	5	5	0	0.000328343	15228
chr6	31902056	chr6	31934279				G	A	0.0157112	0.0788654	1169.69	0.00833333	6.62E-05	120	15096	1	1	0	0	0	0	1	1	15216	2	2	0	0.000131441	15216	15216	2	2	0	0.000131441	15216
chr6	31916217	chr6	31948440				G	A	0.03879	0.120472	3016.03	0.00833333	0.00026476	120	15108	1	4	0	0	0	0	1	4	15228	5	5	0	0.000328343	15228	15228	5	5	0	0.000328343	15228
chr6	31917053	chr6	31949276				T	C	0.00788229	0.0663129	713.63	0.00833333	0	120	15104	1	0	0	0	0	0	1	0	15224	1	1	0	6.57E-05	15224	15224	1	1	0	6.57E-05	15224
chr6	31930262	chr6	31962485				C	T	0.104941	0.213474	54786.9	0.00833333	0.000860927	120	15100	1	13	0	0	0	0	1	13	15220	14	14	0	0.000919842	15220	15220	14	14	0	0.000919842	15220
chr6	31934882	chr6	31967105	rs148221996			G	C	0.398337	0.511088	173429	0.00833333	0.0041755	120	15088	1	63	0	0	0	0	1	63	15208	64	64	0	0.00420831	15208	15208	64	64	0	0.00420831	15208
chr6	31938120	chr6	31970343	rs45531831			C	T	0.321142	0.43048	737077	0.0333333	0.0208057	120	15092	4	314	0	0	0	4	4	310	15212	314	314	4	0.0209045	15212	15212	314	314	4	0.0209045	15212
chr6	31946792	chr6	31979015	rs2746394			G	A	0.365381	0.479518	73753.9	0.00833333	0.00373085	120	15010	1	56	0	0	0	0	1	56	15130	57	57	0	0.00376735	15130	15130	57	57	0	0.00376735	15130
chr6	31994838	chr6	32027061	rs369244343			G	A	0.133657	0.24623	21245.4	0.00925926	0.00125889	108	13504	1	17	0	0	0	6	1	11	13612	12	12	6	0.00132236	13612	13612	12	12	6	0.00132236	13612
chr6	31997358	chr6	32029581				G	GCT	0.377136	0.487082	147053	0.0166667	0.0108565	120	15014	2	163	0	0	0	0	2	163	15134	165	165	0	0.0109026	15134	15134	165	165	0	0.0109026	15134
chr6	32006858	chr6	32039081	rs6467			C	G	1	1	2.80E+07	0	0.00275983	120	14856	0	41	0	0	0	4	0	37	14976	37	37	4	0.00273771	14976	14976	37	37	4	0.00273771	14976
chr6	32548032	chr6	32580255	rs17887154			T	G	0.421359	0.527847	23106.9	0.00943396	0.00509782	106	14516	1	74	0	0	0	4	1	70	14622	71	71	4	0.00512926	14622	14622	71	71	4	0.00512926	14622
chr6	32548522	chr6	32580745	rs35121789			C	G	0.117706	0.22717	99661.6	0	0.0238451	112	14720	0	351	0	0	0	0	0	351	14832	351	351	0	0.023665	14832	14832	351	351	0	0.023665	14832
chr6	32549452	chr6	32581675	rs77637983			C	A	0.781207	0.880936	945833	0.0465116	0.0410283	86	13576	4	557	0	0	2	44	2	513	13662	515	515	46	0.0410628	13662	13662	515	515	46	0.0410628	13662
chr6	32549452	chr6	32581675	rs77637983			C	G	0.401015	0.512614	945833	0.0465116	0.0696081	86	13576	4	945	0	0	0	2	4	943	13662	947	947	2	0.0694627	13662	13662	947	947	2	0.0694627	13662
chr6	32549496	chr6	32581719				C	T	0.0783285	0.181102	6402.36	0.0185185	0.00418467	108	14816	2	62	0	0	0	0	2	62	14924	64	64	0	0.00428839	14924	14924	64	64	0	0.00428839	14924
chr6	32551953	chr6	32584176	rs9281873			CCG	*	1	1	1.20E+07	0	0.00748481	90	13494	0	101	0	0	0	6	0	95	13584	95	95	6	0.00743522	13584	13584	95	95	6	0.00743522	13584
chr6	32551953	chr6	32584176	rs9281873			CCG	C	0.103734	0.212872	1.20E+07	0.3	0.383652	90	13494	27	5177	0	0	10	2532	17	2645	13584	2662	2662	2542	0.383098	13584	13584	2662	2662	2542	0.383098	13584
chr6	32551954	chr6	32584177	rs67798196			CG	*	0.872107	0.977043	16378.8	0.235294	0.227969	102	522	24	119	0	0	10	40	14	79	624	93	93	50	0.229167	624	624	93	93	50	0.229167	624
chr6	32551954	chr6	32584177	rs67798196			CG	C	0.856484	0.961103	16378.8	0.127451	0.1341	102	522	13	70	0	0	2	8	11	62	624	73	73	10	0.133013	624	624	73	73	10	0.133013	624
chr6	32551954	chr6	32584177	rs17885869;rs67798196			CG	*			2720000	.	0.341411	0	13040	0	4452	0	0	0	2492	0	1960	13040	1960	1960	2492	0.341411	13040	13040	1960	1960	2492	0.341411
chr6	32551954	chr6	32584177	rs17885869;rs67798196			CG	C			2720000	.	0.124847	0	13040	0	1628	0	0	0	494	0	1134	13040	1134	1134	494	0.124847	13040	13040	1134	1134	494	0.124847
chr6	32551954	chr6	32584177	rs17885869;rs67798196			C	A			2720000	.	0.000153374	0	13040	0	2	0	0	0	0	0	2	13040	2	2	0	0.000153374	13040	13040	2	2	0	0.000153374
chr6	32551955	chr6	32584178				G	*	0.833144	0.936438	35834.7	0.254902	0.264925	102	536	26	142	0	0	12	48	14	94	638	108	108	60	0.263323	638	638	108	108	60	0.263323	638
chr6	32551955	chr6	32584178				G	GCT	0.375536	0.486361	35834.7	0.196078	0.160448	102	536	20	86	0	0	6	18	14	68	638	82	82	24	0.166144	638	638	82	82	24	0.166144	638
chr6	32551955	chr6	32584178	rs17885222			G	*			6320000	.	0.400454	0	13210	0	5290	0	0	0	2986	0	2304	13210	2304	2304	2986	0.400454	13210	13210	2304	2304	2986	0.400454
chr6	32551955	chr6	32584178	rs17885222			G	GCT			6320000	.	0.128842	0	13210	0	1702	0	0	0	590	0	1112	13210	1112	1112	590	0.128842	13210	13210	1112	1112	590	0.128842
chr6	32551955	chr6	32584178	rs17885222			G	A			6320000	.	0.000984103	0	13210	0	13	0	0	0	4	0	9	13210	9	9	4	0.000984103	13210	13210	9	9	4	0.000984103
chr6	32551955	chr6	32584178	rs17885222			G	T			6320000	.	7.57E-05	0	13210	0	1	0	0	0	0	0	1	13210	1	1	0	7.57E-05	13210	13210	1	1	0	7.57E-05
chr6	32551956	chr6	32584179				C	CTT	1	1	66382.8	0	0.00722121	72	10940	0	79	0	0	0	24	0	55	11012	55	55	24	0.00717399	11012	11012	55	55	24	0.00717399	11012
chr6	32551956	chr6	32584179				C	CAT	1	1	66382.8	0	0.000182815	72	10940	0	2	0	0	0	2	0	0	11012	0	0	2	0.00018162	11012	11012	0	0	2	0.00018162	11012
chr6	32552078	chr6	32584301	rs17882300			A	T	0.27037	0.386484	6310000	0.25	0.206101	104	14556	26	3000	0	0	4	426	22	2574	14660	2596	2596	430	0.206412	14660	14660	2596	2596	430	0.206412	14660
chr6	32552156	chr6	32584379				C	T	0.399426	0.511533	43292.2	0.015625	0.00788039	64	13578	1	107	0	0	0	0	1	107	13642	108	108	0	0.00791673	13642	13642	108	108	0	0.00791673	13642
chr6	32552156	chr6	32584379				C	G	1	1	43292.2	0	7.36E-05	64	13578	0	1	0	0	0	0	0	1	13642	1	1	0	7.33E-05	13642	13642	1	1	0	7.33E-05	13642
chr6	32557418	chr6	32589641	rs200079869			A	G	0.00135125	0.0663129	102457	0.121951	0.0387597	82	13158	10	510	0	0	0	6	10	504	13240	514	514	6	0.0392749	13240	13240	514	514	6	0.0392749	13240
chr6	32557418	chr6	32589641	rs200079869			A	T	1	1	102457	0	7.60E-05	82	13158	0	1	0	0	0	0	0	1	13240	1	1	0	7.55E-05	13240	13240	1	1	0	7.55E-05	13240
chr6	32557419	chr6	32589642	rs201278923			C	T	0.173673	0.289736	2410000	0	0.0427721	54	11082	0	474	0	0	0	26	0	448	11136	448	448	26	0.0425647	11136	11136	448	448	26	0.0425647	11136
chr6	32557419	chr6	32589642	rs201278923			C	G	0.663819	0.766116	2410000	0.277778	0.25203	54	11082	15	2793	0	0	0	72	15	2721	11136	2736	2736	72	0.252155	11136	11136	2736	2736	72	0.252155	11136
chr6	32797760	chr6	32829983				T	C	0.0311533	0.10344	26172.6	0.00833333	0.00019857	120	15108	1	3	0	0	0	0	1	3	15228	4	4	0	0.000262674	15228	15228	4	4	0	0.000262674	15228
chr6	32809990	chr6	32842213				T	C	0.0539056	0.144993	16475.9	0.00833333	0.000397298	120	15102	1	6	0	0	0	0	1	6	15222	7	7	0	0.000459861	15222	15222	7	7	0	0.000459861	15222
chr6	32815420	chr6	32847643				A	C	0.058439	0.152249	1277.35	0.00877193	0.000463822	114	15092	1	7	0	0	0	0	1	7	15206	8	8	0	0.000526108	15206	15206	8	8	0	0.000526108	15206
chr6	32815421	chr6	32847644				A	C	0.0441775	0.131199	964.76	0.00877193	0.000331477	114	15084	1	5	0	0	0	0	1	5	15198	6	6	0	0.000394789	15198	15198	6	6	0	0.000394789	15198
chr6	32815422	chr6	32847645				A	C	0.0513037	0.143362	1057.04	0.00877193	0.000397404	114	15098	1	6	0	0	0	0	1	6	15212	7	7	0	0.000460163	15212	15212	7	7	0	0.000460163	15212
chr6	33170169	chr6	33202392				G	A	0.223791	0.342425	83454.1	0.00833333	0.0020318	120	11320	1	23	0	0	0	0	1	23	11440	24	24	0	0.0020979	11440	11440	24	24	0	0.0020979	11440
chr6	35424081	chr6	35456304				A	G	0.00787919	0.0663129	515.59	0.00833333	0	120	15110	1	0	0	0	0	0	1	0	15230	1	1	0	6.57E-05	15230	15230	1	1	0	6.57E-05	15230
chr6	41533595	chr6	41565857	rs41273784			G	A	0.312721	0.424143	336886	0.0166667	0.00934744	120	11340	2	106	0	0	0	2	2	104	11460	106	106	2	0.00942408	11460	11460	106	106	2	0.00942408	11460
chr6	83881694	chr6	83171975	rs141509908			G	C	0.109347	0.217292	18271.3	0.00833333	0.000881523	120	11344	1	10	0	0	0	0	1	10	11464	11	11	0	0.000959525	11464	11464	11	11	0	0.000959525	11464
chr6	90660581	chr6	89950862	rs149898769			C	T	0.491189	0.602187	231679	0.00833333	0.00555654	120	11338	1	63	0	0	0	0	1	63	11458	64	64	0	0.00558562	11458	11458	64	64	0	0.00558562	11458
chr6	108395722	chr6	108074518	rs202093691			T	C	0.47417	0.585489	259134	0.00833333	0.00529731	120	15102	1	80	0	0	0	0	1	80	15222	81	81	0	0.00532125	15222	15222	81	81	0	0.00532125	15222
chr6	137528190	chr6	137207053				A	G	0.133029	0.24623	20129.9	0.00833333	0.00112732	120	15080	1	17	0	0	0	0	1	17	15200	18	18	0	0.00118421	15200	15200	18	18	0	0.00118421	15200
chr7	2946453	chr7	2906819	rs368574818			G	A	0.0411661	0.123978	1904.43	0.00833333	0.000264085	120	11360	1	3	0	0	0	0	1	3	11480	4	4	0	0.000348432	11480	11480	4	4	0	0.000348432	11480
chr7	2969660	chr7	2930026				C	T	0.164009	0.279511	41190	0.00833333	0.00141143	120	11336	1	16	0	0	0	0	1	16	11456	17	17	0	0.00148394	11456	11456	17	17	0	0.00148394	11456
chr7	2976676	chr7	2937042				C	G	0.0104566	0.0663129	292.59	0.00833333	0	120	11356	1	0	0	0	0	0	1	0	11476	1	1	0	8.71E-05	11476	11476	1	1	0	8.71E-05	11476
chr7	6026959	chr7	5987328	rs63750685			G	C	1	1	296309	0.00833333	0.0100596	120	15110	1	152	0	0	0	0	1	152	15230	153	153	0	0.010046	15230	15230	153	153	0	0.010046	15230
chr7	44154494	chr7	44114895				T	C	0.0709696	0.170216	13199.9	0.00833333	0.000528448	120	11354	1	6	0	0	0	0	1	6	11474	7	7	0	0.000610075	11474	11474	7	7	0	0.000610075	11474
chr7	74191612	chr7	74777266	rs273585651			GGT	G	0.00352545	0.0663129	2425.46	0.0175439	0.000664982	114	15038	2	10	0	0	0	0	2	10	15152	12	12	0	0.000791975	15152	15152	12	12	0	0.000791975	15152
chr7	74193665	chr7	74779319	rs144018361			T	G	0.254551	0.37575	78110.5	0.00833333	0.00238854	120	15072	1	36	0	0	0	0	1	36	15192	37	37	0	0.00243549	15192	15192	37	37	0	0.00243549	15192
chr7	82997234	chr7	83367918				G	C	0.00799893	0.0663129	614.59	0.00833333	0	120	14882	1	0	0	0	0	0	1	0	15002	1	1	0	6.67E-05	15002	15002	1	1	0	6.67E-05	15002
chr7	92764570	chr7	93135257				A	C	0.0164702	0.0804822	1082.59	0.00833333	6.95E-05	120	14392	1	1	0	0	0	0	1	1	14512	2	2	0	0.000137817	14512	14512	2	2	0	0.000137817	14512
chr7	106508982	chr7	106868537				G	A	0.0078854	0.0663129	357.59	0.00833333	0	120	15098	1	0	0	0	0	0	1	0	15218	1	1	0	6.57E-05	15218	15218	1	1	0	6.57E-05	15218
chr7	106509436	chr7	106868991				G	A	0.0978345	0.205477	30932	0.00833333	0.000794807	120	15098	1	12	0	0	0	0	1	12	15218	13	13	0	0.000854252	15218	15218	13	13	0	0.000854252	15218
chr7	117188678	chr7	117548624	.			GTGTGTT	G			93.19	.	0.000150015	0	13332	0	2	0	0	0	0	0	2	13332	2	2	0	0.000150015	13332	13332	2	2	0	0.000150015
chr7	117188680	chr7	117548626	.			GTGTT	G			1231.05	.	0.00245286	0	13046	0	32	0	0	0	0	0	32	13046	32	32	0	0.00245286	13046	13046	32	32	0	0.00245286
chr7	117188680	chr7	117548626	.			GTGTT	*			1231.05	.	0.0020696	0	13046	0	27	0	0	0	0	0	27	13046	27	27	0	0.0020696	13046	13046	27	27	0	0.0020696
chr7	117188682	chr7	117548628	rs10229820;rs200454589			GTT	G	0.259049	0.378948	49399.5	0.0526316	0.0308824	114	680	6	21	0	0	0	0	6	21	794	27	27	0	0.034005	794	794	27	27	0	0.034005	794
chr7	117188682	chr7	117548628	rs10229820;rs200454589			G	GTT	0.10381	0.212872	49399.5	0.0526316	0.0220588	114	680	6	15	0	0	0	0	6	15	794	21	21	0	0.0264484	794	794	21	21	0	0.0264484	794
chr7	117188682	chr7	117548628	rs10229820;rs200454589			G	T	0.790354	0.889794	49399.5	0.0877193	0.0955882	114	680	10	65	0	0	2	6	8	59	794	67	67	8	0.0944584	794	794	67	67	8	0.0944584	794
chr7	117188684	chr7	117548630	rs73715573			T	*	0.13047	0.244942	70758.2	0.0535714	0.0270552	112	14378	6	389	0	0	0	2	6	387	14490	393	393	2	0.0272602	14490	14490	393	393	2	0.0272602	14490
chr7	117188684	chr7	117548630	rs73715573			T	TG	1	1	70758.2	0	6.96E-05	112	14378	0	1	0	0	0	0	0	1	14490	1	1	0	6.90E-05	14490	14490	1	1	0	6.90E-05	14490
chr7	117188877	chr7	117548823				G	T	1	1	40.79	0	0.00297619	112	672	0	2	0	0	0	0	0	2	784	2	2	0	0.00255102	784	784	2	2	0	0.00255102	784
chr7	117267592	chr7	117627538	rs1800120			G	A	0.00799254	0.0663129	117334	0.00833333	0	120	14894	1	0	0	0	0	0	1	0	15014	1	1	0	6.66E-05	15014	15014	1	1	0	6.66E-05	15014
chr7	117267812	chr7	117627758	rs34911792			T	G	0.120061	0.228514	90943.9	0.0166667	0.00488164	120	14954	2	73	0	0	0	2	2	71	15074	73	73	2	0.00497545	15074	15074	73	73	2	0.00497545	15074
chr7	117307076	chr7	117667022	rs4148725			C	T	0.015705	0.0788654	1055.68	0.00833333	6.62E-05	120	15102	1	1	0	0	0	0	1	1	15222	2	2	0	0.000131389	15222	15222	2	2	0	0.000131389	15222
chr7	128578301	chr7	128938247				T	G	0.224142	0.342425	244535	0.542373	0.482044	118	724	64	349	0	0	34	170	30	179	842	209	209	204	0.490499	842	842	209	209	204	0.490499	842
chr7	150707332	chr7	151010244	rs200507709			C	T	0.364195	0.478874	138550	0.00833333	0.0037155	120	15072	1	56	0	0	0	0	1	56	15192	57	57	0	0.00375197	15192	15192	57	57	0	0.00375197	15192
chr8	11421468	chr8	11563959				C	G	0.23047	0.348998	96300.1	0.00833333	0.00212314	120	15072	1	32	0	0	0	0	1	32	15192	33	33	0	0.0021722	15192	15192	33	33	0	0.0021722	15192
chr8	42128899	chr8	42271381	rs201028246			G	C	0.13836	0.252865	18514.6	0.00833333	0.00115782	120	11228	1	13	0	0	0	0	1	13	11348	14	14	0	0.0012337	11348	11348	14	14	0	0.0012337	11348
chr8	48771541	chr8	47858980				G	A	0.0311897	0.10344	6086.49	0.00833333	0.000198807	120	15090	1	3	0	0	0	0	1	3	15210	4	4	0	0.000262985	15210	15210	4	4	0	0.000262985	15210
chr8	48792167	chr8	47879606	rs202110076			A	T	0.316404	0.426249	105835	0.00833333	0.00311135	120	15106	1	47	0	0	0	0	1	47	15226	48	48	0	0.0031525	15226	15226	48	48	0	0.0031525	15226
chr8	48888293	chr8	47975733	rs146034877			G	A	0.00783533	0.0663129	2880.91	0.00847458	0	118	14942	1	0	0	0	0	0	1	0	15060	1	1	0	6.64E-05	15060	15060	1	1	0	6.64E-05	15060
chr8	61734634	chr8	60822075				A	G	0.0157153	0.0788654	2754.7	0.00833333	6.63E-05	120	15092	1	1	0	0	0	0	1	1	15212	2	2	0	0.000131475	15212	15212	2	2	0	0.000131475	15212
chr8	61764760	chr8	60852201	rs201423234			G	A	0.0906811	0.196394	12077.4	0.00833333	0.000728766	120	15094	1	11	0	0	0	0	1	11	15214	12	12	0	0.000788747	15214	15214	12	12	0	0.000788747	15214
chr8	90990521	chr8	89978293	rs61754966			T	C	0.403324	0.51366	198326	0.0166667	0.0114782	120	15072	2	173	0	0	0	0	2	173	15192	175	175	0	0.0115192	15192	15192	175	175	0	0.0115192	15192
chr8	90993640	chr8	89981412	rs61753720			C	T	0.205424	0.323183	55798.4	0.00833333	0.00185578	120	15088	1	28	0	0	0	0	1	28	15208	29	29	0	0.00190689	15208	15208	29	29	0	0.00190689	15208
chr8	100108585	chr8	99096357				G	T	0.00788747	0.0663129	539.59	0.00833333	0	120	15094	1	0	0	0	0	0	1	0	15214	1	1	0	6.57E-05	15214	15214	1	1	0	6.57E-05	15214
chr8	100115219	chr8	99102991				G	T	0.0235115	0.0899107	2783.84	0.00833333	0.000132696	120	15072	1	2	0	0	0	0	1	2	15192	3	3	0	0.000197472	15192	15192	3	3	0	0.000197472	15192
chr8	100147861	chr8	99135633	rs150783688			C	T	0.166879	0.281681	32440.8	0.00833333	0.00146005	120	15068	1	22	0	0	0	0	1	22	15188	23	23	0	0.00151435	15188	15188	23	23	0	0.00151435	15188
chr8	100205126	chr8	99192898	rs202052403			A	G	0.199517	0.317476	49774.3	0.00833333	0.00179378	120	15052	1	27	0	0	0	0	1	27	15172	28	28	0	0.0018455	15172	15172	28	28	0	0.0018455	15172
chr8	100205241	chr8	99193013	rs145419141			C	T	0.166558	0.281681	52279.1	0.00833333	0.00145695	120	15100	1	22	0	0	0	0	1	22	15220	23	23	0	0.00151117	15220	15220	23	23	0	0.00151117	15220
chr8	100514006	chr8	99501778	rs200229383			G	A	0.00788333	0.0663129	304.59	0.00833333	0	120	15102	1	0	0	0	0	0	1	0	15222	1	1	0	6.57E-05	15222	15222	1	1	0	6.57E-05	15222
chr8	100830707	chr8	99818479	rs371325199			A	G	0.0078937	0.0663129	461.59	0.00833333	0	120	15082	1	0	0	0	0	0	1	0	15202	1	1	0	6.58E-05	15202	15202	1	1	0	6.58E-05	15202
chr8	100831065	chr8	99818837	rs145890213			C	T	0.00609772	0.0663129	34219.3	0.0166667	0.000864247	120	15042	2	13	0	0	0	0	2	13	15162	15	15	0	0.000989315	15162	15162	15	15	0	0.000989315	15162
chr8	100831710	chr8	99819482	rs200611924			G	A	0.00789681	0.0663129	326.61	0.00833333	0	120	15076	1	0	0	0	0	0	1	0	15196	1	1	0	6.58E-05	15196	15196	1	1	0	6.58E-05	15196
chr8	100832259	chr8	99820031	rs28940272			A	G	0.260543	0.380169	97329.8	0.00833333	0.00245586	120	15066	1	37	0	0	0	0	1	37	15186	38	38	0	0.0025023	15186	15186	38	38	0	0.0025023	15186
chr8	100847535	chr8	99835307				T	A	0.00789266	0.0663129	563.59	0.00833333	0	120	15084	1	0	0	0	0	0	1	0	15204	1	1	0	6.58E-05	15204	15204	1	1	0	6.58E-05	15204
chr8	100874154	chr8	99861926	rs149318176			G	A	0.271845	0.386986	90676.2	0.00833333	0.00258449	120	15090	1	39	0	0	0	0	1	39	15210	40	40	0	0.00262985	15210	15210	40	40	0	0.00262985	15210
chr8	100883714	chr8	99871486				T	C	0.0157628	0.0788654	2438.75	0.00833333	6.65E-05	120	15046	1	1	0	0	0	0	1	1	15166	2	2	0	0.000131874	15166	15166	2	2	0	0.000131874	15166
chr8	145736889	chr8	144511506				C	T	0.0538848	0.144993	23401.7	0.00833333	0.000397141	120	15108	1	6	0	0	0	0	1	6	15228	7	7	0	0.00045968	15228	15228	7	7	0	0.00045968	15228
chr8	145737131	chr8	144511748	rs61755066			C	G	0.0907039	0.196394	46033.8	0.00833333	0.00072896	120	15090	1	11	0	0	0	0	1	11	15210	12	12	0	0.000788955	15210	15210	12	12	0	0.000788955	15210
chr8	145737620	chr8	144512237	rs202203322			T	C	0.60192	0.70292	402357	0.00833333	0.00761085	120	15110	1	115	0	0	0	2	1	113	15230	114	114	2	0.00761655	15230	15230	114	114	2	0.00761655	15230
chr8	145738804	chr8	144513420	rs190061994			C	T	0.12592	0.238348	47608.9	0.00833333	0.00105918	120	15106	1	16	0	0	0	0	1	16	15226	17	17	0	0.00111651	15226	15226	17	17	0	0.00111651	15226
chr8	145739881	chr8	144514497				G	A	0.0530212	0.144993	9680.03	0.00847458	0.000397193	118	15106	1	6	0	0	0	0	1	6	15224	7	7	0	0.0004598	15224	15224	7	7	0	0.0004598	15224
chr9	289557	chr9	289557	rs150742426			G	A	0.529765	0.635903	143322	0.00833333	0.00622681	120	15096	1	94	0	0	0	0	1	94	15216	95	95	0	0.00624343	15216	15216	95	95	0	0.00624343	15216
chr9	332443	chr9	332443	rs146777948			C	T	0.0544576	0.145431	16871.6	0.00833333	0.000401499	120	14944	1	6	0	0	0	0	1	6	15064	7	7	0	0.000464684	15064	15064	7	7	0	0.000464684	15064
chr9	396881	chr9	396881	rs140148619			A	G	0.00775778	0.0663129	42972.8	0.0166667	0.000993246	120	15102	2	15	0	0	0	0	2	15	15222	17	17	0	0.0011168	15222	15222	17	17	0	0.0011168	15222
chr9	441363	chr9	441363				G	C	0.00788229	0.0663129	74.59	0.00833333	0	120	15104	1	0	0	0	0	0	1	0	15224	1	1	0	6.57E-05	15224	15224	1	1	0	6.57E-05	15224
chr9	446401	chr9	446401	rs140403518			A	G	0.118998	0.227833	17209	0.00833333	0.000993246	120	15102	1	15	0	0	0	0	1	15	15222	16	16	0	0.00105111	15222	15222	16	16	0	0.00105111	15222
chr9	97873791	chr9	95111509				A	G	0.00788229	0.0663129	783.59	0.00833333	0	120	15104	1	0	0	0	0	0	1	0	15224	1	1	0	6.57E-05	15224	15224	1	1	0	6.57E-05	15224
chr9	97873792	chr9	95111510				A	C	0.00788333	0.0663129	783.59	0.00833333	0	120	15102	1	0	0	0	0	0	1	0	15222	1	1	0	6.57E-05	15222	15222	1	1	0	6.57E-05	15222
chr9	97912337	chr9	95150055	rs370346767			C	T	0.0912669	0.196394	23311.2	0.00833333	0.000733725	120	14992	1	11	0	0	0	0	1	11	15112	12	12	0	0.000794071	15112	15112	12	12	0	0.000794071	15112
chr9	97912355	chr9	95150073				C	T	0.00798722	0.0663129	416.59	0.00833333	0	120	14904	1	0	0	0	0	0	1	0	15024	1	1	0	6.66E-05	15024	15024	1	1	0	6.66E-05	15024
chr9	97933391	chr9	95171109	.			T	C			7863.5	.	6.96E-05	0	14362	0	1	0	0	0	0	0	1	14362	1	1	0	6.96E-05	14362	14362	1	1	0	6.96E-05
chr9	97933391	chr9	95171109	.			TTCTC	T			7863.5	.	6.96E-05	0	14362	0	1	0	0	0	0	0	1	14362	1	1	0	6.96E-05	14362	14362	1	1	0	6.96E-05
chr9	98011545	chr9	95249263	rs143152201			C	T	0.277512	0.39309	81791.7	0.00833333	0.00264971	120	15096	1	40	0	0	0	0	1	40	15216	41	41	0	0.00269453	15216	15216	41	41	0	0.00269453	15216
chr9	98638328	chr9	95876046	rs151308487			C	A	0.159022	0.275293	192028	0.0166667	0.00581703	120	11346	2	66	0	0	0	2	2	64	11466	66	66	2	0.00593058	11466	11466	66	66	2	0.00593058	11466
chr9	98643523	chr9	95881241	rs368518723			A	G	0.0208518	0.0899107	2960.88	0.00833333	8.83E-05	120	11330	1	1	0	0	0	0	1	1	11450	2	2	0	0.000174672	11450	11450	2	2	0	0.000174672	11450
chr9	98734420	chr9	95972138				C	T	0.163781	0.279511	51599.8	0.00833333	0.00140423	120	10682	1	15	0	0	0	0	1	15	10802	16	16	0	0.00148121	10802	10802	16	16	0	0.00148121	10802
chr9	98734519	chr9	95972237	rs188610453			C	T	0.158943	0.275293	39625.2	0.00862069	0.00140555	116	10672	1	15	0	0	0	0	1	15	10788	16	16	0	0.00148313	10788	10788	16	16	0	0.00148313	10788
chr9	98734885	chr9	95972603	.			AAAG	A			4119.1	.	0.000100664	0	9934	0	1	0	0	0	0	0	1	9934	1	1	0	0.000100664	9934	9934	1	1	0	0.000100664
chr9	98734888	chr9	95972606	rs185740878			G	A	0.182285	0.301185	37477.1	0.00833333	0.00159146	120	10682	1	17	0	0	0	0	1	17	10802	18	18	0	0.00166636	10802	10802	18	18	0	0.00166636	10802
chr9	98734888	chr9	95972606	rs185740878			G	*	1	1	37477.1	0	9.36E-05	120	10682	0	1	0	0	0	0	0	1	10802	1	1	0	9.26E-05	10802	10802	1	1	0	9.26E-05	10802
chr9	101867537	chr9	99105255	rs11466445			T	TGGC	0.147287	0.261548	40481.6	0.00877193	0	114	660	1	0	0	0	0	0	1	0	774	1	1	0	0.00129199	774	774	1	1	0	0.00129199	774
chr9	101867537	chr9	99105255	rs11466445			TGGCGGCGGC	T	0.15341	0.269641	40481.6	0.122807	0.0818182	114	660	14	54	0	0	2	4	12	50	774	62	62	6	0.0878553	774	774	62	62	6	0.0878553	774
chr9	101867558	chr9	99105276				C	T	0.0737542	0.175836	16244.9	0.00892857	0.000589391	112	10180	1	6	0	0	0	0	1	6	10292	7	7	0	0.00068014	10292	10292	7	7	0	0.00068014	10292
chr9	101911508	chr9	99149226	rs141259922			A	G	0.260987	0.380169	50875.6	0.00833333	0.00246076	120	15036	1	37	0	0	0	0	1	37	15156	38	38	0	0.00250726	15156	15156	38	38	0	0.00250726	15156
chr9	120470884	chr9	117708606	rs78848399			A	G	0.278415	0.39309	57667	0.00833333	0.00265993	120	15038	1	40	0	0	0	0	1	40	15158	41	41	0	0.00270484	15158	15158	41	41	0	0.00270484	15158
chr9	120474678	chr9	117712400	rs141943958			A	G	0.313353	0.424165	70473	0.00833333	0.00307251	120	14646	1	45	0	0	0	0	1	45	14766	46	46	0	0.00311526	14766	14766	46	46	0	0.00311526	14766
chr9	120475248	chr9	117712970	rs137853920			G	A	0.26598	0.382439	90868.7	0.00833333	0.00251756	120	15094	1	38	0	0	0	0	1	38	15214	39	39	0	0.00256343	15214	15214	39	39	0	0.00256343	15214
chr9	120476705	chr9	117714427				A	G	0.00789578	0.0663129	402.59	0.00833333	0	120	15078	1	0	0	0	0	0	1	0	15198	1	1	0	6.58E-05	15198	15198	1	1	0	6.58E-05	15198
chr9	123737203	chr9	120974925	rs200674959			T	C	0.239153	0.35899	59892.8	0.00833333	0.00221715	120	14884	1	33	0	0	0	0	1	33	15004	34	34	0	0.00226606	15004	15004	34	34	0	0.00226606	15004
chr9	123762323	chr9	121000045	rs139479771			C	A	1	1	24919.9	0.0172414	0.021327	116	1688	2	36	0	0	0	0	2	36	1804	38	38	0	0.0210643	1804	1804	38	38	0	0.0210643	1804
chr9	123762323	chr9	121000045	rs139479771			C	T	1	1	24919.9	0	0.000592417	116	1688	0	1	0	0	0	0	0	1	1804	1	1	0	0.000554324	1804	1804	1	1	0	0.000554324	1804
chr9	123837050	chr9	121074772				G	A	0.0141409	0.0788654	363.59	0.00833333	0	120	8366	1	0	0	0	0	0	1	0	8486	1	1	0	0.000117841	8486	8486	1	1	0	0.000117841	8486
chr9	136131438	chr9	133256051				G	A	0.0162604	0.0803622	1140.31	0.00833333	6.86E-05	120	14580	1	1	0	0	0	0	1	1	14700	2	2	0	0.000136054	14700	14700	2	2	0	0.000136054	14700
chr9	136131591	chr9	133256204	rs56039827			C	T	0.0615089	0.152249	24541.6	0.00833333	0.000464622	120	15066	1	7	0	0	0	0	1	7	15186	8	8	0	0.000526801	15186	15186	8	8	0	0.000526801	15186
chr9	139259592	chr9	136365140	rs141992399			C	G	0.152856	0.269641	224608	0.0166667	0.00569386	120	15104	2	86	0	0	0	0	2	86	15224	88	88	0	0.00578035	15224	15224	88	88	0	0.00578035	15224
chr9	139265370	chr9	136370918	rs374298700			C	T	0.205449	0.323183	50226.6	0.00833333	0.00185603	120	15086	1	28	0	0	0	0	1	28	15206	29	29	0	0.00190714	15206	15206	29	29	0	0.00190714	15206
chr9	139839852	chr9	136945400				G	A	0.031051	0.10344	8077.41	0.00833333	0.000176149	120	11354	1	2	0	0	0	0	1	2	11474	3	3	0	0.000261461	11474	11474	3	3	0	0.000261461	11474
chr9	139841132	chr9	136946680	rs150744928			G	A	0.37085	0.482262	143167	0.00833333	0.00378654	120	11356	1	43	0	0	0	0	1	43	11476	44	44	0	0.00383409	11476	11476	44	44	0	0.00383409	11476
chrX	15585944	chrX	15567821				T	G	0.0313538	0.10344	2027.76	0.00833333	0.000177904	120	11242	1	2	0	0	0	2	1	0	11362	1	1	2	0.000264038	11362	11362	1	1	2	0.000264038	11362
chrX	19713116	chrX	19694998				T	C	0.0319505	0.104331	3103.27	0.00862069	0.000187617	116	10660	1	2	0	0	0	2	1	0	10776	1	1	2	0.000278396	10776	10776	1	1	2	0.000278396	10776
chrX	19725078	chrX	19706960				T	A	0.0104858	0.0663129	113.69	0.00833333	0	120	11324	1	0	0	0	0	0	1	0	11444	1	1	0	8.74E-05	11444	11444	1	1	0	8.74E-05	11444
chrX	24761440	chrX	24743323				A	G	0.0106345	0.0663129	378.67	0.00833333	0	120	11164	1	0	0	0	0	0	1	0	11284	1	1	0	8.86E-05	11284	11284	1	1	0	8.86E-05	11284
chrX	44732905	chrX	44873659				G	T	0.015796	0.0788654	3979.84	0.00833333	6.66E-05	120	15014	1	1	0	0	0	0	1	1	15134	2	2	0	0.000132153	15134	15134	2	2	0	0.000132153	15134
chrX	47486975	chrX	47627576				G	A	0.0396443	0.121942	139839	0.0166667	0.00251889	120	15086	2	38	0	0	2	16	0	22	15206	22	22	18	0.00263054	15206	15206	22	22	18	0.00263054	15206
chrX	48547317	chrX	48688928	rs375356111			G	A	0.00505148	0.0663129	54907.1	0.0322581	0.00157129	62	12092	2	19	0	0	2	6	0	13	12154	13	13	8	0.00172783	12154	12154	13	13	8	0.00172783	12154
chrX	48666540	chrX	48808133				C	T	0.0105015	0.0663129	512.83	0.00862069	0	116	10930	1	0	0	0	0	0	1	0	11046	1	1	0	9.05E-05	11046	11046	1	1	0	9.05E-05	11046
chrX	70327654	chrX	71107804	rs140216601			C	T	0.00778364	0.0663129	177.67	0.00847458	0	118	15042	1	0	0	0	0	0	1	0	15160	1	1	0	6.60E-05	15160	15160	1	1	0	6.60E-05	15160
chrX	77109475	chrX	77853978				A	C	0.00326582	0.0663129	9403.4	0.0166667	0.000598802	120	15030	2	9	0	0	2	6	0	3	15150	3	3	8	0.000726073	15150	15150	3	3	8	0.000726073	15150
chrX	153770531	chrX	154542316				C	T	0.00313883	0.0663129	41437.8	0.0169492	0.000596659	118	15084	2	9	0	0	2	4	0	5	15202	5	5	6	0.000723589	15202	15202	5	5	6	0.000723589	15202
chrX	153774997	chrX	154546782				C	G	0.00278511	0.0663129	13829.4	0.0166667	0.000542299	120	14752	2	8	0	0	2	4	0	4	14872	4	4	6	0.000672405	14872	14872	4	4	6	0.000672405	14872
		chr3	10089738
		chr6	32006858
